# Supplementary material for: Gene Mapping via Bulked Segregant RNA-Seq (BSR-Seq)
Source: PLoS One. 2012 May 7;7(5):e36406. doi: 10.1371/journal.pone.0036406 (PMC3346754; doi:10.1371/journal.pone.0036406)
Supplement: Table S2 — provides the detailed differential expression test result of genes (4a53). Test was performed on the informative genes that are those genes with at least 20 average reads across the two samples. Description of each column in this table: • GeneID: gene ID; • Ref: version of the reference genome; • Chr: chromosome; • Ori: gene orientation (either forward (+) or reverse (−) strand); • Start: the first physical position of the gene on the chromosome; • End: the last physical position of the gene on the chromosome; • ExonSize: total length of all the gene’s annotated exons; • gl3mut: raw read counts for the gene of the sample of the gl3 mutant pool; • gl3wt: raw read counts for the gene of the sample of the gl3 non-mutant pool; • gl3mut.RPKM: normalized read counts of a given gene (“RPKM” means reads per kb exonic sequence per million uniquely mapped reads) in the sample of the gl3 mutant pool; • gl3wt.RPKM: normalized read counts of a given gene in the sample of the gl3 non-mutant pool; • gl3wt:mut_log2FC: log2 of fold change between the gl3 non-mutant pool and the mutant pool; • gl3wt:mut_pvalue: p_value of the statistical test for differential expression of this gene between the gl3 non-mutant pool and the mutant pool; • gl3wt:mut_qvalue: the corrected p-values (q_values) for differential expression of this gene after correcting for multiple testing; • gl3wt:mut_sig: the answer to the question “Is this gene significantly expressed?” The gene with the q_value smaller than 0.001 (FDR 0.1%) and having an absolute log2 fold change of >0.8 was labeled with “yes”. • description: description of genes. (XLS) [file pone.0036406.s006.xls]

## Sheet: DE
Table S2. Result of differential expression tests
Table S2 provides the detailed differential expression test result of genes (4a53). Test was performed on the informative genes that are those genes with at least 20 average reads across the two samples. Description of each column in this table:
· GeneID: gene ID
· Ref: version of the reference genome
· Chr: chromosome
· Ori: gene orientation (either forward (+) or reverse (-) strand)
· Start: the first physical position of the gene on the chromosome
· End: the last physical position of the gene on the chromosome
· ExonSize: total length of all the gene’s annotated exons
· gl3mut: raw read counts for the gene of the sample of the gl3 mutant pool
· gl3wt: raw read counts for the gene of the sample of the gl3 non-mutant pool
· gl3mut.RPKM: normalized read counts of a given gene (“RPKM” means reads per kb exonic sequence per million uniquely mapped reads) in the sample of the gl3 mutant pool
· gl3wt.RPKM: normalized read counts of a given gene in the sample of the gl3 non-mutant pool
· gl3wt:mut_log2FC: log2 of fold change between the gl3 non-mutant pool and the mutant pool
· gl3wt:mut_pvalue: p_value of the statistical test for differential expression of this gene between the gl3 non-mutant pool and the mutant pool
· gl3wt:mut_qvalue: the corrected p-values (q_values) for differential expression of this gene after correcting for multiple testing
· gl3wt:mut_sig: the answer to the question “Is this gene significantly expressed?” The gene with the q_value smaller than 0.001 (FDR 0.1%) and having an absolute log2 fold change of >0.8 was labeled with “yes”.
· description: description of genes
GeneID	Ref	Chr	Ori	Start	End	ExonSize	gl3mut	gl3wt	gl3mut.RPKM	gl3wt.RPKM	gl3wt:mut_log2FC	gl3wt:mut_pvalue	gl3wt:mut_qvalue	gl3wt:mut_sig	description
AC147602.5_FG002	Refgen1	3	+	177051927	177053900	1974	2	1	0.152	0.077	NA	NA	NA	NA	NA
AC147602.5_FG003	Refgen1	3	-	177062945	177064394	681	6452	4664	1420	1043.83	-0.42	1.08877e-52	1.35901e-50	no	NA
AC147602.5_FG004	Refgen1	3	+	177072769	177074234	483	3618	2163	1122.7	682.541	-0.69	1.85479e-72	3.2656e-70	no	sedoheptulose-1,7-bisphosphatase
AC147602.5_FG005	Refgen1	3	+	177118777	177126033	2718	244	317	13.455	17.776	0.42	0.000528254	0.00239771	no	NA
AC148152.3_FG001	Refgen1	2	-	228345648	228347484	1599	6	12	0.562	1.144	NA	NA	NA	NA	NA
AC148152.3_FG005	Refgen1	2	-	228269851	228271219	1062	1494	761	210.847	109.214	-0.92	1.47253e-49	1.78475e-47	yes	1-aminocyclopropane-1-carboxylate oxidase
AC148152.3_FG006	Refgen1	2	+	228224833	228228214	1047	0	0	0	0	NA	NA	NA	NA	NA
AC148152.3_FG008	Refgen1	2	-	228196232	228200539	1977	256	275	19.408	21.2	0.15	0.241254	0.369694	no	putative beta-glycosidase
AC148167.6_FG001	Refgen1	7	+	11551709	11555287	1107	235	259	31.817	35.659	0.19	0.150136	0.258218	no	LOC100284611
AC149475.2_FG002	Refgen1	9	-	148163774	148166598	474	23	25	7.273	8.039	0.16	0.773251	0.857425	no	nicotiana lesion-inducing like
AC149475.2_FG003	Refgen1	9	-	148169018	148173108	777	105	127	20.254	24.912	0.32	0.100501	0.188937	no	proteasome subunit alpha type 5
AC149475.2_FG005	Refgen1	9	+	148203162	148213829	4569	303	449	9.939	14.978	0.61	7.43714e-09	9.81022e-08	no	hypothetical protein LOC100381553
AC149475.2_FG007	Refgen1	9	-	148234445	148235122	678	37	20	8.179	4.496	-0.81	0.0344815	0.0798473	no	N-acetyltransferase
AC149633.4_FG002	Refgen1	9	-	150955779	150961584	3528	32	55	1.359	2.376	0.81	0.00981525	0.028601	no	NA
AC149633.4_FG003	Refgen1	9	-	150945486	150947555	2070	0	0	0	0	NA	NA	NA	NA	NA
AC149633.4_FG005	Refgen1	9	+	150899534	150901308	564	56	89	14.882	24.051	0.71	0.00355324	0.0122464	no	NA
AC149810.2_FG003	Refgen1	9	-	147237424	147245260	3540	0	0	0	0	NA	NA	NA	NA	NA
AC149810.2_FG004	Refgen1	9	-	147249043	147249690	648	0	0	0	0	NA	NA	NA	NA	ABC-type Co2+ transport system, permease component
AC149810.2_FG008	Refgen1	9	+	147292073	147294251	1065	58	24	8.162	3.435	-1.19	0.0003488	0.001675	no	hypothetical protein LOC100272528
AC149818.2_FG001	Refgen1	9	+	148093497	148099988	747	16	33	3.21	6.733	1.05	0.0143326	0.039018	no	ras-related protein Rab-18
AC149818.2_FG004	Refgen1	9	+	148115075	148115555	264	4	3	2.271	1.732	NA	NA	NA	NA	cyclin-dependent kinases regulatory subunit
AC149818.2_FG005	Refgen1	9	-	148119792	148120660	573	0	0	0	0	NA	NA	NA	NA	NA
AC149818.2_FG006	Refgen1	9	-	148121408	148123729	522	47	49	13.495	14.307	0.11	0.75982	0.848891	no	hypothetical protein LOC100194405
AC149818.2_FG007	Refgen1	9	-	148131864	148133153	1290	11	5	1.278	0.591	NA	NA	NA	NA	hypothetical protein LOC100274824
AC149818.2_FG008	Refgen1	9	-	148138525	148140420	1656	29	32	2.625	2.945	0.18	0.611687	0.730842	no	NA
AC149818.2_FG009	Refgen1	9	-	148159324	148160151	699	0	0	0	0	NA	NA	NA	NA	RTCS-like protein
AC149828.2_FG002	Refgen1	9	+	146030196	146034743	645	40	32	9.295	7.562	-0.27	0.479818	0.61625	no	NA
AC149828.2_FG003	Refgen1	9	-	146085544	146088324	489	0	0	0	0	NA	NA	NA	NA	NA
AC149828.2_FG004	Refgen1	9	-	146094028	146094420	393	2	2	0.763	0.776	NA	NA	NA	NA	NA
AC149829.2_FG002	Refgen1	9	-	146773803	146774057	255	3	3	1.763	1.793	NA	NA	NA	NA	Putative uncharacterized protein
AC149829.2_FG003	Refgen1	9	-	146775506	146779264	3075	13	18	0.634	0.892	NA	NA	NA	NA	NA
AC149829.2_FG004	Refgen1	9	-	146786027	146787193	450	27	29	8.993	9.822	0.15	0.78954	0.86932	no	LOC100284841
AC149829.2_FG006	Refgen1	9	-	146806704	146807990	1287	708	574	82.451	67.976	-0.25	0.00159265	0.00620515	no	LOC100283956
AC150739.3_FG001	Refgen1	9	+	150793586	150796706	1476	24	19	2.437	1.962	-0.27	0.544724	0.674044	no	hypothetical protein LOC100279903
AC152495.1_FG002	Refgen1	10	-	2806140	2810036	3897	29	85	1.115	3.324	1.57	4.8791e-08	5.60493e-07	yes	Rust resistance protein
AC152495.1_FG003	Refgen1	10	-	2823077	2826913	3837	11	4	0.43	0.159	NA	NA	NA	NA	Rust resistance-like protein RP1-2
AC152495.1_FG010	Refgen1	10	-	2894771	2898655	3885	19	38	0.733	1.491	1.01	0.011174	0.0318229	no	Rust resistance-like protein RP1
AC152495.1_FG011	Refgen1	10	+	2900002	2901369	1368	0	3	0	0.334	NA	NA	NA	NA	NA
AC152495.1_FG012	Refgen1	10	-	2908329	2910895	1917	18	13	1.407	1.034	NA	NA	NA	NA	NA
AC152495.1_FG015	Refgen1	10	-	2926722	2927984	1263	0	0	0	0	NA	NA	NA	NA	NA
AC152495.1_FG017	Refgen1	10	-	2964062	2967283	3222	6	7	0.279	0.331	NA	NA	NA	NA	NA
AC152495.1_FG018	Refgen1	10	-	2968067	2969440	1143	27	25	3.54	3.334	-0.06	0.89065	0.942952	no	NA
AC155352.2_FG001	Refgen1	2	-	35170896	35173726	1266	0	0	0	0	NA	NA	NA	NA	NA
AC155363.2_FG006	Refgen1	3	-	1405990	1406964	576	6	2	1.561	0.529	NA	NA	NA	NA	NA
AC155376.2_FG005	Refgen1	8	-	162875938	162883761	1446	22	25	2.28	2.635	0.22	0.662261	0.771055	no	hypothetical protein LOC100381862
AC155377.1_FG001	Refgen1	3	-	219309188	219324936	4398	261	280	8.895	9.703	0.15	0.245623	0.374843	no	myosin1
AC155377.1_FG002	Refgen1	3	-	219405354	219411050	1521	73	104	7.193	10.421	0.55	0.0128905	0.0357675	no	NA
AC155390.2_FG002	Refgen1	1	-	32708882	32710879	1998	2	0	0.15	0	NA	NA	NA	NA	hypothetical protein LOC100194323
AC155417.2_FG009	Refgen1	1	-	296389531	296392477	1080	111	118	15.404	16.652	0.13	0.508806	0.642356	no	NA
AC155434.2_FG001	Refgen1	7	-	168083997	168085443	930	28	34	4.512	5.572	0.32	0.377698	0.517848	no	NA
AC155434.2_FG003	Refgen1	7	-	168089155	168091520	636	0	0	0	0	NA	NA	NA	NA	NA
AC155434.2_FG004	Refgen1	7	+	168126482	168137641	5208	215	275	6.187	8.048	0.4	0.00243382	0.00889405	no	hypothetical protein LOC100304359
AC155434.2_FG005	Refgen1	7	+	168144893	168147070	1104	15	12	2.036	1.657	NA	NA	NA	NA	hypothetical protein LOC100384296
AC155434.2_FG006	Refgen1	7	+	168156864	168158300	1437	148	91	15.436	9.652	-0.65	0.000589585	0.00264219	no	hypothetical protein LOC100276261
AC155434.2_FG007	Refgen1	7	-	168041065	168043692	1059	2	6	0.283	0.864	NA	NA	NA	NA	NA
AC155434.2_FG009	Refgen1	7	+	168051273	168054055	798	0	0	0	0	NA	NA	NA	NA	NA
AC155496.2_FG008	Refgen1	5	+	4774773	4782244	1665	112	130	10.082	11.9	0.26	0.176854	0.292529	no	NA
AC155610.2_FG004	Refgen1	3	+	173955420	173957504	549	22	33	6.006	9.161	0.61	0.137275	0.240804	no	NA
AC155610.2_FG005	Refgen1	3	-	173959733	173960903	729	22	17	4.523	3.554	NA	NA	NA	NA	NA
AC155610.2_FG007	Refgen1	3	+	173978706	173981485	1341	839	327	93.772	37.165	-1.31	6.97342e-49	8.04396e-47	yes	hypothetical protein LOC100273498
AC155610.2_FG009	Refgen1	3	+	173993722	173993922	201	19	11	14.168	8.341	NA	NA	NA	NA	NA
AC155622.2_FG001	Refgen1	3	-	4393743	4394936	1194	166	169	20.837	21.573	0.07	0.662181	0.771055	no	hypothetical protein LOC100192909
AC155624.2_FG006	Refgen1	1	+	8228458	8231701	1059	33	54	4.67	7.772	0.74	0.0180446	0.0470554	no	hypothetical protein LOC100382150
AC155624.2_FG007	Refgen1	1	-	8234683	8237385	1185	135	112	17.075	14.405	-0.22	0.251965	0.382051	no	NA
AC155624.2_FG010	Refgen1	1	+	8254951	8258143	921	45	58	7.323	9.598	0.41	0.167578	0.280986	no	NA
AC155624.2_FG011	Refgen1	1	-	8259168	8262244	831	370	349	66.733	64.009	-0.04	0.737237	0.831772	no	Putative uncharacterized protein
AC159612.1_FG007	Refgen1	5	+	4572536	4574136	1359	59	52	6.507	5.832	-0.13	0.636294	0.751918	no	NA
AC159612.1_FG008	Refgen1	5	-	4564415	4568337	966	15	18	2.327	2.84	NA	NA	NA	NA	NA
AC165171.2_FG002	Refgen1	3	+	140923970	140925373	1014	1	2	0.148	0.301	NA	NA	NA	NA	hypothetical protein LOC100191206
AC165171.2_FG003	Refgen1	3	-	140867252	140869985	1314	3	3	0.342	0.348	NA	NA	NA	NA	NA
AC165171.2_FG004	Refgen1	3	+	140863472	140866024	990	2	0	0.303	0	NA	NA	NA	NA	NA
AC165178.2_FG004	Refgen1	2	-	178522488	178523696	855	20	8	3.506	1.426	NA	NA	NA	NA	R2R3MYB-domain protein Fragment
AC166636.1_FG007	Refgen1	1	-	19911644	19912488	720	29	16	6.037	3.387	-0.77	0.0741719	0.148896	no	hypothetical protein LOC100277752
AC166636.1_FG008	Refgen1	1	+	19919853	19920401	201	1	1	0.746	0.758	NA	NA	NA	NA	LOC100281229
AC166636.1_FG010	Refgen1	1	-	19922021	19924137	1557	5	1	0.481	0.098	NA	NA	NA	NA	NA
AC177833.2_FG001	Refgen1	2	-	106383819	106387679	750	0	0	0	0	NA	NA	NA	NA	NA
AC177860.4_FG002	Refgen1	2	+	170382826	170385021	1179	0	0	0	0	NA	NA	NA	NA	NA
AC177870.3_FG006	Refgen1	1	-	297206921	297207581	495	121	90	36.637	27.711	-0.38	0.0628975	0.130443	no	NA
AC177893.3_FG003	Refgen1	2	-	207993424	207994047	624	0	0	0	0	NA	NA	NA	NA	NA
AC177894.2_FG007	Refgen1	2	+	16041753	16043322	1014	59	54	8.721	8.117	-0.08	0.778612	0.861656	no	NA
AC177897.2_FG002	Refgen1	1	+	259255577	259257954	1098	12	13	1.638	1.805	NA	NA	NA	NA	hypothetical protein LOC100274874
AC177897.2_FG011	Refgen1	1	+	259066365	259074256	885	26	40	4.403	6.889	0.65	0.0657153	0.135081	no	NA
AC177897.2_FG022	Refgen1	1	+	259172005	259173975	1749	0	0	0	0	NA	NA	NA	NA	NA
AC177897.2_FG029	Refgen1	1	+	259148808	259149368	561	0	0	0	0	NA	NA	NA	NA	NA
AC177899.2_FG009	Refgen1	1	+	299329236	299331356	2121	26	29	1.837	2.084	0.2	0.686197	0.790667	no	NA
AC177899.2_FG012	Refgen1	1	+	299229582	299232060	1497	0	0	0	0	NA	NA	NA	NA	NA
AC177908.3_FG002	Refgen1	1	-	71637858	71639508	1401	100	126	10.698	13.707	0.38	0.053497	0.114658	no	transferase, transferring glycosyl groups
AC177924.2_FG001	Refgen1	2	-	70636244	70641050	828	0	0	0	0	NA	NA	NA	NA	NA
AC177924.2_FG003	Refgen1	2	+	70659283	70659618	336	52	20	23.196	9.072	-1.29	0.000335901	0.00162191	no	NA
AC177926.2_FG003	Refgen1	1	+	294479881	294480537	657	4	0	0.913	0	NA	NA	NA	NA	NA
AC177931.2_FG008	Refgen1	1	-	21773239	21777797	729	0	0	0	0	NA	NA	NA	NA	NA
AC177941.3_FG001	Refgen1	1	+	36002772	36005255	2484	0	0	0	0	NA	NA	NA	NA	NA
AC177941.3_FG006	Refgen1	1	+	35890778	35891591	732	0	0	0	0	NA	NA	NA	NA	NA
AC177946.2_FG004	Refgen1	1	+	19035272	19035748	477	72	41	22.623	13.1	-0.75	0.00627051	0.0196648	no	Putative uncharacterized protein
AC182413.4_FG002	Refgen1	5	-	4200545	4203965	681	0	0	0	0	NA	NA	NA	NA	NA
AC182418.6_FG009	Refgen1	5	-	2792578	2794764	405	311	217	115.092	81.663	-0.47	0.000210596	0.00108116	no	NA
AC182418.6_FG010	Refgen1	5	-	2786601	2788385	789	21	23	3.989	4.443	0.17	0.76358	0.851557	no	NA
AC182439.4_FG004	Refgen1	3	-	46491976	46492455	330	0	0	0	0	NA	NA	NA	NA	NA
AC182482.3_FG003	Refgen1	3	+	22655031	22658480	1656	137	110	12.399	10.124	-0.27	0.161372	0.273365	no	NA
AC182617.3_FG001	Refgen1	3	-	123474193	123480320	1062	118	102	16.653	14.638	-0.16	0.418891	0.559766	no	hypothetical protein LOC100273435
AC182831.3_FG004	Refgen1	3	+	192392423	192393010	588	0	0	0	0	NA	NA	NA	NA	NA
AC183315.4_FG006	Refgen1	3	-	27870434	27874263	1260	63	70	7.494	8.467	0.2	0.436328	0.576691	no	NA
AC183412.5_FG005	Refgen1	2	+	26771656	26775247	3168	9	7	0.426	0.337	NA	NA	NA	NA	NA
AC183514.3_FG006	Refgen1	3	-	166792038	166795262	687	0	0	0	0	NA	NA	NA	NA	NA
AC183888.4_FG006	Refgen1	4	-	245861015	245864903	630	13	5	3.093	1.21	NA	NA	NA	NA	NA
AC183928.4_FG001	Refgen1	7	+	109608	111503	1824	0	0	0	0	NA	NA	NA	NA	NA
AC183932.3_FG007	Refgen1	5	+	5565384	5568148	2061	37	20	2.691	1.479	-0.81	0.0344815	0.0798473	no	NA
AC183938.4_FG011	Refgen1	10	-	142478352	142481449	825	0	0	0	0	NA	NA	NA	NA	NA
AC183950.2_FG001	Refgen1	8	+	161817252	161820162	678	7	10	1.547	2.248	NA	NA	NA	NA	NA
AC183950.2_FG002	Refgen1	8	+	161883273	161883689	417	0	0	0	0	NA	NA	NA	NA	NA
AC183950.2_FG003	Refgen1	8	+	161884157	161886593	684	0	0	0	0	NA	NA	NA	NA	NA
AC183950.2_FG004	Refgen1	8	+	161918126	161920865	1566	5	8	0.479	0.779	NA	NA	NA	NA	NA
AC183950.2_FG005	Refgen1	8	-	161922004	161923470	1467	6	15	0.613	1.558	NA	NA	NA	NA	hypothetical protein LOC100274616
AC183950.2_FG007	Refgen1	8	-	161946892	161950703	987	18	13	2.733	2.007	NA	NA	NA	NA	NA
AC184112.4_FG010	Refgen1	3	-	151828123	151828942	675	0	0	0	0	NA	NA	NA	NA	NA
AC184130.4_FG005	Refgen1	4	+	240865041	240865934	894	0	0	0	0	NA	NA	NA	NA	NA
AC184130.4_FG012	Refgen1	4	-	240834114	240837195	1092	1	3	0.137	0.419	NA	NA	NA	NA	NA
AC184164.2_FG004	Refgen1	3	+	207753989	207754755	438	0	0	0	0	NA	NA	NA	NA	NA
AC184164.2_FG006	Refgen1	3	-	207775887	207776285	399	0	0	0	0	NA	NA	NA	NA	NA
AC184169.3_FG001	Refgen1	4	+	26646630	26647773	615	22	2	5.362	0.496	NA	NA	NA	NA	NA
AC184172.3_FG001	Refgen1	4	+	157380498	157381337	600	0	0	0	0	NA	NA	NA	NA	NA
AC184699.3_FG005	Refgen1	3	+	219112123	219114424	2091	0	0	0	0	NA	NA	NA	NA	NA
AC184764.3_FG003	Refgen1	4	+	217920305	217921156	642	0	0	0	0	NA	NA	NA	NA	NA
AC184794.2_FG003	Refgen1	4	+	93767346	93769072	1515	0	0	0	0	NA	NA	NA	NA	NA
AC184831.3_FG003	Refgen1	4	+	244091667	244092551	885	4	8	0.677	1.378	NA	NA	NA	NA	NA
AC184831.3_FG005	Refgen1	4	-	244101392	244102237	846	0	0	0	0	NA	NA	NA	NA	NA
AC184831.3_FG008	Refgen1	4	-	244173444	244174289	846	0	0	0	0	NA	NA	NA	NA	NA
AC184839.3_FG002	Refgen1	4	+	65640057	65648225	1320	104	125	11.809	14.433	0.31	0.112544	0.20645	no	NA
AC185108.3_FG010	Refgen1	7	-	156676739	156677596	858	0	0	0	0	NA	NA	NA	NA	hypothetical protein LOC100277763
AC185108.3_FG011	Refgen1	7	+	156680839	156681435	597	0	0	0	0	NA	NA	NA	NA	NA
AC185126.3_FG006	Refgen1	4	+	193761045	193761548	504	0	0	0	0	NA	NA	NA	NA	NA
AC185130.2_FG004	Refgen1	5	-	75392083	75397047	849	0	0	0	0	NA	NA	NA	NA	NA
AC185130.2_FG005	Refgen1	5	-	75373288	75376167	504	0	0	0	0	NA	NA	NA	NA	NA
AC185210.3_FG002	Refgen1	3	-	189419428	189420929	1179	2	1	0.254	0.129	NA	NA	NA	NA	NA
AC185213.3_FG003	Refgen1	3	-	175034491	175036767	1065	2	4	0.281	0.572	NA	NA	NA	NA	NA
AC185226.4_FG001	Refgen1	4	-	161668096	161677801	2790	314	435	16.868	23.763	0.52	1.11273e-06	9.99544e-06	no	NA
AC185251.3_FG003	Refgen1	5	-	104983821	104984384	564	0	0	0	0	NA	NA	NA	NA	NA
AC185261.4_FG002	Refgen1	5	-	59505377	59505841	465	0	0	0	0	NA	NA	NA	NA	NA
AC185281.5_FG006	Refgen1	5	+	90100127	90101823	624	0	0	0	0	NA	NA	NA	NA	NA
AC185300.4_FG002	Refgen1	4	-	233618911	233619987	1077	36	13	5.01	1.84	-1.35	0.00150264	0.00589841	no	NA
AC185415.3_FG005	Refgen1	2	-	194784845	194788294	1473	36	33	3.663	3.415	-0.07	0.904295	0.950555	no	NA
AC185421.3_FG001	Refgen1	4	-	62024412	62024732	213	12	29	8.444	20.751	1.25	0.00723675	0.0222585	no	NA
AC185422.3_FG005	Refgen1	4	+	148282335	148283659	747	5	6	1.003	1.224	NA	NA	NA	NA	NA
AC185444.3_FG003	Refgen1	5	-	31324418	31326248	681	31	27	6.823	6.043	-0.15	0.69627	0.798151	no	NA
AC185458.4_FG002	Refgen1	5	-	191790479	191791162	684	10	17	2.191	3.788	NA	NA	NA	NA	NA
AC185460.3_FG004	Refgen1	5	+	182861873	182862802	930	0	0	0	0	NA	NA	NA	NA	NA
AC185467.3_FG002	Refgen1	4	-	179141450	179144269	924	42	76	6.813	12.536	0.89	0.00117716	0.00476273	no	NA
AC185471.3_FG005	Refgen1	4	+	166005662	166006449	375	4	0	1.599	0	NA	NA	NA	NA	microtubule motor
AC185474.3_FG006	Refgen1	4	+	166067110	166069067	930	338	506	54.472	82.925	0.63	3.98817e-10	6.23421e-09	no	NA
AC185478.4_FG005	Refgen1	4	-	180487930	180488694	765	0	0	0	0	NA	NA	NA	NA	NA
AC185532.4_FG006	Refgen1	3	+	222400230	222401884	306	15	23	7.347	11.456	NA	NA	NA	NA	NA
AC185611.3_FG001	Refgen1	1	+	206220250	206220573	324	0	0	0	0	NA	NA	NA	NA	NA
AC185612.3_FG001	Refgen1	1	-	300154657	300168963	1980	338	370	25.585	28.481	0.18	0.106001	0.197085	no	NA
AC185642.4_FG001	Refgen1	4	+	163822787	163823113	327	0	0	0	0	NA	NA	NA	NA	NA
AC185648.3_FG007	Refgen1	4	+	173631263	173633579	1068	0	0	0	0	NA	NA	NA	NA	NA
AC185649.2_FG003	Refgen1	4	-	163595082	163595420	339	0	0	0	0	NA	NA	NA	NA	NA
AC185655.3_FG004	Refgen1	2	-	39756366	39757784	1419	0	0	0	0	NA	NA	NA	NA	NA
AC185655.3_FG005	Refgen1	2	-	39779183	39780700	1518	0	0	0	0	NA	NA	NA	NA	NA
AC185660.3_FG003	Refgen1	4	-	164016371	164016709	339	0	0	0	0	NA	NA	NA	NA	NA
AC186009.3_FG001	Refgen1	1	-	29802398	29803355	882	0	0	0	0	NA	NA	NA	NA	NA
AC186011.3_FG010	Refgen1	5	+	204687376	204703225	1278	1	0	0.117	0	NA	NA	NA	NA	NA
AC186147.3_FG008	Refgen1	4	-	161999171	162000505	1335	42	12	4.715	1.37	-1.68	5.84167e-05	0.000351214	yes	alpha-6-galactosyltransferase
AC186166.3_FG008	Refgen1	5	+	1821848	1823518	705	73	86	15.519	18.592	0.28	0.234265	0.36227	no	NA
AC186187.3_FG009	Refgen1	1	+	240783025	240783963	939	593	223	94.652	36.196	-1.36	5.14508e-37	3.9841e-35	yes	NA
AC186231.4_FG002	Refgen1	1	+	202455013	202455852	840	38	24	6.78	4.355	-0.59	0.126782	0.226385	no	hypothetical protein LOC100272479
AC186233.3_FG007	Refgen1	1	+	10166032	10168699	2424	0	0	0	0	NA	NA	NA	NA	NA
AC186287.7_FG005	Refgen1	4	-	173086021	173087493	1473	0	0	0	0	NA	NA	NA	NA	CPL3
AC186299.3_FG004	Refgen1	1	-	204091793	204092575	321	18	15	8.404	7.122	NA	NA	NA	NA	NA
AC186302.3_FG013	Refgen1	1	+	280829189	280830212	834	0	0	0	0	NA	NA	NA	NA	NA
AC186309.3_FG006	Refgen1	5	+	37724470	37725165	696	0	0	0	0	NA	NA	NA	NA	NA
AC186310.4_FG001	Refgen1	4	+	236163659	236168402	639	11	16	2.58	3.816	NA	NA	NA	NA	NA
AC186310.4_FG004	Refgen1	4	-	236217065	236219199	1977	1	0	0.076	0	NA	NA	NA	NA	NA
AC186319.4_FG002	Refgen1	1	+	142551960	142554111	1107	183	289	24.777	39.79	0.7	1.73598e-07	1.83193e-06	no	NA
AC186337.3_FG004	Refgen1	2	+	24584667	24587490	1554	115	72	11.091	7.062	-0.62	0.00421545	0.0141015	no	NA
AC186424.4_FG009	Refgen1	1	-	278662921	278663343	423	0	0	0	0	NA	NA	NA	NA	NA
AC186433.4_FG002	Refgen1	6	+	85124457	85125425	579	15	30	3.883	7.897	1	0.0243469	0.060294	no	NA
AC186500.3_FG001	Refgen1	5	-	121345618	121346307	690	0	0	0	0	NA	NA	NA	NA	NA
AC186524.3_FG005	Refgen1	1	-	180807066	180809572	597	0	0	0	0	NA	NA	NA	NA	NA
AC186577.3_FG006	Refgen1	6	-	1992870	1993592	723	4	3	0.829	0.632	NA	NA	NA	NA	NA
AC186579.3_FG007	Refgen1	8	-	157746466	157747465	759	0	0	0	0	NA	NA	NA	NA	NA
AC186585.4_FG002	Refgen1	6	+	44294281	44295755	615	0	0	0	0	NA	NA	NA	NA	NA
AC186592.3_FG002	Refgen1	6	+	73866311	73868926	2616	0	0	0	0	NA	NA	NA	NA	NA
AC186602.4_FG003	Refgen1	1	+	98527095	98528134	576	0	0	0	0	NA	NA	NA	NA	NA
AC186603.6_FG003	Refgen1	1	-	168564166	168565614	1449	1	0	0.103	0	NA	NA	NA	NA	Cytochrome P450 CYP76M15
AC186606.4_FG003	Refgen1	1	-	182474557	182475069	513	1	0	0.292	0	NA	NA	NA	NA	bZIP protein
AC186619.3_FG001	Refgen1	1	+	206744755	206746028	966	0	0	0	0	NA	NA	NA	NA	NA
AC186656.4_FG012	Refgen1	1	+	287656699	287658476	1077	0	0	0	0	NA	NA	NA	NA	NA
AC186661.3_FG003	Refgen1	3	-	95457418	95460641	729	40	69	8.224	14.426	0.82	0.00385898	0.0131243	no	NA
AC186795.3_FG006	Refgen1	6	+	56338001	56338901	456	59	35	19.392	11.698	-0.69	0.022936	0.0573948	no	NA
AC186828.3_FG001	Refgen1	6	+	76203268	76203696	429	0	0	0	0	NA	NA	NA	NA	NA
AC186897.4_FG016	Refgen1	8	-	13232853	13233284	432	1	0	0.347	0	NA	NA	NA	NA	NA
AC186902.4_FG009	Refgen1	1	+	278857496	278858110	615	0	0	0	0	NA	NA	NA	NA	NA
AC187072.4_FG002	Refgen1	7	+	158922942	158923937	996	0	0	0	0	NA	NA	NA	NA	NA
AC187080.3_FG006	Refgen1	6	+	90035076	90037978	2790	0	0	0	0	NA	NA	NA	NA	NA
AC187080.3_FG007	Refgen1	6	+	90023593	90025617	2025	0	2	0	0.151	NA	NA	NA	NA	NA
AC187082.3_FG003	Refgen1	7	+	41137493	41140287	870	0	0	0	0	NA	NA	NA	NA	NA
AC187085.3_FG003	Refgen1	8	-	44389944	44391845	1902	0	0	0	0	NA	NA	NA	NA	NA
AC187088.3_FG002	Refgen1	6	-	9321490	9322279	381	0	0	0	0	NA	NA	NA	NA	NA
AC187090.3_FG008	Refgen1	8	+	9571880	9573317	975	1	0	0.154	0	NA	NA	NA	NA	NA
AC187098.4_FG011	Refgen1	7	-	169068257	169069915	1659	103	106	9.305	9.738	0.09	0.678405	0.785206	no	LOC100285941
AC187099.5_FG005	Refgen1	8	+	119183421	119185846	537	0	0	0	0	NA	NA	NA	NA	NA
AC187154.5_FG003	Refgen1	7	-	48927915	48928871	957	70	86	10.963	13.696	0.34	0.149501	0.257286	no	NA
AC187157.4_FG001	Refgen1	8	+	22588920	22590021	876	2	0	0.342	0	NA	NA	NA	NA	NA
AC187157.4_FG002	Refgen1	8	-	22593479	22594361	420	32	21	11.419	7.621	-0.54	0.172007	0.286525	no	hypothetical protein LOC100216910
AC187157.4_FG003	Refgen1	8	+	22597130	22599570	321	7	4	3.268	1.899	NA	NA	NA	NA	NA
AC187157.4_FG004	Refgen1	8	+	22620681	22625295	1005	24	41	3.579	6.218	0.8	0.0258155	0.0631862	no	NA
AC187157.4_FG005	Refgen1	8	+	22630079	22634496	2577	56	40	3.257	2.366	-0.43	0.153333	0.262288	no	Putative uncharacterized protein
AC187207.3_FG006	Refgen1	1	-	13306336	13308009	1674	6	6	0.537	0.546	NA	NA	NA	NA	NA
AC187209.5_FG010	Refgen1	2	+	4690217	4690885	669	0	0	0	0	NA	NA	NA	NA	NA
AC187262.4_FG007	Refgen1	1	-	184545348	184545969	504	4	3	1.19	0.907	NA	NA	NA	NA	hypothetical protein LOC100272240
AC187459.3_FG004	Refgen1	7	-	77588798	77591140	2343	0	0	0	0	NA	NA	NA	NA	NA
AC187485.3_FG001	Refgen1	8	-	66013713	66015132	471	0	0	0	0	NA	NA	NA	NA	NA
AC187551.3_FG002	Refgen1	8	-	93244838	93246751	1914	41	47	3.211	3.743	0.24	0.456434	0.595016	no	NA
AC187560.5_FG003	Refgen1	7	+	5430468	5430797	330	0	1	0	0.462	NA	NA	NA	NA	NA
AC187789.3_FG001	Refgen1	9	+	30375399	30375656	258	0	0	0	0	NA	NA	NA	NA	NA
AC187802.3_FG008	Refgen1	6	+	157902302	157903580	840	0	0	0	0	NA	NA	NA	NA	NA
AC187809.3_FG005	Refgen1	9	+	43124790	43126544	1137	0	0	0	0	NA	NA	NA	NA	NA
AC187818.3_FG004	Refgen1	8	-	1340244	1340660	417	0	0	0	0	NA	NA	NA	NA	NA
AC187843.3_FG001	Refgen1	10	-	6920828	6922899	1107	0	0	0	0	NA	NA	NA	NA	NA
AC187843.3_FG010	Refgen1	10	-	6899853	6900983	1131	0	0	0	0	NA	NA	NA	NA	NA
AC187870.3_FG002	Refgen1	8	-	44989750	44991412	696	0	0	0	0	NA	NA	NA	NA	NA
AC187887.3_FG008	Refgen1	6	-	132485101	132485681	471	0	1	0	0.324	NA	NA	NA	NA	NA
AC187891.3_FG006	Refgen1	10	-	5929287	5930078	792	2	0	0.378	0	NA	NA	NA	NA	Putative uncharacterized protein
AC187899.3_FG002	Refgen1	10	+	79478679	79479285	480	0	0	0	0	NA	NA	NA	NA	NA
AC187910.5_FG002	Refgen1	8	+	148433459	148435635	501	0	0	0	0	NA	NA	NA	NA	NA
AC188000.3_FG003	Refgen1	10	-	91691195	91692022	828	0	0	0	0	NA	NA	NA	NA	NA
AC188001.3_FG009	Refgen1	8	-	168623112	168625873	660	0	0	0	0	NA	NA	NA	NA	NA
AC188023.3_FG005	Refgen1	6	-	165371683	165372418	456	137	130	45.03	43.451	-0.03	0.902627	0.949786	no	hypothetical protein LOC100277162
AC188023.3_FG011	Refgen1	6	+	165455624	165456829	687	0	0	0	0	NA	NA	NA	NA	NA
AC188134.2_FG007	Refgen1	5	-	210945826	210948496	207	6	24	4.344	17.671	NA	NA	NA	NA	NA
AC188583.4_FG003	Refgen1	9	-	10444878	10445458	549	0	0	0	0	NA	NA	NA	NA	NA
AC188710.4_FG006	Refgen1	6	+	129407453	129413526	4959	7	24	0.212	0.738	NA	NA	NA	NA	NA
AC188718.3_FG005	Refgen1	7	+	132505255	132507277	1500	0	0	0	0	NA	NA	NA	NA	NA
AC188718.3_FG011	Refgen1	7	+	132414358	132415456	912	0	0	0	0	NA	NA	NA	NA	NA
AC188718.3_FG015	Refgen1	7	-	132457586	132458431	846	0	1	0	0.18	NA	NA	NA	NA	NA
AC188722.3_FG002	Refgen1	10	-	34733575	34733868	294	0	0	0	0	NA	NA	NA	NA	NA
AC188752.3_FG002	Refgen1	4	+	224455036	224471552	4752	121	127	3.816	4.073	0.12	0.526159	0.657886	no	NA
AC188752.3_FG008	Refgen1	4	-	224395705	224397642	1881	1	0	0.08	0	NA	NA	NA	NA	NA
AC188753.3_FG004	Refgen1	3	+	158281796	158283593	777	0	0	0	0	NA	NA	NA	NA	NA
AC188756.2_FG001	Refgen1	9	-	38457915	38462433	2928	17	33	0.87	1.718	0.96	0.0227112	0.0569345	no	NA
AC188759.3_FG005	Refgen1	6	+	147879757	147887218	2472	221	244	13.399	15.044	0.19	0.164088	0.276841	no	NA
AC188838.3_FG005	Refgen1	6	+	150824496	150826127	1632	15	16	1.378	1.494	NA	NA	NA	NA	NA
AC188978.3_FG008	Refgen1	6	-	168700982	168701937	498	0	0	0	0	NA	NA	NA	NA	NA
AC188981.3_FG003	Refgen1	10	+	110975059	110978554	1092	40	62	5.49	8.653	0.67	0.0223563	0.056222	no	NA
AC189048.2_FG001	Refgen1	6	+	13402670	13404174	1410	0	0	0	0	NA	NA	NA	NA	NA
AC189060.4_FG007	Refgen1	3	+	225522599	225524715	723	0	0	0	0	NA	NA	NA	NA	NA
AC189280.3_FG001	Refgen1	4	+	170933099	170936789	639	0	0	0	0	NA	NA	NA	NA	NA
AC189677.4_FG001	Refgen1	4	+	162361813	162365001	525	35	30	9.992	8.709	-0.17	0.710105	0.810068	no	NA
AC189750.4_FG004	Refgen1	7	-	146706647	146709336	1548	101	41	9.779	4.037	-1.23	1.24379e-06	1.10131e-05	yes	adenosine 5'-phosphosulfate reductase-like1
AC189795.3_FG001	Refgen1	10	+	144491569	144494376	549	1	1	0.273	0.278	NA	NA	NA	NA	NA
AC189796.3_FG004	Refgen1	10	+	31153718	31157056	759	0	0	0	0	NA	NA	NA	NA	NA
AC189879.3_FG003	Refgen1	9	+	83498070	83503971	2955	102	146	5.173	7.53	0.56	0.00227932	0.00843529	no	hypothetical protein LOC100384364
AC190225.2_FG001	Refgen1	8	-	57833799	57835549	666	0	0	0	0	NA	NA	NA	NA	NA
AC190480.1_FG007	Refgen1	2	-	227903555	227905147	1593	0	0	0	0	NA	NA	NA	NA	NA
AC190498.1_FG007	Refgen1	1	-	261651082	261651704	336	0	0	0	0	NA	NA	NA	NA	NA
AC190507.1_FG007	Refgen1	2	-	84177261	84178064	486	0	0	0	0	NA	NA	NA	NA	NA
AC190526.3_FG004	Refgen1	5	-	155551436	155554832	618	18	15	4.365	3.699	NA	NA	NA	NA	NA
AC190550.3_FG003	Refgen1	1	-	141603719	141610202	906	0	0	0	0	NA	NA	NA	NA	NA
AC190560.2_FG002	Refgen1	3	-	188221247	188222682	375	0	0	0	0	NA	NA	NA	NA	NA
AC190570.3_FG003	Refgen1	1	-	230100196	230101875	762	0	0	0	0	NA	NA	NA	NA	NA
AC190587.3_FG005	Refgen1	9	-	110480914	110483623	2532	1	0	0.059	0	NA	NA	NA	NA	NA
AC190589.2_FG002	Refgen1	3	+	134772764	134773450	687	0	0	0	0	NA	NA	NA	NA	NA
AC190609.3_FG001	Refgen1	4	-	200028884	200032071	1215	1	0	0.123	0	NA	NA	NA	NA	NA
AC190609.3_FG002	Refgen1	4	-	200085901	200086947	210	270	250	192.702	181.443	-0.06	0.629619	0.745998	no	60S ribosomal protein L38
AC190609.3_FG003	Refgen1	4	+	200087976	200089404	789	17	29	3.229	5.602	0.78	0.075852	0.151686	no	LOC100285130
AC190609.3_FG004	Refgen1	4	-	200151059	200156190	1566	31	30	2.967	2.92	0	1	1	no	hypothetical protein LOC100383437
AC190609.3_FG005	Refgen1	4	+	200062339	200062746	408	5	4	1.837	1.494	NA	NA	NA	NA	NA
AC190613.3_FG001	Refgen1	2	+	76118876	76121782	2847	0	0	0	0	NA	NA	NA	NA	NA
AC190623.3_FG001	Refgen1	3	+	190263687	190264151	465	2745	2877	884.771	942.988	0.12	0.00280183	0.00999675	no	LOC100283816
AC190623.3_FG002	Refgen1	3	-	190269648	190272902	2337	0	0	0	0	NA	NA	NA	NA	NA
AC190628.4_FG007	Refgen1	4	-	180868424	180876912	2664	374	306	21.042	17.507	-0.24	0.0316523	0.0744818	no	NA
AC190630.2_FG001	Refgen1	10	+	18052263	18054646	504	0	0	0	0	NA	NA	NA	NA	NA
AC190632.2_FG004	Refgen1	4	+	150629981	150633407	645	0	0	0	0	NA	NA	NA	NA	NA
AC190636.3_FG005	Refgen1	5	-	813734	814828	1095	18	12	2.464	1.67	NA	NA	NA	NA	NA
AC190638.3_FG001	Refgen1	4	-	163887927	163888265	339	0	0	0	0	NA	NA	NA	NA	NA
AC190643.4_FG011	Refgen1	5	-	211411659	211412221	468	0	1	0	0.326	NA	NA	NA	NA	NA
AC190688.3_FG006	Refgen1	8	+	168849747	168850892	1146	0	0	0	0	NA	NA	NA	NA	NA
AC190695.3_FG003	Refgen1	1	+	75836275	75839118	1767	0	0	0	0	NA	NA	NA	NA	NA
AC190701.3_FG001	Refgen1	3	-	44199360	44205240	1419	0	0	0	0	NA	NA	NA	NA	NA
AC190716.3_FG001	Refgen1	5	-	8787594	8790226	786	0	0	0	0	NA	NA	NA	NA	NA
AC190734.2_FG003	Refgen1	5	-	11801898	11802977	1080	0	0	0	0	NA	NA	NA	NA	Putative teosinte branched2 Fragment
AC190749.3_FG006	Refgen1	4	+	161174170	161175229	411	0	4	0	1.483	NA	NA	NA	NA	NA
AC190750.2_FG014	Refgen1	2	+	2985108	2989267	1482	18	35	1.82	3.599	0.97	0.0186777	0.048382	no	F-box domain containing protein
AC190772.4_FG011	Refgen1	4	-	28196791	28197411	474	0	0	0	0	NA	NA	NA	NA	NA
AC190788.2_FG006	Refgen1	2	+	196763531	196776433	2070	43	28	3.113	2.062	-0.55	0.122292	0.220201	no	NA
AC190792.2_FG006	Refgen1	2	+	1296688	1297354	600	5	2	1.249	0.508	NA	NA	NA	NA	NA
AC190799.2_FG010	Refgen1	1	+	9038856	9039584	729	0	0	0	0	NA	NA	NA	NA	NA
AC190801.3_FG007	Refgen1	6	+	147142075	147144150	855	299	453	52.414	80.752	0.65	1.23455e-09	1.80499e-08	no	NA
AC190834.3_FG005	Refgen1	5	+	35790	37638	1173	0	0	0	0	NA	NA	NA	NA	NA
AC190838.3_FG004	Refgen1	1	+	16732982	16733835	702	20	24	4.27	5.211	0.3	0.547261	0.675934	no	NA
AC190858.3_FG005	Refgen1	2	+	58598607	58599854	645	0	0	0	0	NA	NA	NA	NA	NA
AC190885.4_FG006	Refgen1	4	+	184014382	184015110	729	1	2	0.206	0.418	NA	NA	NA	NA	NA
AC190913.3_FG002	Refgen1	9	-	19222244	19223289	930	0	0	0	0	NA	NA	NA	NA	NA
AC190933.3_FG004	Refgen1	3	-	16366345	16368148	489	9	13	2.759	4.052	NA	NA	NA	NA	NA
AC190961.3_FG006	Refgen1	2	+	136890612	136891271	660	0	0	0	0	NA	NA	NA	NA	NA
AC190982.3_FG008	Refgen1	3	-	3663203	3676950	2523	39	60	2.317	3.625	0.66	0.0266208	0.0647455	no	NA
AC190990.2_FG005	Refgen1	5	-	176249928	176251155	657	0	0	0	0	NA	NA	NA	NA	NA
AC190999.2_FG004	Refgen1	2	-	181030017	181040398	3525	28	39	1.191	1.686	0.51	0.144424	0.250523	no	NA
AC191009.3_FG004	Refgen1	1	+	297380856	297383007	330	96	57	43.601	26.326	-0.69	0.0034924	0.0120615	no	NA
AC191048.2_FG006	Refgen1	5	+	4142199	4142879	681	2	3	0.44	0.671	NA	NA	NA	NA	prenylated Rab receptor 2
AC191050.3_FG003	Refgen1	2	+	57601922	57604308	1689	1	2	0.089	0.18	NA	NA	NA	NA	NA
AC191064.3_FG007	Refgen1	9	+	119282582	119283796	1215	0	0	0	0	NA	NA	NA	NA	NA
AC191067.3_FG005	Refgen1	8	-	79481521	79482246	726	0	0	0	0	NA	NA	NA	NA	NA
AC191069.3_FG004	Refgen1	8	-	37661820	37664143	807	14	11	2.6	2.077	NA	NA	NA	NA	hypothetical protein LOC100277329
AC191070.3_FG006	Refgen1	4	-	42225649	42228077	1014	0	0	0	0	NA	NA	NA	NA	NA
AC191097.3_FG007	Refgen1	4	+	201075806	201076501	696	68	62	14.643	13.577	-0.08	0.792571	0.871749	no	NA
AC191107.4_FG002	Refgen1	2	+	165827662	165828449	699	0	0	0	0	NA	NA	NA	NA	NA
AC191113.2_FG002	Refgen1	2	-	6340337	6342313	1977	265	218	20.09	16.806	-0.23	0.0760705	0.151996	no	hypothetical protein LOC100383251 (LOC100383251), mRNA
AC191115.3_FG002	Refgen1	2	+	112897233	112906962	1260	0	0	0	0	NA	NA	NA	NA	NA
AC191116.3_FG001	Refgen1	6	+	133157562	133179488	2715	122	147	6.735	8.252	0.31	0.076989	0.153501	no	NA
AC191246.3_FG006	Refgen1	5	-	172225278	172227104	1827	22	29	1.805	2.419	0.43	0.327084	0.465799	no	hypothetical protein LOC100382300
AC191253.3_FG004	Refgen1	9	-	113245443	113246653	1002	5	2	0.748	0.304	NA	NA	NA	NA	NA
AC191254.3_FG001	Refgen1	5	-	175434713	175436248	588	2	0	0.51	0	NA	NA	NA	NA	NA
AC191264.3_FG002	Refgen1	7	+	144548540	144551110	534	0	0	0	0	NA	NA	NA	NA	NA
AC191279.2_FG001	Refgen1	10	-	6864830	6865711	882	0	0	0	0	NA	NA	NA	NA	NA
AC191279.2_FG003	Refgen1	10	-	6875965	6877053	1089	0	0	0	0	NA	NA	NA	NA	NA
AC191283.3_FG004	Refgen1	2	+	111090879	111096506	951	42	48	6.619	7.693	0.24	0.461379	0.599544	no	NA
AC191285.3_FG001	Refgen1	8	+	87051417	87052829	429	108	107	37.732	38.014	0.03	0.891585	0.94348	no	NA
AC191287.2_FG003	Refgen1	7	-	69376428	69377592	492	1	0	0.305	0	NA	NA	NA	NA	NA
AC191305.3_FG002	Refgen1	4	-	222979224	222980123	900	0	0	0	0	NA	NA	NA	NA	NA
AC191387.3_FG006	Refgen1	3	+	59493344	59494397	600	22	8	5.496	2.032	NA	NA	NA	NA	NA
AC191387.3_FG008	Refgen1	3	+	59515022	59515772	342	44	30	19.283	13.369	-0.49	0.162658	0.275115	no	NA
AC191387.3_FG009	Refgen1	3	-	59516524	59517675	1152	704	730	91.593	96.581	0.1	0.195613	0.316523	no	NA
AC191401.3_FG013	Refgen1	6	+	156754839	156755246	408	0	0	0	0	NA	NA	NA	NA	NA
AC191410.4_FG004	Refgen1	5	-	207290277	207291018	678	0	0	0	0	NA	NA	NA	NA	NA
AC191418.3_FG006	Refgen1	4	+	204766947	204770402	1053	17	56	2.42	8.105	1.71	1.77374e-06	1.52611e-05	yes	NA
AC191427.3_FG003	Refgen1	5	+	63008487	63009500	648	0	0	0	0	NA	NA	NA	NA	NA
AC191521.3_FG004	Refgen1	4	+	26705443	26717495	2862	7	18	0.367	0.959	NA	NA	NA	NA	NA
AC191534.3_FG003	Refgen1	7	+	29856872	29859545	1566	0	0	0	0	NA	NA	NA	NA	NA
AC191551.3_FG003	Refgen1	3	-	46672814	46676149	1191	6	0	0.755	0	NA	NA	NA	NA	NA
AC191555.2_FG002	Refgen1	9	+	129517372	129518564	1158	0	7	0	0.921	NA	NA	NA	NA	NA
AC191562.3_FG003	Refgen1	3	+	131004218	131005140	852	0	0	0	0	NA	NA	NA	NA	NA
AC191567.3_FG004	Refgen1	0	+	14501164	14505744	2481	36	33	2.175	2.027	-0.07	0.904295	0.950555	no	NA
AC191601.1_FG003	Refgen1	2	+	227415996	227417779	1659	4	9	0.361	0.827	NA	NA	NA	NA	NA
AC191628.3_FG002	Refgen1	9	-	148323133	148328181	969	82	83	12.683	13.055	0.06	0.815439	0.888305	no	NA
AC191650.3_FG003	Refgen1	3	-	149543135	149543842	708	0	0	0	0	NA	NA	NA	NA	NA
AC191676.3_FG011	Refgen1	5	+	15434019	15434913	783	8	6	1.531	1.168	NA	NA	NA	NA	NA
AC191687.3_FG005	Refgen1	2	-	176537748	176539267	1062	284	307	40.081	44.059	0.16	0.187992	0.307126	no	NA
AC191689.4_FG004	Refgen1	2	+	218707925	218708383	459	0	2	0	0.664	NA	NA	NA	NA	NA
AC191691.3_FG002	Refgen1	4	+	14136097	14137177	432	0	0	0	0	NA	NA	NA	NA	NA
AC191691.3_FG011	Refgen1	4	+	14194238	14194792	348	0	0	0	0	NA	NA	NA	NA	NA
AC191692.3_FG001	Refgen1	4	-	69272517	69273260	744	0	0	0	0	NA	NA	NA	NA	NA
AC191707.3_FG002	Refgen1	3	+	224530036	224532107	1275	21	30	2.469	3.586	0.54	0.207201	0.330219	no	NA
AC191708.3_FG001	Refgen1	10	+	78497053	78498153	1101	0	0	0	0	NA	NA	NA	NA	NA
AC191708.3_FG002	Refgen1	10	-	78544143	78545234	1092	0	0	0	0	NA	NA	NA	NA	NA
AC191719.3_FG002	Refgen1	4	+	20059045	20065009	1101	358	558	48.735	77.244	0.69	1.21286e-12	2.57441e-11	no	NA
AC191735.3_FG009	Refgen1	7	+	144336126	144336943	549	0	0	0	0	NA	NA	NA	NA	NA
AC191750.3_FG004	Refgen1	2	-	81543610	81546662	1638	4	8	0.366	0.744	NA	NA	NA	NA	NA
AC191771.3_FG008	Refgen1	5	-	59898348	59900091	390	14	12	5.38	4.69	NA	NA	NA	NA	hypothetical protein LOC100191281
AC191778.3_FG001	Refgen1	4	+	17858936	17859454	519	0	0	0	0	NA	NA	NA	NA	NA
AC191790.3_FG005	Refgen1	3	+	105531937	105533973	561	0	0	0	0	NA	NA	NA	NA	NA
AC191961.3_FG009	Refgen1	2	+	14797441	14801117	1176	0	2	0	0.259	NA	NA	NA	NA	NA
AC192244.3_FG001	Refgen1	5	-	75509545	75510926	684	173	139	37.908	30.973	-0.27	0.112733	0.206751	no	proteasome subunit alpha type 1 (LOC100282706), mRNA
AC192244.3_FG007	Refgen1	5	+	75529666	75532910	813	133	174	24.519	32.62	0.43	0.00864561	0.0257857	no	bifunctional coenzyme A synthase
AC192244.3_FG008	Refgen1	5	+	75525122	75528960	1188	92	84	11.607	10.777	-0.08	0.706973	0.807651	no	NA
AC192249.3_FG002	Refgen1	4	-	115254228	115259282	1284	14	5	1.634	0.594	NA	NA	NA	NA	NA
AC192283.3_FG005	Refgen1	10	+	113155692	113158633	1113	27	45	3.636	6.162	0.76	0.0251454	0.0617866	no	NA
AC192361.3_FG003	Refgen1	1	-	210799687	210801085	531	0	0	0	0	NA	NA	NA	NA	NA
AC192362.3_FG003	Refgen1	1	+	229458411	229461203	1326	37	36	4.182	4.138	0.01	1	1	no	hypothetical protein LOC100381472
AC192367.2_FG002	Refgen1	4	-	65798903	65802140	531	6	4	1.694	1.148	NA	NA	NA	NA	NA
AC192451.3_FG001	Refgen1	5	-	137120837	137123861	453	114	138	37.718	46.43	0.32	0.077957	0.155043	no	hypothetical protein LOC100191702
AC193324.3_FG002	Refgen1	10	+	137568169	137576884	3603	2	7	0.083	0.296	NA	NA	NA	NA	NA
AC193379.3_FG001	Refgen1	3	-	184347000	184354972	2940	41	73	2.09	3.784	0.86	0.00186645	0.00709182	no	NA
AC193475.3_FG008	Refgen1	2	+	14462543	14465140	2598	45	23	2.596	1.349	-0.89	0.0146681	0.0397503	no	NA
AC193500.3_FG003	Refgen1	1	+	1765068	1766219	1152	1	1	0.13	0.132	NA	NA	NA	NA	NA
AC193501.3_FG001	Refgen1	1	-	21758166	21762724	729	0	0	0	0	NA	NA	NA	NA	NA
AC193591.3_FG001	Refgen1	4	+	232393714	232394220	507	1	0	0.296	0	NA	NA	NA	NA	NA
AC193598.3_FG002	Refgen1	6	+	5508519	5512412	3894	2	0	0.077	0	NA	NA	NA	NA	NA
AC193606.2_FG001	Refgen1	5	-	78473200	78473943	744	0	0	0	0	NA	NA	NA	NA	NA
AC193606.2_FG005	Refgen1	5	-	78494470	78495462	993	0	0	0	0	NA	NA	NA	NA	NA
AC193625.3_FG010	Refgen1	4	-	12050353	12053507	936	0	0	0	0	NA	NA	NA	NA	NA
AC193630.3_FG003	Refgen1	9	-	19858654	19860493	1044	0	0	0	0	NA	NA	NA	NA	NA
AC193630.3_FG004	Refgen1	9	-	19855040	19855942	903	0	2	0	0.338	NA	NA	NA	NA	NA
AC193632.2_FG002	Refgen1	4	-	39617095	39619436	2031	32	64	2.361	4.803	1.03	0.000683888	0.00300089	no	NA
AC193645.3_FG006	Refgen1	10	+	82292501	82294105	1605	0	0	0	0	NA	NA	NA	NA	NA
AC193754.3_FG008	Refgen1	2	-	36367024	36369063	2040	14	25	1.029	1.868	NA	NA	NA	NA	NA
AC193767.3_FG003	Refgen1	10	+	148838873	148840060	1101	0	0	0	0	NA	NA	NA	NA	NA
AC193786.3_FG005	Refgen1	8	+	156609284	156610340	744	1	0	0.201	0	NA	NA	NA	NA	NA
AC194005.3_FG004	Refgen1	6	-	61633871	61634482	612	1	2	0.245	0.498	NA	NA	NA	NA	NA
AC194015.3_FG003	Refgen1	1	+	25034888	25035839	861	58	88	10.096	15.578	0.64	0.00794741	0.0240812	no	NA
AC194022.3_FG013	Refgen1	3	+	2745575	2745844	270	142	92	78.825	51.933	-0.57	0.00259451	0.00937071	no	Putative uncharacterized protein
AC194022.3_FG014	Refgen1	3	+	2747064	2750663	1194	0	0	0	0	NA	NA	NA	NA	NA
AC194031.3_FG002	Refgen1	9	-	38969829	38970554	726	0	0	0	0	NA	NA	NA	NA	NA
AC194032.3_FG010	Refgen1	9	-	147357190	147360156	606	0	0	0	0	NA	NA	NA	NA	NA
AC194040.3_FG003	Refgen1	6	+	113420819	113422410	399	0	0	0	0	NA	NA	NA	NA	NA
AC194104.3_FG007	Refgen1	10	+	4918584	4919612	1029	0	0	0	0	NA	NA	NA	NA	NA
AC194112.3_FG001	Refgen1	8	-	64383019	64384068	1050	0	0	0	0	NA	NA	NA	NA	NA
AC194131.3_FG001	Refgen1	7	+	37702543	37706065	2865	43	42	2.249	2.234	0.01	1	1	no	NA
AC194133.3_FG004	Refgen1	4	+	214342232	214344091	399	0	0	0	0	NA	NA	NA	NA	NA
AC194136.3_FG001	Refgen1	10	+	85354233	85354655	423	0	0	0	0	NA	NA	NA	NA	NA
AC194172.3_FG008	Refgen1	1	-	189950553	189951452	900	0	0	0	0	NA	NA	NA	NA	NA
AC194180.3_FG004	Refgen1	4	+	194947620	194948141	522	0	0	0	0	NA	NA	NA	NA	NA
AC194203.3_FG003	Refgen1	2	-	209462049	209462471	423	0	0	0	0	NA	NA	NA	NA	NA
AC194214.3_FG002	Refgen1	6	+	139285795	139289161	867	0	0	0	0	NA	NA	NA	NA	NA
AC194219.3_FG001	Refgen1	5	+	38500612	38502454	678	153	178	33.822	40.014	0.26	0.0991301	0.186928	no	NA
AC194242.4_FG001	Refgen1	6	+	73138503	73142632	1596	5	6	0.47	0.573	NA	NA	NA	NA	NA
AC194259.3_FG001	Refgen1	4	-	246957109	246960121	1167	0	0	0	0	NA	NA	NA	NA	NA
AC194264.3_FG006	Refgen1	1	+	204927197	204931022	708	15	13	3.175	2.799	NA	NA	NA	NA	NA
AC194272.3_FG003	Refgen1	1	+	195424173	195425001	402	75	96	27.963	36.397	0.4	0.0782888	0.155591	no	NA
AC194273.3_FG006	Refgen1	10	-	78714081	78715175	1095	0	0	0	0	NA	NA	NA	NA	NA
AC194273.3_FG007	Refgen1	10	-	78780139	78781267	1092	0	0	0	0	NA	NA	NA	NA	NA
AC194284.3_FG004	Refgen1	3	-	193174862	193175674	183	9	12	7.371	9.994	NA	NA	NA	NA	NA
AC194298.3_FG005	Refgen1	3	-	202794635	202794823	189	9	5	7.137	4.032	NA	NA	NA	NA	Putative uncharacterized protein
AC194338.3_FG008	Refgen1	5	-	16506500	16507432	741	0	0	0	0	NA	NA	NA	NA	NA
AC194341.4_FG002	Refgen1	8	-	140005902	140008020	369	240	149	97.482	61.543	-0.64	1.91095e-05	0.000129288	no	hydrogen-transporting ATP synthase, rotational mechanism
AC194341.4_FG003	Refgen1	8	+	140002740	140004675	1821	0	0	0	0	NA	NA	NA	NA	membrane protein-like
AC194341.4_FG004	Refgen1	8	+	139989859	139991601	1488	8	17	0.806	1.741	NA	NA	NA	NA	hypothetical protein LOC100279285
AC194350.3_FG001	Refgen1	6	+	118318310	118321494	990	0	0	0	0	NA	NA	NA	NA	NA
AC194355.3_FG002	Refgen1	8	-	52665854	52666795	693	3	0	0.649	0	NA	NA	NA	NA	NA
AC194362.3_FG003	Refgen1	3	-	230425321	230426723	651	1	0	0.23	0	NA	NA	NA	NA	NA
AC194363.3_FG005	Refgen1	6	+	100079969	100084693	1293	33	62	3.825	7.308	0.94	0.001947	0.00735611	no	NA
AC194365.3_FG002	Refgen1	2	-	84213449	84214045	597	96	80	24.101	20.424	-0.21	0.328172	0.467189	no	NA
AC194381.3_FG011	Refgen1	1	+	289210515	289213832	654	101	117	23.146	27.266	0.26	0.198155	0.319371	no	NA
AC194389.3_FG001	Refgen1	1	-	78968226	78970000	621	38	66	9.171	16.198	0.83	0.00424704	0.0141959	no	LOC100281593
AC194395.4_FG002	Refgen1	1	+	30077300	30077922	534	0	2	0	0.571	NA	NA	NA	NA	NA
AC194405.3_FG021	Refgen1	8	+	170329273	170333597	2253	2	0	0.133	0	NA	NA	NA	NA	NA
AC194409.3_FG005	Refgen1	5	-	152267917	152273820	708	114	120	24.133	25.833	0.12	0.556353	0.683831	no	NA
AC194425.3_FG005	Refgen1	3	+	189527051	189527359	213	30	8	21.11	5.724	NA	NA	NA	NA	NA
AC194439.3_FG002	Refgen1	8	-	84211227	84214198	843	0	0	0	0	NA	NA	NA	NA	NA
AC194439.3_FG003	Refgen1	8	-	84203709	84205392	942	0	0	0	0	NA	NA	NA	NA	NA
AC194457.3_FG001	Refgen1	7	+	41756534	41758036	1503	2	0	0.199	0	NA	NA	NA	NA	NA
AC194461.3_FG004	Refgen1	4	+	236335650	236336111	462	474	572	153.772	188.701	0.32	0.000373288	0.00177729	no	NA
AC194467.3_FG006	Refgen1	10	+	48357622	48361372	1695	16	13	1.415	1.169	NA	NA	NA	NA	NA
AC194472.3_FG001	Refgen1	2	+	213041876	213043158	225	0	0	0	0	NA	NA	NA	NA	NA
AC194587.2_FG001	Refgen1	1	-	160057519	160059864	786	0	0	0	0	NA	NA	NA	NA	NA
AC194592.2_FG001	Refgen1	6	-	122521377	122522689	915	0	0	0	0	NA	NA	NA	NA	NA
AC194633.3_FG014	Refgen1	8	+	8477067	8478578	825	1	6	0.182	1.108	NA	NA	NA	NA	NA
AC194670.2_FG001	Refgen1	4	-	212112791	212115341	495	0	0	0	0	NA	NA	NA	NA	NA
AC194671.1_FG004	Refgen1	5	+	129947714	129948683	405	320	297	118.423	111.769	-0.06	0.629009	0.745469	no	NA
AC194734.3_FG004	Refgen1	3	-	23175279	23175689	411	0	0	0	0	NA	NA	NA	NA	NA
AC194824.2_FG003	Refgen1	6	-	120568878	120571271	1539	0	0	0	0	NA	NA	NA	NA	NA
AC194828.3_FG004	Refgen1	6	+	150907106	150907903	525	0	0	0	0	NA	NA	NA	NA	NA
AC194828.3_FG012	Refgen1	6	-	151034074	151034664	591	0	0	0	0	NA	NA	NA	NA	NA
AC194852.3_FG007	Refgen1	6	+	103790952	103792499	1350	0	0	0	0	NA	NA	NA	NA	NA
AC194853.1_FG002	Refgen1	6	-	76318966	76319405	285	0	0	0	0	NA	NA	NA	NA	NA
AC194854.3_FG006	Refgen1	1	+	274089343	274089907	474	7	7	2.213	2.251	NA	NA	NA	NA	NA
AC194856.3_FG002	Refgen1	1	+	115527824	115528030	207	0	0	0	0	NA	NA	NA	NA	NA
AC194856.3_FG007	Refgen1	1	+	115534587	115534793	207	0	0	0	0	NA	NA	NA	NA	NA
AC194863.3_FG006	Refgen1	1	+	8514856	8516638	1482	0	0	0	0	NA	NA	NA	NA	NA
AC194865.2_FG004	Refgen1	3	+	134634432	134636690	2259	10	2	0.663	0.135	NA	NA	NA	NA	NA
AC194888.3_FG004	Refgen1	7	+	143454809	143455924	1116	0	1	0	0.137	NA	NA	NA	NA	NA
AC194898.3_FG003	Refgen1	8	-	43053712	43056292	2199	3	20	0.204	1.386	NA	NA	NA	NA	NA
AC194914.3_FG002	Refgen1	1	-	98402060	98402698	639	74	41	17.357	9.779	-0.79	0.00376071	0.0128509	no	cyclase/dehydrase family protein
AC194965.4_FG001	Refgen1	6	+	127625106	127628794	1686	145	155	12.89	14.012	0.14	0.418904	0.559766	no	NA
AC194965.4_FG002	Refgen1	6	-	127630126	127632733	564	444	415	117.99	112.147	-0.05	0.632852	0.748728	no	NA
AC194965.4_FG004	Refgen1	6	-	127728300	127729502	432	25	21	8.674	7.409	-0.19	0.66072	0.77044	no	NA
AC194970.5_FG001	Refgen1	2	+	204322301	204323641	1104	688	339	93.403	46.8	-0.97	1.39993e-25	7.24927e-24	yes	Putative geranylgeranyl pyrophosphate synthase 1
AC194970.5_FG002	Refgen1	2	+	204332914	204334079	951	9	12	1.418	1.923	NA	NA	NA	NA	NA
AC194970.5_FG003	Refgen1	2	-	204336844	204340049	660	48	19	10.9	4.388	-1.25	0.000831506	0.00353887	no	NA
AC194970.5_FG004	Refgen1	2	+	204424251	204435697	2166	61	60	4.221	4.222	0.02	1	1	no	NA
AC194970.5_FG005	Refgen1	2	-	204285538	204290080	1035	178	220	25.776	32.397	0.35	0.016037	0.0427875	no	LOC100284122
AC194970.5_FG009	Refgen1	2	+	204300275	204303338	1437	47	44	4.902	4.667	-0.05	0.916694	0.95781	no	ruvB-like 2
AC194972.2_FG001	Refgen1	3	+	211271480	211272373	894	0	0	0	0	NA	NA	NA	NA	NA
AC194977.2_FG004	Refgen1	7	-	154331843	154338113	948	0	0	0	0	NA	NA	NA	NA	NA
AC195135.3_FG002	Refgen1	1	-	287703406	287703678	273	0	0	0	0	NA	NA	NA	NA	NA
AC195138.3_FG004	Refgen1	7	-	157912039	157912510	417	6	4	2.157	1.462	NA	NA	NA	NA	NA
AC195141.3_FG002	Refgen1	2	+	57330941	57332634	1536	2	0	0.195	0	NA	NA	NA	NA	NA
AC195147.3_FG001	Refgen1	7	-	162399102	162400145	1044	0	0	0	0	NA	NA	NA	NA	MAB1
AC195147.3_FG008	Refgen1	7	-	162378681	162379151	471	0	0	0	0	NA	NA	NA	NA	NA
AC195154.3_FG004	Refgen1	3	+	201711823	201718702	3546	88	79	3.72	3.396	-0.11	0.643083	0.756839	no	NA
AC195161.2_FG002	Refgen1	1	-	211751452	211753272	1518	2	14	0.197	1.406	NA	NA	NA	NA	NA
AC195161.2_FG003	Refgen1	1	+	211756014	211758918	1083	1	6	0.138	0.844	NA	NA	NA	NA	NA
AC195172.3_FG001	Refgen1	8	+	4421429	4426864	1440	22	16	2.29	1.693	NA	NA	NA	NA	NA
AC195230.2_FG003	Refgen1	8	+	25963195	25964046	633	0	0	0	0	NA	NA	NA	NA	NA
AC195235.3_FG003	Refgen1	2	-	13369804	13378138	1320	3	4	0.341	0.462	NA	NA	NA	NA	NA
AC195235.3_FG010	Refgen1	2	+	13281692	13284733	756	151	199	29.936	40.119	0.44	0.00454224	0.0149958	no	NA
AC195320.3_FG003	Refgen1	2	+	34248059	34249819	1761	1	0	0.085	0	NA	NA	NA	NA	NA
AC195321.3_FG001	Refgen1	9	+	37603558	37607876	1770	0	0	0	0	NA	NA	NA	NA	NA
AC195340.3_FG001	Refgen1	5	-	5422564	5424949	1353	2176	2244	241.047	252.781	0.09	0.0351594	0.0811475	no	Tubulin alpha-3 chain (Alpha-3-tubulin)
AC195340.3_FG002	Refgen1	5	+	5413043	5415875	672	140	146	31.225	33.113	0.11	0.55439	0.68222	no	NADH-ubiquinone oxidoreductase 23 kDa subunit
AC195340.3_FG004	Refgen1	5	-	5367137	5372123	3444	213	177	9.27	7.833	-0.22	0.141898	0.24715	no	hypothetical protein LOC100382108
AC195340.3_FG005	Refgen1	5	-	5373824	5375894	453	0	1	0	0.336	NA	NA	NA	NA	NA
AC195343.3_FG002	Refgen1	7	+	66659836	66660299	339	1	0	0.442	0	NA	NA	NA	NA	NA
AC195347.4_FG004	Refgen1	5	+	180110191	180111642	1452	187	165	19.303	17.32	-0.13	0.394139	0.535008	no	hypothetical protein LOC100278330
AC195366.3_FG002	Refgen1	1	+	291348411	291349703	243	26	30	16.036	18.816	0.25	0.593351	0.715787	no	NA
AC195389.3_FG001	Refgen1	6	+	10129622	10130689	957	0	0	0	0	NA	NA	NA	NA	NA
AC195395.3_FG003	Refgen1	5	+	9278776	9279996	1221	135	108	16.571	13.481	-0.27	0.140669	0.24524	no	NA
AC195458.3_FG001	Refgen1	5	+	204404254	204404514	261	0	0	0	0	NA	NA	NA	NA	NA
AC195484.3_FG003	Refgen1	7	+	82409636	82412271	2340	1	0	0.064	0	NA	NA	NA	NA	NA
AC195485.3_FG002	Refgen1	3	-	86374152	86375924	1260	0	0	0	0	NA	NA	NA	NA	NA
AC195580.2_FG010	Refgen1	9	-	8896189	8896521	333	0	0	0	0	NA	NA	NA	NA	NA
AC195587.4_FG002	Refgen1	6	+	77340339	77344487	828	0	0	0	0	NA	NA	NA	NA	NA
AC195587.4_FG004	Refgen1	6	+	77451666	77461186	3939	5	19	0.19	0.735	NA	NA	NA	NA	NA
AC195685.3_FG001	Refgen1	5	+	137684759	137688751	1032	0	0	0	0	NA	NA	NA	NA	NA
AC195785.3_FG004	Refgen1	1	-	180663593	180666289	2697	17	22	0.945	1.243	NA	NA	NA	NA	hypothetical protein LOC100279369
AC195794.3_FG002	Refgen1	1	+	207302323	207303021	699	0	0	0	0	NA	NA	NA	NA	NA
AC195803.2_FG003	Refgen1	2	-	192111784	192114454	594	10	11	2.523	2.822	NA	NA	NA	NA	NA
AC195825.3_FG001	Refgen1	2	-	176152209	176155132	1911	0	0	0	0	NA	NA	NA	NA	NA
AC195826.2_FG006	Refgen1	7	+	116123269	116124108	840	0	0	0	0	NA	NA	NA	NA	NA
AC195860.3_FG002	Refgen1	6	+	164008014	164009846	1833	1	0	0.082	0	NA	NA	NA	NA	NA
AC195860.3_FG005	Refgen1	6	+	163969531	163971182	315	1	0	0.476	0	NA	NA	NA	NA	Cytochrome c oxidase assembly protein COX19
AC195864.3_FG016	Refgen1	7	-	161781646	161783753	801	49	26	9.169	4.947	-0.84	0.0147704	0.0399673	no	NA
AC195864.3_FG017	Refgen1	7	+	161779554	161781212	1659	5	20	0.452	1.837	NA	NA	NA	NA	NA
AC195874.2_FG002	Refgen1	2	-	216525742	216531359	432	40	43	13.878	15.171	0.15	0.66158	0.770898	no	AP-2 complex subunit sigma-1 (Sigma2-adaptin)(Plasma membrane adaptor AP-2 17 kDa protein)(Clathrin assembly protein 2 small chain)(Clathrin coat assembly protein AP17)(Clathrin coat-associated protein AP17)
AC195940.2_FG003	Refgen1	1	-	7659735	7663387	834	30	47	5.391	8.589	0.68	0.0402367	0.0907177	no	NA
AC195957.3_FG003	Refgen1	5	+	87847342	87848490	300	2	4	0.999	2.032	NA	NA	NA	NA	NA
AC195980.2_FG004	Refgen1	3	-	139996394	139999150	1959	1	10	0.077	0.778	NA	NA	NA	NA	NA
AC196006.3_FG007	Refgen1	2	+	229350903	229352559	888	9	9	1.519	1.545	NA	NA	NA	NA	NA
AC196008.1_FG004	Refgen1	5	+	206967571	206968251	681	1	0	0.22	0	NA	NA	NA	NA	NA
AC196009.2_FG007	Refgen1	3	-	164682961	164683981	450	13	12	4.33	4.064	NA	NA	NA	NA	NA
AC196025.3_FG002	Refgen1	5	-	70381054	70381735	462	0	0	0	0	NA	NA	NA	NA	NA
AC196025.3_FG008	Refgen1	5	+	70312524	70312928	405	0	0	0	0	NA	NA	NA	NA	NA
AC196025.3_FG009	Refgen1	5	-	70314446	70315524	642	0	0	0	0	NA	NA	NA	NA	NA
AC196025.3_FG010	Refgen1	5	+	70318488	70319068	453	0	0	0	0	NA	NA	NA	NA	NA
AC196025.3_FG011	Refgen1	5	+	70325661	70336496	1218	0	0	0	0	NA	NA	NA	NA	NA
AC196025.3_FG012	Refgen1	5	+	70344617	70345030	414	0	0	0	0	NA	NA	NA	NA	NA
AC196025.3_FG013	Refgen1	5	-	70346001	70347078	642	0	0	0	0	NA	NA	NA	NA	NA
AC196053.3_FG002	Refgen1	7	+	153851058	153853939	966	129	169	20.015	26.664	0.43	0.010677	0.0306585	no	NA
AC196059.3_FG003	Refgen1	9	-	146322629	146325253	714	1243	1108	260.924	236.516	-0.12	0.0476527	0.104434	no	NA
AC196066.3_FG004	Refgen1	1	-	247545036	247550371	810	97	108	17.949	20.322	0.2	0.328579	0.467729	no	NA
AC196090.3_FG003	Refgen1	9	+	149762757	149765109	1050	81	168	11.562	24.386	1.09	8.04469e-09	1.05534e-07	yes	NA
AC196090.3_FG006	Refgen1	9	+	149691827	149694073	2247	55	27	3.669	1.831	-0.95	0.00383118	0.0130589	no	hypothetical protein LOC100193436
AC196104.3_FG002	Refgen1	8	+	96179610	96180094	312	1	0	0.48	0	NA	NA	NA	NA	NA
AC196106.2_FG001	Refgen1	2	+	224147225	224149150	1926	0	0	0	0	NA	NA	NA	NA	NA
AC196125.3_FG002	Refgen1	1	+	295085374	295086573	426	582	564	204.765	201.785	0	1	1	no	NA
AC196156.3_FG003	Refgen1	1	-	260213137	260213418	282	30	32	15.945	17.295	0.14	0.705606	0.806586	no	Putative uncharacterized protein
AC196161.3_FG002	Refgen1	1	+	45864168	45865629	537	0	0	0	0	NA	NA	NA	NA	NA
AC196161.3_FG008	Refgen1	1	+	45779361	45789333	1161	27	16	3.486	2.1	-0.67	0.128474	0.228727	no	NA
AC196170.2_FG003	Refgen1	3	+	136886759	136887685	927	0	0	0	0	NA	NA	NA	NA	NA
AC196259.2_FG010	Refgen1	8	+	143521168	143521641	474	0	0	0	0	NA	NA	NA	NA	NA
AC196268.3_FG003	Refgen1	6	+	1987480	1988160	528	30	24	8.516	6.928	-0.26	0.499744	0.63491	no	NA
AC196278.2_FG005	Refgen1	4	+	214030975	214032465	1350	0	0	0	0	NA	NA	NA	NA	NA
AC196292.3_FG004	Refgen1	5	+	41261199	41265122	732	40	68	8.19	14.158	0.8	0.00503106	0.0163144	no	NA
AC196394.3_FG002	Refgen1	1	+	16576428	16577648	480	1	10	0.312	3.175	NA	NA	NA	NA	NA
AC196412.3_FG001	Refgen1	4	+	35109588	35111120	1533	0	0	0	0	NA	NA	NA	NA	NA
AC196417.3_FG008	Refgen1	3	+	151498813	151499164	270	0	0	0	0	NA	NA	NA	NA	NA
AC196420.4_FG002	Refgen1	2	-	71159808	71164119	729	0	0	0	0	NA	NA	NA	NA	NA
AC196426.3_FG007	Refgen1	8	-	137700679	137706762	2235	310	293	20.789	19.981	-0.03	0.775736	0.85961	no	NA
AC196433.2_FG004	Refgen1	8	+	14814994	14816621	1521	156	99	15.372	9.92	-0.6	0.00108656	0.00443913	no	NA
AC196437.3_FG001	Refgen1	9	-	36435524	36443246	1113	0	0	0	0	NA	NA	NA	NA	NA
AC196465.3_FG002	Refgen1	8	+	148525897	148526523	627	7	4	1.673	0.972	NA	NA	NA	NA	NA
AC196475.3_FG004	Refgen1	4	-	32103468	32105339	1095	3864	2540	528.889	353.54	-0.56	7.98e-53	1.00356e-50	no	Caffeic acid 3-O-methyltransferase (EC 2.1.1.68)(S-adenosysl-L-methionine:caffeic acid 3-O-methyltransferase)(CAOMT)(COMT)
AC196489.3_FG002	Refgen1	2	-	63823115	63823615	501	313	202	93.637	61.452	-0.58	6.51335e-06	4.98136e-05	no	LOC100282351
AC196637.2_FG002	Refgen1	3	-	168870690	168872252	1563	4	6	0.384	0.585	NA	NA	NA	NA	NA
AC196708.3_FG006	Refgen1	4	+	243299895	243300293	399	1	0	0.376	0	NA	NA	NA	NA	NA
AC196726.2_FG001	Refgen1	7	+	133985434	133985688	255	0	1	0	0.598	NA	NA	NA	NA	Putative uncharacterized protein
AC196779.3_FG003	Refgen1	6	+	68392319	68393546	900	12	3	1.998	0.508	NA	NA	NA	NA	acid phosphatase 1
AC196789.3_FG001	Refgen1	1	+	31097598	31099107	1200	0	0	0	0	NA	NA	NA	NA	NA
AC196954.2_FG011	Refgen1	2	-	8122212	8124941	711	0	0	0	0	NA	NA	NA	NA	NA
AC196954.2_FG012	Refgen1	2	-	8126170	8126966	594	0	0	0	0	NA	NA	NA	NA	NA
AC196956.3_FG003	Refgen1	7	+	67424328	67426976	1047	2	3	0.286	0.437	NA	NA	NA	NA	NA
AC196961.2_FG003	Refgen1	7	+	142518242	142518553	312	2	3	0.961	1.466	NA	NA	NA	NA	Histone H4
AC196971.3_FG002	Refgen1	4	+	229379571	229385431	2019	170	237	12.62	17.891	0.52	0.000286267	0.00141367	no	NA
AC196974.3_FG008	Refgen1	4	-	6158065	6158815	693	0	0	0	0	NA	NA	NA	NA	NA
AC196978.5_FG001	Refgen1	10	-	4112473	4119687	1995	169	236	12.697	18.03	0.53	0.000276544	0.00137254	no	NA
AC196978.5_FG002	Refgen1	10	+	4111062	4111748	687	5	0	1.091	0	NA	NA	NA	NA	NA
AC196978.5_FG007	Refgen1	10	-	4041846	4043300	696	0	0	0	0	NA	NA	NA	NA	NA
AC197034.3_FG003	Refgen1	5	+	6883461	6884782	393	0	0	0	0	NA	NA	NA	NA	NA
AC197041.3_FG001	Refgen1	6	+	7326927	7327709	783	0	0	0	0	NA	NA	NA	NA	NA
AC197047.3_FG001	Refgen1	4	+	83282665	83283328	558	10	5	2.686	1.366	NA	NA	NA	NA	hypothetical protein LOC100277785 (LOC100277785), mRNA
AC197056.3_FG005	Refgen1	2	+	75366464	75370830	1665	40	53	3.601	4.852	0.44	0.146604	0.253498	no	NA
AC197075.3_FG006	Refgen1	1	-	3873353	3878726	1737	8	6	0.69	0.526	NA	NA	NA	NA	NA
AC197118.3_FG005	Refgen1	5	-	78117505	78118779	1275	168	87	19.749	10.4	-0.89	1.62856e-06	1.40845e-05	yes	Antigenic determinant of rec-A proteinPutative uncharacterized protein ;
AC197122.3_FG003	Refgen1	5	+	15591210	15606512	1776	87	82	7.342	7.037	-0.04	0.877993	0.935819	no	NA
AC197124.3_FG004	Refgen1	6	-	112070616	112071702	213	0	0	0	0	NA	NA	NA	NA	NA
AC197143.3_FG007	Refgen1	6	+	168494513	168495283	771	0	0	0	0	NA	NA	NA	NA	PR-1-like protein Fragment
AC197145.4_FG003	Refgen1	4	+	71834189	71836507	996	29	28	4.364	4.285	0	1	1	no	NA
AC197146.3_FG001	Refgen1	10	-	1965629	1967455	1827	3	0	0.246	0	NA	NA	NA	NA	hypothetical protein LOC100383027
AC197146.3_FG002	Refgen1	10	+	1952262	1953225	870	157	137	27.047	24.001	-0.15	0.382193	0.522363	no	R2R3MYB-domain protein Fragment
AC197146.3_FG003	Refgen1	10	+	1945693	1949239	906	28	33	4.632	5.551	0.28	0.446173	0.586136	no	NA
AC197150.3_FG003	Refgen1	3	-	107376153	107378258	2106	1	0	0.071	0	NA	NA	NA	NA	NA
AC197151.3_FG003	Refgen1	8	-	28451621	28451977	357	10	5	4.198	2.135	NA	NA	NA	NA	NA
AC197229.3_FG004	Refgen1	2	-	79744022	79745355	765	40	42	7.837	8.368	0.12	0.741238	0.834935	no	NA
AC197230.3_FG001	Refgen1	3	+	18812924	18815087	507	0	0	0	0	NA	NA	NA	NA	NA
AC197246.3_FG001	Refgen1	1	-	191978102	191980382	651	56	35	12.893	8.194	-0.62	0.0460565	0.101448	no	ras-related protein ARA-4
AC197246.3_FG002	Refgen1	1	+	191840122	191842304	1614	128	67	11.886	6.327	-0.88	3.94804e-05	0.000247136	yes	NA
AC197246.3_FG003	Refgen1	1	-	191886760	191889389	402	73	53	27.217	20.094	-0.41	0.129529	0.230054	no	60S ribosomal protein L32 Fragment
AC197264.3_FG005	Refgen1	1	+	10395829	10404912	2091	64	64	4.587	4.665	0.05	0.860176	0.921947	no	NA
AC197266.3_FG010	Refgen1	6	+	30862528	30863801	579	3	0	0.777	0	NA	NA	NA	NA	NA
AC197326.4_FG003	Refgen1	1	-	270999905	271002291	738	17	16	3.453	3.304	NA	NA	NA	NA	NA
AC197541.3_FG004	Refgen1	3	-	167438888	167440890	846	1	0	0.177	0	NA	NA	NA	NA	NA
AC197545.3_FG002	Refgen1	1	-	27506401	27511838	1281	42	37	4.914	4.402	-0.13	0.736082	0.830805	no	NA
AC197555.3_FG008	Refgen1	3	+	225920322	225921245	924	125	92	20.276	15.175	-0.39	0.0488694	0.106546	no	DNA-damage-repair/toleration protein DRT102
AC197575.3_FG008	Refgen1	2	+	32952047	32954931	513	0	0	0	0	NA	NA	NA	NA	NA
AC197577.2_FG002	Refgen1	10	+	120483625	120484230	495	0	0	0	0	NA	NA	NA	NA	NA
AC197578.4_FG001	Refgen1	3	-	191000002	191005208	1818	15	13	1.237	1.09	NA	NA	NA	NA	hypothetical protein LOC100280148
AC197578.4_FG003	Refgen1	3	-	190946723	190949009	702	31	29	6.619	6.296	-0.05	0.898245	0.946695	no	NA
AC197666.4_FG005	Refgen1	8	-	5149759	5150194	327	13	18	5.959	8.39	NA	NA	NA	NA	NA
AC197672.3_FG002	Refgen1	10	+	98001579	98020537	6978	621	823	13.338	17.976	0.45	2.96728e-09	4.13244e-08	no	Acetyl CoA carboxylase Fragment (EC 6.4.1.2)
AC197699.3_FG002	Refgen1	9	+	16973853	16977743	1947	3	1	0.231	0.078	NA	NA	NA	NA	NA
AC197699.3_FG003	Refgen1	9	-	16979494	16983727	2067	53	52	3.843	3.834	0.02	1	1	no	Putative uncharacterized protein
AC197699.3_FG005	Refgen1	9	-	16897214	16897540	327	0	0	0	0	NA	NA	NA	NA	NA
AC197699.3_FG007	Refgen1	9	+	16916883	16924632	1215	2	1	0.247	0.125	NA	NA	NA	NA	NA
AC197699.3_FG008	Refgen1	9	-	16928300	16929657	639	0	0	0	0	NA	NA	NA	NA	NA
AC197699.3_FG009	Refgen1	9	-	16936543	16936872	330	0	0	0	0	NA	NA	NA	NA	NA
AC197699.3_FG010	Refgen1	9	-	16939766	16940089	324	0	0	0	0	NA	NA	NA	NA	NA
AC197705.4_FG001	Refgen1	8	+	116734266	116736402	1830	1	0	0.082	0	NA	NA	NA	NA	Pyruvate decarboxylase isozyme 1 (PDC)(EC 4.1.1.1)
AC197705.4_FG003	Refgen1	8	-	116746844	116747442	525	0	0	0	0	NA	NA	NA	NA	hypothetical protein LOC100279055
AC197705.4_FG004	Refgen1	8	+	116748848	116749369	522	0	0	0	0	NA	NA	NA	NA	NA
AC197705.4_FG006	Refgen1	8	+	116781849	116783501	1653	107	119	9.702	10.972	0.2	0.318403	0.456506	no	NA
AC197705.4_FG007	Refgen1	8	-	116786653	116790335	1584	136	131	12.868	12.605	-0.01	1	1	no	hypothetical protein LOC100274105
AC197705.4_FG008	Refgen1	8	+	116790942	116792291	1350	0	0	0	0	NA	NA	NA	NA	NA
AC197705.4_FG011	Refgen1	8	+	116673465	116686028	2895	485	586	25.109	30.851	0.32	0.000307052	0.00150344	no	NA
AC197709.3_FG004	Refgen1	2	+	43249935	43250406	375	12	7	4.796	2.845	NA	NA	NA	NA	NA
AC197717.3_FG002	Refgen1	9	+	142401011	142403403	1182	58	62	7.354	7.995	0.14	0.648215	0.760898	no	Ninja-family protein 1
AC197718.3_FG002	Refgen1	3	-	159005193	159005798	351	0	0	0	0	NA	NA	NA	NA	NA
AC197757.3_FG003	Refgen1	4	-	25210214	25210690	477	0	0	0	0	NA	NA	NA	NA	NA
AC197758.3_FG004	Refgen1	4	+	183004728	183007055	1002	3	0	0.449	0	NA	NA	NA	NA	peroxidase 52
AC197764.4_FG003	Refgen1	5	+	36142283	36143124	597	0	1	0	0.255	NA	NA	NA	NA	NA
AC197779.3_FG001	Refgen1	4	-	66058503	66060331	1137	49	36	6.459	4.826	-0.39	0.233014	0.360669	no	NA
AC197783.3_FG005	Refgen1	4	+	205556001	205558498	573	0	0	0	0	NA	NA	NA	NA	NA
AC197847.3_FG004	Refgen1	5	-	49395362	49396847	1395	408	252	43.836	27.533	-0.65	1.46566e-08	1.84738e-07	no	NA
AC197901.3_FG003	Refgen1	9	+	115202252	115202593	342	0	1	0	0.446	NA	NA	NA	NA	NA
AC197919.2_FG001	Refgen1	9	+	112102767	112104591	747	2	5	0.401	1.02	NA	NA	NA	NA	NA
AC198122.3_FG002	Refgen1	9	+	66408348	66412120	957	0	0	0	0	NA	NA	NA	NA	NA
AC198131.4_FG008	Refgen1	4	+	245259594	245262314	981	25	26	3.82	4.039	0.1	0.888828	0.941993	no	NA
AC198169.4_FG004	Refgen1	5	-	187727793	187729607	1776	999	1346	84.307	115.511	0.48	1.60489e-15	4.3436e-14	no	NA
AC198174.4_FG001	Refgen1	5	-	198150048	198151975	1779	2	0	0.168	0	NA	NA	NA	NA	NA
AC198175.3_FG003	Refgen1	7	+	77155679	77159394	615	30	32	7.311	7.93	0.14	0.705606	0.806586	no	NA
AC198179.4_FG001	Refgen1	6	-	24753670	24755726	1572	0	0	0	0	NA	NA	NA	NA	Putative uncharacterized protein
AC198179.4_FG002	Refgen1	6	-	24788228	24789221	900	0	0	0	0	NA	NA	NA	NA	NA
AC198206.5_FG001	Refgen1	5	+	127741239	127749742	1752	59	41	5.047	3.567	-0.47	0.10982	0.202631	no	NA
AC198223.3_FG001	Refgen1	2	-	132100497	132100811	315	0	0	0	0	NA	NA	NA	NA	NA
AC198230.4_FG003	Refgen1	8	-	46791272	46791764	237	0	0	0	0	NA	NA	NA	NA	NA
AC198324.3_FG003	Refgen1	4	-	133587290	133589008	1719	0	0	0	0	NA	NA	NA	NA	NA
AC198353.5_FG001	Refgen1	2	+	185860137	185862700	1488	16	33	1.612	3.38	1.05	0.0143326	0.039018	no	NA
AC198353.5_FG004	Refgen1	2	+	185875079	185889243	1602	308	322	28.816	30.635	0.11	0.339077	0.479085	no	NA
AC198357.3_FG002	Refgen1	7	+	74390557	74391568	531	0	0	0	0	NA	NA	NA	NA	NA
AC198361.3_FG004	Refgen1	1	-	232679235	232680720	1332	365	353	41.071	40.391	0	1	1	no	hypothetical protein LOC100382683
AC198366.3_FG004	Refgen1	10	+	1373548	1375068	1521	0	0	0	0	NA	NA	NA	NA	NA
AC198379.3_FG006	Refgen1	7	-	98485433	98488299	534	0	0	0	0	NA	NA	NA	NA	NA
AC198380.3_FG001	Refgen1	7	+	96436125	96437582	957	0	0	0	0	NA	NA	NA	NA	NA
AC198393.3_FG001	Refgen1	7	+	60741301	60741924	624	0	0	0	0	NA	NA	NA	NA	NA
AC198403.3_FG001	Refgen1	4	-	10874957	10875595	639	4	8	0.938	1.908	NA	NA	NA	NA	CBF-like protein
AC198403.3_FG002	Refgen1	4	-	10919973	10923225	804	0	0	0	0	NA	NA	NA	NA	NA
AC198494.3_FG002	Refgen1	8	+	88836603	88837693	969	0	0	0	0	NA	NA	NA	NA	NA
AC198506.3_FG001	Refgen1	10	-	124073107	124074243	1137	0	0	0	0	NA	NA	NA	NA	NA
AC198515.3_FG011	Refgen1	10	-	139899935	139902611	2214	0	0	0	0	NA	NA	NA	NA	NA
AC198518.3_FG002	Refgen1	3	+	87753850	87754428	579	0	0	0	0	NA	NA	NA	NA	SAM domain family protein
AC198518.3_FG003	Refgen1	3	-	87832464	87836439	1050	98	84	13.989	12.193	-0.17	0.416132	0.556582	no	hypothetical protein LOC100276166
AC198518.3_FG004	Refgen1	3	-	87842913	87843503	591	38	18	9.637	4.642	-0.99	0.0110285	0.0315107	no	NA
AC198518.3_FG005	Refgen1	3	+	87821662	87823007	915	0	0	0	0	NA	NA	NA	NA	NA
AC198597.4_FG001	Refgen1	7	+	131032427	131033038	612	0	0	0	0	NA	NA	NA	NA	NA
AC198603.3_FG008	Refgen1	7	-	151810614	151811615	378	6	1	2.379	0.403	NA	NA	NA	NA	NA
AC198608.3_FG003	Refgen1	10	-	106668748	106671534	957	67	65	10.493	10.352	0	1	1	no	NA
AC198700.2_FG004	Refgen1	2	-	217601634	217602521	888	0	0	0	0	NA	NA	NA	NA	NA
AC198721.3_FG002	Refgen1	10	-	12435892	12438222	1854	0	0	0	0	NA	NA	NA	NA	NA
AC198725.4_FG004	Refgen1	3	+	215732452	215733732	1281	25	10	2.925	1.19	NA	NA	NA	NA	ovate protein
AC198725.4_FG007	Refgen1	3	-	215654420	215667443	3156	34	50	1.615	2.415	0.59	0.0635571	0.131566	no	Putative uncharacterized protein
AC198725.4_FG009	Refgen1	3	-	215635869	215638208	1059	13	3	1.84	0.432	NA	NA	NA	NA	WRKY11 - superfamily of TFs having WRKY and zinc finger domains (LOC100281232), mRNA
AC198743.3_FG008	Refgen1	4	-	25490417	25494246	1215	0	0	0	0	NA	NA	NA	NA	NA
AC198752.4_FG003	Refgen1	4	+	111950245	111957809	1509	6	9	0.596	0.909	NA	NA	NA	NA	NA
AC198752.4_FG004	Refgen1	4	+	111910912	111911780	420	0	0	0	0	NA	NA	NA	NA	NA
AC198787.3_FG001	Refgen1	10	+	85680364	85680786	423	0	0	0	0	NA	NA	NA	NA	NA
AC198787.3_FG004	Refgen1	10	+	85732986	85733408	423	0	0	0	0	NA	NA	NA	NA	NA
AC198923.4_FG002	Refgen1	8	-	158109197	158109661	465	3	8	0.967	2.622	NA	NA	NA	NA	Putative uncharacterized protein
AC198937.4_FG003	Refgen1	4	-	90926310	90928489	855	61	53	10.693	9.448	-0.15	0.575592	0.700995	no	NA
AC198937.4_FG004	Refgen1	4	-	90885558	90887255	360	136	119	56.621	50.381	-0.14	0.452403	0.591672	no	NA
AC198937.4_FG005	Refgen1	4	+	90882483	90883873	1146	0	0	0	0	NA	NA	NA	NA	NA
AC198937.4_FG006	Refgen1	4	+	90818007	90818591	585	136	189	34.844	49.241	0.52	0.00126863	0.00508364	no	NA
AC198940.4_FG008	Refgen1	2	+	215794128	215795620	774	0	0	0	0	NA	NA	NA	NA	NA
AC198979.4_FG009	Refgen1	1	+	10962245	10962637	393	0	0	0	0	NA	NA	NA	NA	NA
AC198993.3_FG004	Refgen1	4	-	92603172	92605551	879	0	0	0	0	NA	NA	NA	NA	NA
AC199039.3_FG003	Refgen1	8	+	134138835	134139806	972	0	0	0	0	NA	NA	NA	NA	hypothetical protein LOC100278491
AC199054.3_FG004	Refgen1	0	-	4015070	4018306	612	82	87	20.082	21.666	0.13	0.590388	0.71356	no	NA
AC199067.2_FG004	Refgen1	3	-	174701395	174702030	636	18	7	4.242	1.677	NA	NA	NA	NA	hypothetical protein LOC100276582
AC199068.2_FG017	Refgen1	2	+	232534797	232535570	774	22	11	4.26	2.166	NA	NA	NA	NA	hypothetical protein LOC100272760
AC199173.3_FG006	Refgen1	5	-	45589714	45591514	1041	267	279	38.442	40.848	0.11	0.391987	0.532736	no	NA
AC199175.2_FG006	Refgen1	1	-	242426160	242427014	288	0	0	0	0	NA	NA	NA	NA	NA
AC199193.3_FG003	Refgen1	7	-	60230788	60235458	1218	221	282	27.195	35.288	0.4	0.00207386	0.00776176	no	NA
AC199204.3_FG002	Refgen1	8	-	36203293	36204162	711	0	0	0	0	NA	NA	NA	NA	NA
AC199204.3_FG005	Refgen1	8	-	36137457	36140798	498	0	2	0	0.612	NA	NA	NA	NA	NA
AC199315.4_FG001	Refgen1	8	+	136909027	136909272	246	57	35	34.728	21.685	-0.64	0.0367108	0.0841359	no	Protein transport protein Sec61 beta subunitPutative uncharacterized protein ;
AC199343.3_FG013	Refgen1	2	-	6187181	6188455	1275	0	0	0	0	NA	NA	NA	NA	hypothetical protein LOC100274193
AC199349.2_FG007	Refgen1	10	-	128929671	128930655	540	0	0	0	0	NA	NA	NA	NA	NA
AC199363.4_FG003	Refgen1	8	+	83751062	83754749	942	16	42	2.546	6.795	1.39	0.00051928	0.00236339	no	NA
AC199364.3_FG001	Refgen1	8	+	68472264	68476611	1602	174	233	16.279	22.167	0.47	0.00124609	0.0050089	no	NA
AC199370.4_FG006	Refgen1	10	-	136373507	136373953	447	0	0	0	0	NA	NA	NA	NA	NA
AC199371.3_FG001	Refgen1	8	-	87326058	87329176	783	140	129	26.798	25.11	-0.07	0.71462	0.813661	no	NA
AC199439.4_FG005	Refgen1	8	-	144261632	144267846	2040	0	0	0	0	NA	NA	NA	NA	NA
AC199481.3_FG001	Refgen1	4	-	48248408	48250325	1395	0	0	0	0	NA	NA	NA	NA	NA
AC199517.4_FG001	Refgen1	3	+	50610178	50610918	741	0	0	0	0	NA	NA	NA	NA	NA
AC199517.4_FG006	Refgen1	3	+	50637910	50638650	741	0	0	0	0	NA	NA	NA	NA	NA
AC199526.5_FG002	Refgen1	3	+	58615537	58616721	1185	2521	1621	318.857	208.489	-0.59	1.40176e-38	1.17818e-36	no	hypothetical protein LOC100194360
AC199526.5_FG003	Refgen1	3	-	58661966	58670741	1428	271	307	28.443	32.766	0.23	0.0611694	0.127682	no	CRS2-associated factor 2, chloroplastic Precursor (Chloroplastic group IIA intron splicing facilitator CRS2-associated factor 2)
AC199526.5_FG004	Refgen1	3	+	58545093	58545926	834	134	100	24.081	18.275	-0.37	0.0499325	0.108379	no	NA
AC199539.3_FG006	Refgen1	9	+	110518755	110540743	3540	144	182	6.097	7.836	0.38	0.0171674	0.0452049	no	NA
AC199541.4_FG001	Refgen1	1	+	77205224	77206779	1398	153	99	16.403	10.793	-0.58	0.00196196	0.00740593	no	LOC100281067
AC199541.4_FG002	Refgen1	1	+	77254827	77256382	1398	0	0	0	0	NA	NA	NA	NA	NA
AC199541.4_FG004	Refgen1	1	-	77126515	77128070	1398	1	9	0.107	0.981	NA	NA	NA	NA	NA
AC199541.4_FG007	Refgen1	1	-	77173042	77174958	1386	20	17	2.163	1.869	NA	NA	NA	NA	hypothetical protein LOC100383146
AC199543.4_FG004	Refgen1	9	+	42105052	42106598	1206	0	0	0	0	NA	NA	NA	NA	NA
AC199571.3_FG003	Refgen1	10	-	93150912	93152540	1143	0	0	0	0	NA	NA	NA	NA	NA
AC199571.3_FG004	Refgen1	10	+	93149045	93150629	702	21	12	4.484	2.605	NA	NA	NA	NA	NA
AC199577.4_FG004	Refgen1	5	-	81153759	81154346	333	0	0	0	0	NA	NA	NA	NA	NA
AC199624.4_FG007	Refgen1	7	-	2557351	2559903	954	4	0	0.628	0	NA	NA	NA	NA	NA
AC199632.4_FG007	Refgen1	8	+	153409243	153410824	1545	1	0	0.097	0	NA	NA	NA	NA	NA
AC199633.4_FG001	Refgen1	8	-	148811719	148818891	3324	33	34	1.488	1.559	0.09	0.808262	0.883416	no	NA
AC199703.3_FG001	Refgen1	10	+	34507767	34509512	759	8	1	1.58	0.201	NA	NA	NA	NA	NA
AC199705.3_FG006	Refgen1	10	+	129553417	129554808	720	0	0	0	0	NA	NA	NA	NA	NA
AC199705.3_FG008	Refgen1	10	+	129579462	129580538	474	74	77	23.399	24.759	0.1	0.684439	0.789675	no	NA
AC199768.4_FG006	Refgen1	2	+	220393589	220397375	1377	178	249	19.374	27.56	0.53	0.000186727	0.000970843	no	NA
AC199782.5_FG001	Refgen1	2	-	191470211	191474175	1092	130	121	17.843	16.888	-0.06	0.800711	0.877634	no	hypothetical protein LOC100193266
AC199782.5_FG002	Refgen1	2	-	191411527	191414741	1413	78	112	8.274	12.081	0.56	0.00722834	0.0222449	no	hypothetical protein LOC100272824
AC199782.5_FG003	Refgen1	2	+	191416466	191417458	993	0	0	0	0	NA	NA	NA	NA	hypothetical protein LOC100192578
AC199810.3_FG003	Refgen1	8	+	104681284	104682000	717	0	0	0	0	NA	NA	NA	NA	NA
AC199820.4_FG006	Refgen1	2	-	206977377	206978048	462	0	0	0	0	NA	NA	NA	NA	NA
AC199826.4_FG003	Refgen1	1	+	214933673	214934574	816	4	0	0.735	0	NA	NA	NA	NA	NA
AC199843.4_FG007	Refgen1	8	-	14050892	14053534	2265	2	1	0.132	0.067	NA	NA	NA	NA	NA
AC199858.4_FG002	Refgen1	10	-	139146847	139149943	1572	55	57	5.244	5.526	0.1	0.776956	0.860221	no	NA
AC199873.4_FG004	Refgen1	3	-	13619879	13624877	1452	26	28	2.684	2.939	0.15	0.785792	0.866849	no	NA
AC199878.4_FG001	Refgen1	7	+	157508285	157513511	1437	9	10	0.939	1.061	NA	NA	NA	NA	NA
AC199908.4_FG002	Refgen1	1	+	177010159	177013061	1011	0	0	0	0	NA	NA	NA	NA	NA
AC199911.5_FG001	Refgen1	10	-	72736391	72737191	801	2	0	0.374	0	NA	NA	NA	NA	vacuolar ATP synthase subunit D 1
AC199922.3_FG003	Refgen1	1	+	59146485	59152222	1875	89	166	7.114	13.494	0.94	3.28335e-07	3.2865e-06	yes	NA
AC199961.4_FG001	Refgen1	10	+	146316023	146322712	1998	4	4	0.3	0.305	NA	NA	NA	NA	NA
AC199961.4_FG004	Refgen1	10	+	146296912	146302764	2550	6	1	0.353	0.06	NA	NA	NA	NA	NA
AC200038.4_FG011	Refgen1	1	-	21592440	21593592	1020	0	0	0	0	NA	NA	NA	NA	NA
AC200045.3_FG006	Refgen1	10	-	105962878	105965361	2484	0	0	0	0	NA	NA	NA	NA	NA
AC200057.4_FG007	Refgen1	7	+	135109783	135114529	1140	45	24	5.916	3.209	-0.83	0.0214821	0.0543913	no	NA
AC200067.4_FG002	Refgen1	4	-	119986262	119986705	270	0	0	0	0	NA	NA	NA	NA	NA
AC200069.4_FG002	Refgen1	10	+	115745183	115745777	240	0	0	0	0	NA	NA	NA	NA	NA
AC200099.4_FG006	Refgen1	8	+	26501615	26502712	1098	8	0	1.092	0	NA	NA	NA	NA	NA
AC200109.4_FG002	Refgen1	8	-	78868312	78870246	693	45	16	9.732	3.519	-1.39	0.000294436	0.00144784	no	NA
AC200117.3_FG004	Refgen1	4	+	246480241	246481182	759	0	0	0	0	NA	NA	NA	NA	NA
AC200138.3_FG003	Refgen1	1	-	149159880	149161928	390	0	0	0	0	NA	NA	NA	NA	NA
AC200143.3_FG003	Refgen1	7	+	153490340	153491133	333	0	0	0	0	NA	NA	NA	NA	NA
AC200184.3_FG003	Refgen1	10	-	12812797	12814237	1092	33	54	4.529	7.537	0.74	0.0180446	0.0470554	no	NA
AC200215.3_FG002	Refgen1	5	+	157394435	157396991	1152	0	0	0	0	NA	NA	NA	NA	NA
AC200225.5_FG001	Refgen1	10	+	36924762	36925278	240	0	0	0	0	NA	NA	NA	NA	NA
AC200238.4_FG001	Refgen1	4	-	66356928	66358260	666	229	186	51.535	42.566	-0.25	0.0772573	0.153889	no	NA
AC200287.4_FG006	Refgen1	6	-	84910028	84914891	1134	4	2	0.529	0.269	NA	NA	NA	NA	NA
AC200298.4_FG001	Refgen1	3	+	55102932	55103968	717	2	2	0.418	0.425	NA	NA	NA	NA	NA
AC200627.3_FG005	Refgen1	1	-	273844688	273845419	732	0	0	0	0	NA	NA	NA	NA	NA
AC200753.3_FG003	Refgen1	7	-	7346711	7349923	3213	59	38	2.752	1.803	-0.57	0.0535408	0.114737	no	NA
AC200754.4_FG004	Refgen1	1	+	219715807	219717507	1701	14	10	1.234	0.896	NA	NA	NA	NA	NA
AC200852.4_FG008	Refgen1	8	+	113074416	113082564	1038	84	99	12.129	14.536	0.28	0.18429	0.302555	no	NA
AC200874.4_FG003	Refgen1	7	-	130806347	130807982	708	26	45	5.504	9.687	0.82	0.0175608	0.0460234	no	NA
AC200881.4_FG004	Refgen1	1	+	216931711	216934190	1314	164	217	18.706	25.17	0.45	0.00247775	0.00901717	no	NA
AC200881.4_FG007	Refgen1	1	-	217057254	217058514	924	0	0	0	0	NA	NA	NA	NA	NA
AC200904.3_FG003	Refgen1	3	-	32839895	32843699	1518	0	0	0	0	NA	NA	NA	NA	NA
AC201740.3_FG003	Refgen1	9	-	115357373	115357768	396	0	0	0	0	NA	NA	NA	NA	NA
AC201757.3_FG002	Refgen1	3	+	56477259	56478157	342	52	35	22.789	15.598	-0.51	0.107586	0.199257	no	NA
AC201769.3_FG002	Refgen1	6	-	38315478	38315789	312	34	41	16.333	20.029	0.31	0.357472	0.49809	no	NA
AC201771.3_FG005	Refgen1	5	+	21273491	21276206	1509	43	25	4.271	2.525	-0.71	0.0515282	0.111007	no	NA
AC201815.4_FG001	Refgen1	5	-	46976116	46978008	1893	49	59	3.88	4.75	0.31	0.289838	0.425324	no	NA
AC201832.3_FG006	Refgen1	8	-	118654045	118656137	576	0	0	0	0	NA	NA	NA	NA	NA
AC201909.4_FG004	Refgen1	6	-	111543721	111544611	891	18	12	3.028	2.053	NA	NA	NA	NA	NA
AC201978.4_FG005	Refgen1	4	-	189285532	189294841	1614	1	2	0.093	0.189	NA	NA	NA	NA	NA
AC202035.4_FG003	Refgen1	1	-	272112669	272114096	1428	569	414	59.721	44.187	-0.41	1.03757e-05	7.49975e-05	no	NA
AC202069.3_FG002	Refgen1	9	+	127853643	127854623	909	0	0	0	0	NA	NA	NA	NA	NA
AC202073.4_FG001	Refgen1	2	-	46951403	46954584	1137	14	24	1.845	3.217	NA	NA	NA	NA	NA
AC202076.3_FG009	Refgen1	5	+	213296860	213297162	303	0	0	0	0	NA	NA	NA	NA	NA
AC202076.3_FG011	Refgen1	5	+	213289132	213290640	1023	306	337	44.832	50.208	0.19	0.105832	0.196974	no	NA
AC202091.4_FG003	Refgen1	10	+	25674905	25675827	834	0	0	0	0	NA	NA	NA	NA	NA
AC202101.3_FG002	Refgen1	1	+	43035717	43036655	939	0	0	0	0	NA	NA	NA	NA	NA
AC202110.3_FG004	Refgen1	7	+	66984072	66986109	612	4	1	0.98	0.249	NA	NA	NA	NA	NA
AC202122.2_FG001	Refgen1	9	+	24227269	24227652	213	0	0	0	0	NA	NA	NA	NA	NA
AC202129.3_FG001	Refgen1	7	-	17763541	17763900	360	3	7	1.249	2.964	NA	NA	NA	NA	NA
AC202139.3_FG007	Refgen1	3	+	41038298	41039236	939	0	0	0	0	NA	NA	NA	NA	NA
AC202139.3_FG008	Refgen1	3	+	41039907	41040740	834	0	0	0	0	NA	NA	NA	NA	NA
AC202179.3_FG004	Refgen1	6	+	82475827	82477881	1323	0	0	0	0	NA	NA	NA	NA	NA
AC202179.3_FG005	Refgen1	6	+	82471712	82474040	1794	0	0	0	0	NA	NA	NA	NA	NA
AC202185.4_FG004	Refgen1	1	-	121016625	121017723	570	171	74	44.964	19.787	-1.15	1.89333e-09	2.68145e-08	yes	hsp20/alpha crystallin family protein
AC202391.4_FG002	Refgen1	7	+	15336364	15338231	1671	0	0	0	0	NA	NA	NA	NA	NA
AC202396.4_FG010	Refgen1	5	+	23629977	23630589	582	0	0	0	0	NA	NA	NA	NA	NA
AC202435.3_FG001	Refgen1	2	-	72116679	72118075	1161	5	1	0.645	0.131	NA	NA	NA	NA	NA
AC202439.3_FG001	Refgen1	6	+	113867154	113867720	567	11	6	2.908	1.613	NA	NA	NA	NA	NA
AC202439.3_FG003	Refgen1	6	-	113737516	113742379	816	233	225	42.796	42.025	0	1	1	no	NA
AC202439.3_FG004	Refgen1	6	-	113746878	113750819	1149	0	4	0	0.531	NA	NA	NA	NA	NA
AC202439.3_FG005	Refgen1	6	-	113706612	113707670	1059	799	546	113.082	78.581	-0.5	2.72833e-10	4.3669e-09	no	NA
AC202439.3_FG006	Refgen1	6	+	113796390	113801956	2130	12	24	0.844	1.717	NA	NA	NA	NA	NA
AC202567.4_FG004	Refgen1	5	+	154392750	154397883	1275	1	4	0.118	0.478	NA	NA	NA	NA	NA
AC202707.3_FG001	Refgen1	4	+	49712104	49714135	1569	1124	826	107.37	80.237	-0.4	1.60729e-09	2.29577e-08	no	NA
AC202707.3_FG002	Refgen1	4	+	49734038	49737935	1398	0	1	0	0.109	NA	NA	NA	NA	NA
AC202855.3_FG004	Refgen1	4	+	201354652	201355320	669	0	1	0	0.228	NA	NA	NA	NA	NA
AC202864.3_FG002	Refgen1	6	-	160671441	160672934	1149	8	6	1.044	0.796	NA	NA	NA	NA	hypothetical protein LOC100279625
AC202867.3_FG008	Refgen1	3	+	128627276	128627815	405	0	0	0	0	NA	NA	NA	NA	NA
AC202902.3_FG001	Refgen1	3	+	186396446	186398284	858	15	19	2.62	3.375	NA	NA	NA	NA	NA
AC202915.3_FG002	Refgen1	8	+	127405730	127406891	1047	104	72	14.888	10.481	-0.48	0.0288574	0.0690514	no	Putative uncharacterized protein
AC202921.3_FG004	Refgen1	3	+	176530911	176531381	471	0	0	0	0	NA	NA	NA	NA	NA
AC202930.4_FG003	Refgen1	9	-	90870568	90872215	498	133	173	40.028	52.946	0.42	0.0117569	0.0331835	no	NA
AC202950.3_FG008	Refgen1	5	+	1445716	1447059	1344	0	0	0	0	NA	NA	NA	NA	NA
AC202974.3_FG004	Refgen1	5	-	1580272	1580925	654	6	4	1.375	0.932	NA	NA	NA	NA	NA
AC202982.2_FG004	Refgen1	6	-	28930184	28930603	420	0	0	0	0	NA	NA	NA	NA	NA
AC202984.3_FG004	Refgen1	1	-	293033228	293034673	396	14	7	5.299	2.694	NA	NA	NA	NA	NA
AC203006.3_FG005	Refgen1	5	+	203200244	203201125	882	0	0	0	0	NA	NA	NA	NA	NA
AC203009.3_FG005	Refgen1	1	-	256635437	256636612	1071	0	0	0	0	NA	NA	NA	NA	NA
AC203031.3_FG002	Refgen1	7	-	116925862	116926401	540	26	21	7.216	5.927	-0.25	0.562548	0.68957	no	NA
AC203048.3_FG001	Refgen1	5	-	21112969	21114167	246	1	4	0.609	2.478	NA	NA	NA	NA	NA
AC203148.3_FG005	Refgen1	8	-	112562103	112564059	582	0	0	0	0	NA	NA	NA	NA	NA
AC203159.3_FG010	Refgen1	7	+	7410543	7411191	558	0	0	0	0	NA	NA	NA	NA	NA
AC203160.3_FG002	Refgen1	9	-	111228122	111237768	624	27	36	6.485	8.793	0.45	0.210627	0.334499	no	NA
AC203173.3_FG001	Refgen1	8	+	173876979	173878137	984	2	2	0.305	0.31	NA	NA	NA	NA	NA
AC203173.3_FG002	Refgen1	8	-	173915495	173919108	1812	0	0	0	0	NA	NA	NA	NA	NA
AC203173.3_FG004	Refgen1	8	-	173945996	173949357	2532	4421	5128	261.697	308.677	0.26	9.43439e-19	3.2008e-17	no	hypothetical protein LOC100272648
AC203220.3_FG004	Refgen1	7	-	71401132	71402735	870	280	144	48.237	25.227	-0.91	2.78632e-10	4.45546e-09	yes	NA
AC203253.4_FG001	Refgen1	3	-	147774115	147774690	576	0	0	0	0	NA	NA	NA	NA	NA
AC203257.2_FG003	Refgen1	2	+	138926447	138928099	678	0	0	0	0	NA	NA	NA	NA	NA
AC203265.3_FG002	Refgen1	6	+	61139702	61143218	1557	0	0	0	0	NA	NA	NA	NA	NA
AC203278.4_FG001	Refgen1	5	+	69265923	69267866	765	193	333	37.813	66.344	0.83	8.32236e-11	1.43653e-09	yes	NA
AC203280.3_FG001	Refgen1	1	+	118833272	118834502	693	0	0	0	0	NA	NA	NA	NA	NA
AC203287.3_FG004	Refgen1	1	-	252094997	252100196	1350	37	35	4.108	3.951	-0.03	1	1	no	NA
AC203294.3_FG001	Refgen1	8	-	169987274	169989516	1395	0	0	0	0	NA	NA	NA	NA	NA
AC203294.3_FG012	Refgen1	8	+	169931945	169932478	534	0	0	0	0	NA	NA	NA	NA	VQ motif family protein
AC203323.2_FG001	Refgen1	10	+	96133013	96133714	702	0	0	0	0	NA	NA	NA	NA	NA
AC203326.3_FG002	Refgen1	3	-	76193479	76195298	1545	2	5	0.194	0.493	NA	NA	NA	NA	NA
AC203369.3_FG004	Refgen1	3	+	195075093	195080198	1461	25	31	2.565	3.234	0.35	0.422898	0.563617	no	NA
AC203381.3_FG006	Refgen1	8	+	172793301	172793543	243	1	0	0.617	0	NA	NA	NA	NA	NA
AC203392.3_FG004	Refgen1	8	-	165800798	165803546	1308	153	119	17.532	13.866	-0.31	0.0785619	0.156023	no	NA
AC203408.4_FG003	Refgen1	6	+	13762372	13763878	1197	0	0	0	0	NA	NA	NA	NA	NA
AC203423.3_FG009	Refgen1	9	+	47718046	47719350	1305	0	0	0	0	NA	NA	NA	NA	NA
AC203535.4_FG001	Refgen1	3	+	156245663	156254493	2778	361	442	19.477	24.25	0.34	0.000901527	0.00377351	no	myb2
AC203535.4_FG004	Refgen1	3	-	156322592	156324529	831	1450	1717	261.522	314.912	0.29	1.54262e-08	1.93562e-07	no	rieske domain containing protein
AC203535.4_FG006	Refgen1	3	-	156153105	156153932	549	2	1	0.546	0.278	NA	NA	NA	NA	NA
AC203535.4_FG007	Refgen1	3	+	156149389	156152428	1308	0	0	0	0	NA	NA	NA	NA	NA
AC203571.3_FG001	Refgen1	9	-	110092970	110093872	903	7	7	1.162	1.181	NA	NA	NA	NA	hypothetical protein LOC100275376
AC203745.3_FG005	Refgen1	6	-	62784873	62786599	780	28	19	5.38	3.713	-0.49	0.245935	0.375069	no	NA
AC203748.3_FG002	Refgen1	9	+	96125022	96126572	1551	1	0	0.097	0	NA	NA	NA	NA	NA
AC203753.4_FG006	Refgen1	7	+	38724910	38734310	1737	0	6	0	0.526	NA	NA	NA	NA	NA
AC203753.4_FG007	Refgen1	7	+	38708706	38709065	360	0	0	0	0	NA	NA	NA	NA	NA
AC203754.4_FG007	Refgen1	6	-	151303407	151304174	768	0	0	0	0	NA	NA	NA	NA	NA
AC203761.3_FG002	Refgen1	9	+	35413963	35423598	2001	254	309	19.025	23.536	0.33	0.00696126	0.0215499	no	NA
AC203768.3_FG005	Refgen1	6	-	35334364	35341906	1008	0	0	0	0	NA	NA	NA	NA	NA
AC203811.3_FG008	Refgen1	10	+	140412367	140417716	1350	46	53	5.107	5.984	0.25	0.421769	0.562651	no	NA
AC203812.3_FG004	Refgen1	9	+	122422418	122424714	762	48	45	9.441	9.001	-0.04	0.917602	0.95846	no	NA
AC203841.3_FG001	Refgen1	10	+	123837462	123842209	840	36	60	6.423	10.887	0.77	0.0104166	0.030086	no	NA
AC203841.3_FG002	Refgen1	10	+	123842926	123845751	2826	222	245	11.774	13.213	0.19	0.164984	0.277981	no	NA
AC203841.3_FG009	Refgen1	10	+	123875823	123882468	1191	103	90	12.962	11.517	-0.15	0.517173	0.649856	no	CAB2
AC203843.4_FG004	Refgen1	3	+	76209240	76210004	765	108	127	21.159	25.302	0.28	0.151058	0.259431	no	NA
AC203847.3_FG004	Refgen1	8	+	131714047	131716380	840	0	0	0	0	NA	NA	NA	NA	NA
AC203847.3_FG009	Refgen1	8	+	131653378	131655108	1098	0	0	0	0	NA	NA	NA	NA	NA
AC203862.4_FG001	Refgen1	8	-	77468477	77469973	1497	80	85	8.01	8.654	0.13	0.58596	0.709275	no	hypothetical protein LOC100192667
AC203862.4_FG002	Refgen1	8	-	77470855	77473905	2205	61	54	4.146	3.733	-0.13	0.642348	0.75624	no	NA
AC203862.4_FG003	Refgen1	8	+	77474704	77478906	1158	445	597	57.596	78.575	0.47	1.82497e-07	1.91376e-06	no	NA
AC203862.4_FG004	Refgen1	8	-	77480176	77481740	900	59	52	9.825	8.806	-0.13	0.636294	0.751918	no	NA
AC203862.4_FG005	Refgen1	8	-	77484930	77488357	1257	191	285	22.774	34.556	0.62	3.37727e-06	2.74215e-05	no	NA
AC203865.3_FG001	Refgen1	3	+	116197093	116200366	1185	16	12	2.024	1.543	NA	NA	NA	NA	hypothetical protein LOC100217281
AC203865.3_FG002	Refgen1	3	+	116264078	116267930	1551	238	338	22.999	33.214	0.55	5.27051e-06	4.0945e-05	no	NA
AC203900.3_FG006	Refgen1	3	-	196561883	196563127	1245	0	0	0	0	NA	NA	NA	NA	NA
AC203909.3_FG003	Refgen1	4	+	32083663	32085309	1647	3	3	0.273	0.278	NA	NA	NA	NA	hypothetical protein LOC100272856
AC203909.3_FG007	Refgen1	4	+	32005078	32006712	1635	0	0	0	0	NA	NA	NA	NA	NA
AC203909.3_FG010	Refgen1	4	-	32046000	32046344	345	0	0	0	0	NA	NA	NA	NA	hypothetical protein LOC100278797
AC203925.3_FG002	Refgen1	4	+	22560839	22561060	222	0	0	0	0	NA	NA	NA	NA	NA
AC203955.3_FG005	Refgen1	8	+	103242152	103242973	822	0	0	0	0	NA	NA	NA	NA	NA
AC203956.3_FG004	Refgen1	9	-	109967978	109973610	1473	0	0	0	0	NA	NA	NA	NA	NA
AC203957.3_FG004	Refgen1	2	-	171584803	171585445	513	20	23	5.843	6.833	0.24	0.64809	0.760898	no	hypothetical protein LOC100381716
AC203966.5_FG002	Refgen1	1	-	298523863	298527655	666	17	10	3.826	2.288	NA	NA	NA	NA	NA
AC203966.5_FG003	Refgen1	1	-	298440837	298441661	825	13	9	2.362	1.663	NA	NA	NA	NA	receptor protein kinase-like protein
AC203966.5_FG004	Refgen1	1	+	298483426	298486995	771	1926	1486	374.407	293.754	-0.33	4.63876e-11	8.26282e-10	no	NA
AC203966.5_FG005	Refgen1	1	-	298412941	298414056	1116	69	59	9.267	8.058	-0.18	0.536231	0.667287	no	LOC778427
AC203966.5_FG006	Refgen1	1	-	298426952	298430335	747	0	0	0	0	NA	NA	NA	NA	NA
AC203971.3_FG004	Refgen1	7	+	65328636	65339323	2127	78	82	5.496	5.876	0.12	0.635485	0.751228	no	NA
AC203972.3_FG001	Refgen1	10	+	27642925	27645636	2712	77	113	4.255	6.351	0.59	0.0046217	0.0152153	no	NA
AC203985.4_FG001	Refgen1	10	-	79077013	79078607	1506	8	6	0.796	0.607	NA	NA	NA	NA	glycerol 3-phosphate permease
AC203985.4_FG005	Refgen1	10	-	79168660	79169100	441	49	31	16.653	10.714	-0.6	0.0731087	0.147203	no	prefoldin subunit 2
AC203989.4_FG001	Refgen1	1	-	176619399	176620878	930	45	28	7.252	4.589	-0.62	0.0784751	0.155869	no	cupin, RmlC-type
AC204007.3_FG008	Refgen1	8	-	163086435	163086920	486	0	0	0	0	NA	NA	NA	NA	hypothetical protein LOC100192825
AC204048.3_FG002	Refgen1	5	-	50735356	50735664	309	0	0	0	0	NA	NA	NA	NA	NA
AC204050.4_FG006	Refgen1	6	-	162244026	162245435	1410	1	0	0.106	0	NA	NA	NA	NA	NA
AC204053.2_FG001	Refgen1	4	-	12614019	12615302	1188	3	0	0.378	0	NA	NA	NA	NA	NA
AC204212.4_FG001	Refgen1	5	+	200266583	200266867	285	90	106	47.33	56.687	0.28	0.175193	0.290477	no	SANT/MYB protein
AC204231.3_FG010	Refgen1	4	-	239378275	239379915	1380	0	0	0	0	NA	NA	NA	NA	NA
AC204254.3_FG001	Refgen1	8	+	8847185	8847631	447	0	0	0	0	NA	NA	NA	NA	hypothetical protein LOC100276643
AC204292.4_FG002	Refgen1	6	-	137238490	137240487	1998	40	38	3.001	2.899	-0.02	1	1	no	NA
AC204292.4_FG003	Refgen1	6	-	137241083	137241721	639	9	4	2.111	0.954	NA	NA	NA	NA	NA
AC204292.4_FG005	Refgen1	6	+	137196929	137197333	405	0	0	0	0	NA	NA	NA	NA	NA
AC204292.4_FG006	Refgen1	6	+	137252922	137255198	2277	0	0	0	0	NA	NA	NA	NA	hypothetical protein LOC100191963
AC204298.3_FG006	Refgen1	5	-	134556855	134559197	2007	6	20	0.448	1.519	NA	NA	NA	NA	NA
AC204300.3_FG003	Refgen1	3	-	30135355	30137691	1611	0	1	0	0.095	NA	NA	NA	NA	NA
AC204306.3_FG007	Refgen1	1	+	56855966	56856460	495	0	0	0	0	NA	NA	NA	NA	NA
AC204311.4_FG004	Refgen1	2	+	120137579	120140397	549	2	7	0.546	1.943	NA	NA	NA	NA	NA
AC204322.2_FG002	Refgen1	1	-	30150296	30152289	456	0	0	0	0	NA	NA	NA	NA	NA
AC204352.3_FG011	Refgen1	6	+	156966683	156967495	813	71	40	13.089	7.499	-0.77	0.00580026	0.0184124	no	NA
AC204352.3_FG012	Refgen1	6	-	156977854	156979243	1086	0	0	0	0	NA	NA	NA	NA	NA
AC204359.3_FG005	Refgen1	8	+	170177614	170178696	1083	43	34	5.951	4.785	-0.28	0.425384	0.566118	no	hypothetical protein LOC100192498
AC204381.3_FG001	Refgen1	3	-	190617222	190621375	2823	0	0	0	0	NA	NA	NA	NA	NA
AC204384.3_FG003	Refgen1	8	-	100221165	100223240	693	0	0	0	0	NA	NA	NA	NA	NA
AC204384.3_FG004	Refgen1	8	+	100223672	100225114	1335	25	13	2.807	1.484	NA	NA	NA	NA	NA
AC204418.3_FG006	Refgen1	6	+	118410760	118414621	2652	415	486	23.454	27.931	0.27	0.0045972	0.0151513	no	NA
AC204437.3_FG004	Refgen1	10	+	144758672	144759385	714	2	3	0.42	0.64	NA	NA	NA	NA	NA
AC204472.3_FG002	Refgen1	9	+	37296238	37297241	597	1	3	0.251	0.766	NA	NA	NA	NA	NA
AC204476.3_FG004	Refgen1	5	-	185714638	185716192	1080	0	0	0	0	NA	NA	NA	NA	NA
AC204502.4_FG006	Refgen1	8	+	168989660	168990745	1086	30	36	4.14	5.052	0.3	0.391916	0.532736	no	NA
AC204515.4_FG004	Refgen1	3	-	186798956	186801922	1263	2	1	0.237	0.121	NA	NA	NA	NA	NA
AC204515.4_FG006	Refgen1	3	+	186788901	186790490	1512	9	6	0.892	0.605	NA	NA	NA	NA	Putative uncharacterized protein
AC204517.3_FG002	Refgen1	1	+	167483636	167485425	1095	155	173	21.216	24.08	0.2	0.204224	0.326938	no	NA
AC204530.4_FG002	Refgen1	1	+	61676696	61684522	1827	31	25	2.543	2.086	-0.25	0.507613	0.641749	no	hypothetical protein LOC100277863
AC204530.4_FG003	Refgen1	1	-	61685003	61686476	1098	0	0	0	0	NA	NA	NA	NA	Annexin-like protein RJ4
AC204530.4_FG005	Refgen1	1	+	61691125	61694813	642	42	54	9.805	12.82	0.4	0.184628	0.302873	no	NA
AC204530.4_FG006	Refgen1	1	+	61729941	61732143	1413	33	17	3.5	1.834	-0.87	0.0340036	0.0788827	no	NA
AC204539.4_FG001	Refgen1	2	+	186609114	186609691	417	8	9	2.875	3.289	NA	NA	NA	NA	NA
AC204539.4_FG002	Refgen1	2	+	186619907	186620562	501	48	27	14.36	8.214	-0.76	0.0275942	0.0666676	no	hypothetical protein LOC100275289
AC204539.4_FG003	Refgen1	2	+	186625645	186628513	657	21	18	4.791	4.176	NA	NA	NA	NA	NA
AC204552.3_FG001	Refgen1	1	-	91526229	91527975	651	0	0	0	0	NA	NA	NA	NA	NA
AC204569.3_FG002	Refgen1	2	-	107378770	107379807	1038	0	0	0	0	NA	NA	NA	NA	NA
AC204573.3_FG015	Refgen1	6	+	108427481	108429450	1734	0	0	0	0	NA	NA	NA	NA	NA
AC204591.3_FG002	Refgen1	1	+	248695767	248696178	282	0	0	0	0	NA	NA	NA	NA	NA
AC204596.3_FG005	Refgen1	9	-	14471804	14473068	609	11	17	2.707	4.255	NA	NA	NA	NA	NA
AC204604.3_FG008	Refgen1	5	+	199613224	199614120	507	35	29	10.347	8.718	-0.22	0.617392	0.73603	no	LOC100284816 (pco101414), mRNA
AC204605.3_FG008	Refgen1	4	-	37026423	37027467	594	0	0	0	0	NA	NA	NA	NA	NA
AC204611.4_FG001	Refgen1	4	+	18083264	18085309	1113	4	4	0.539	0.548	NA	NA	NA	NA	hypothetical protein LOC100381730
AC204619.3_FG003	Refgen1	8	+	145553450	145553842	393	128	46	48.816	17.84	-1.41	1.13015e-09	1.66399e-08	yes	hypothetical protein LOC100277199
AC204621.4_FG006	Refgen1	4	+	3889573	3890550	885	0	0	0	0	NA	NA	NA	NA	NA
AC204641.5_FG001	Refgen1	7	-	57959783	57964535	1692	0	0	0	0	NA	NA	NA	NA	NA
AC204659.3_FG005	Refgen1	1	-	62322030	62323282	687	0	0	0	0	NA	NA	NA	NA	NA
AC204711.3_FG001	Refgen1	10	+	102360438	102363106	543	13	3	3.588	0.842	NA	NA	NA	NA	NA
AC204711.3_FG002	Refgen1	10	+	102238791	102243849	1728	52	20	4.51	1.764	-1.29	0.000335901	0.00162191	no	hydrolase, hydrolyzing O-glycosyl compounds
AC204711.3_FG003	Refgen1	10	-	102192122	102192579	255	0	0	0	0	NA	NA	NA	NA	senescence-associated protein DIN1
AC204712.3_FG002	Refgen1	3	-	198162288	198162916	339	9	10	3.979	4.496	NA	NA	NA	NA	NA
AC204756.4_FG003	Refgen1	6	+	129757181	129759865	1515	1	0	0.099	0	NA	NA	NA	NA	NA
AC204768.3_FG001	Refgen1	7	-	93460320	93461849	774	0	0	0	0	NA	NA	NA	NA	NA
AC204821.3_FG004	Refgen1	1	+	94570783	94571529	747	0	0	0	0	NA	NA	NA	NA	NA
AC204824.4_FG002	Refgen1	1	+	177856799	177858507	1632	0	0	0	0	NA	NA	NA	NA	NA
AC204827.3_FG003	Refgen1	9	+	111113062	111115032	1866	0	3	0	0.245	NA	NA	NA	NA	NA
AC204842.3_FG003	Refgen1	4	+	22486009	22487539	696	55	24	11.844	5.256	-1.12	0.000978127	0.00405055	no	NA
AC204857.3_FG001	Refgen1	5	-	65351651	65353840	1032	46	33	6.681	4.874	-0.42	0.215817	0.340639	no	NA
AC204868.3_FG004	Refgen1	4	+	185917632	185918929	678	1	0	0.221	0	NA	NA	NA	NA	NA
AC204887.4_FG004	Refgen1	1	+	387998	388676	234	1	10	0.641	6.513	NA	NA	NA	NA	NA
AC204893.3_FG001	Refgen1	8	-	10035546	10036291	360	0	0	0	0	NA	NA	NA	NA	NA
AC204921.4_FG011	Refgen1	6	+	145348001	145356300	1167	100	121	12.843	15.803	0.32	0.106287	0.197375	no	NA
AC204931.3_FG004	Refgen1	1	+	54441892	54443255	354	0	0	0	0	NA	NA	NA	NA	NA
AC205008.4_FG002	Refgen1	7	+	21621029	21624167	2652	30	7	1.695	0.402	NA	NA	NA	NA	NA
AC205012.3_FG002	Refgen1	8	-	76261814	76263549	1662	1	0	0.09	0	NA	NA	NA	NA	Putative uncharacterized protein
AC205024.3_FG001	Refgen1	6	-	140923989	140924339	351	149	64	63.624	27.79	-1.16	1.93549e-08	2.38037e-07	yes	NA
AC205024.3_FG002	Refgen1	6	-	140909897	140912034	588	9	7	2.294	1.814	NA	NA	NA	NA	NA
AC205057.3_FG002	Refgen1	4	-	92156269	92157495	1227	28	13	3.42	1.615	-1	0.0283779	0.0681478	no	hypothetical protein LOC100216973
AC205057.3_FG004	Refgen1	4	-	92162714	92163963	819	7	3	1.281	0.558	NA	NA	NA	NA	NA
AC205060.2_FG002	Refgen1	3	+	187328482	187329421	489	0	0	0	0	NA	NA	NA	NA	NA
AC205072.3_FG010	Refgen1	6	+	164678703	164680167	1110	181	271	24.44	37.211	0.63	4.70135e-06	3.69872e-05	no	NA
AC205100.3_FG001	Refgen1	1	-	35192911	35198202	951	0	0	0	0	NA	NA	NA	NA	NA
AC205122.4_FG003	Refgen1	7	+	2135550	2137803	654	891	634	204.193	147.751	-0.44	2.64877e-09	3.71361e-08	no	NA
AC205122.4_FG004	Refgen1	7	-	2138939	2143209	948	65	86	10.277	13.826	0.45	0.0610907	0.127545	no	NA
AC205122.4_FG005	Refgen1	7	+	2143876	2145294	1419	0	0	0	0	NA	NA	NA	NA	hypothetical protein LOC100277753
AC205122.4_FG006	Refgen1	7	-	2146517	2148784	2268	0	0	0	0	NA	NA	NA	NA	NA
AC205122.4_FG007	Refgen1	7	+	2152158	2154530	1434	0	0	0	0	NA	NA	NA	NA	NA
AC205122.4_FG008	Refgen1	7	+	2158693	2160120	1428	0	0	0	0	NA	NA	NA	NA	NA
AC205122.4_FG009	Refgen1	7	-	2161706	2163216	792	0	0	0	0	NA	NA	NA	NA	NA
AC205122.4_FG010	Refgen1	7	-	2178164	2210190	2481	11	14	0.665	0.86	NA	NA	NA	NA	NA
AC205142.3_FG001	Refgen1	1	-	14743110	14743934	633	35	22	8.287	5.297	-0.6	0.11389	0.20812	no	NA
AC205154.3_FG005	Refgen1	4	+	104110391	104111508	1029	16	5	2.33	0.741	NA	NA	NA	NA	NA
AC205175.3_FG001	Refgen1	1	-	99435085	99436851	1629	1	0	0.092	0	NA	NA	NA	NA	NA
AC205250.3_FG004	Refgen1	8	+	167834210	167834842	633	0	0	0	0	NA	NA	NA	NA	NA
AC205250.3_FG006	Refgen1	8	+	167849333	167849971	639	15	9	3.518	2.147	NA	NA	NA	NA	NA
AC205251.3_FG002	Refgen1	2	+	139446346	139446951	606	0	0	0	0	NA	NA	NA	NA	NA
AC205274.3_FG001	Refgen1	8	-	48775539	48776042	504	4	1	1.19	0.302	NA	NA	NA	NA	Pathogenesis-related protein PRMS Precursor
AC205314.3_FG010	Refgen1	7	-	164822014	164825827	729	43	44	8.841	9.199	0.08	0.830646	0.899714	no	NA
AC205320.3_FG004	Refgen1	7	+	5967530	5968154	579	6	4	1.553	1.053	NA	NA	NA	NA	NA
AC205326.3_FG002	Refgen1	8	+	167382497	167383474	978	15	15	2.299	2.338	NA	NA	NA	NA	NA
AC205345.3_FG002	Refgen1	6	+	88666554	88669717	1356	0	0	0	0	NA	NA	NA	NA	NA
AC205362.4_FG002	Refgen1	6	+	47273611	47275597	1455	53	17	5.46	1.781	-1.54	3.37475e-05	0.000215443	yes	AAP6
AC205376.4_FG003	Refgen1	4	-	86896778	86898051	510	58	59	17.045	17.632	0.07	0.853391	0.916575	no	NA
AC205405.3_FG001	Refgen1	2	+	156138225	156138647	423	0	0	0	0	NA	NA	NA	NA	NA
AC205413.4_FG001	Refgen1	10	-	86002567	86003589	1023	19	6	2.784	0.894	NA	NA	NA	NA	hypothetical protein LOC100273104
AC205413.4_FG002	Refgen1	10	-	85908473	85909186	714	0	2	0	0.427	NA	NA	NA	NA	NA
AC205413.4_FG003	Refgen1	10	-	85955708	85956724	1017	0	0	0	0	NA	NA	NA	NA	NA
AC205419.3_FG001	Refgen1	9	-	138386054	138390489	3099	544	714	26.31	35.115	0.44	7.99633e-08	8.85739e-07	no	hypothetical protein LOC100274177
AC205470.3_FG008	Refgen1	7	+	84490698	84492622	1887	0	0	0	0	NA	NA	NA	NA	NA
AC205471.4_FG003	Refgen1	8	-	123758896	123760659	1341	4	3	0.447	0.341	NA	NA	NA	NA	NA
AC205471.4_FG006	Refgen1	8	-	123876960	123881672	1356	0	0	0	0	NA	NA	NA	NA	NA
AC205471.4_FG007	Refgen1	8	-	123841947	123842147	201	81	33	60.399	25.023	-1.22	1.32819e-05	9.36562e-05	yes	hypothetical protein LOC100303799 (LOC100303799), mRNA
AC205471.4_FG008	Refgen1	8	-	123812404	123813801	1398	0	0	0	0	NA	NA	NA	NA	NA
AC205485.3_FG011	Refgen1	4	-	182159442	182162283	2289	0	0	0	0	NA	NA	NA	NA	NA
AC205492.3_FG002	Refgen1	5	+	99732699	99734209	1470	5	1	0.51	0.104	NA	NA	NA	NA	NA
AC205500.3_FG002	Refgen1	1	-	105511734	105513334	936	7	2	1.121	0.326	NA	NA	NA	NA	NA
AC205502.4_FG002	Refgen1	1	-	59425663	59435311	2808	0	0	0	0	NA	NA	NA	NA	NA
AC205502.4_FG003	Refgen1	1	+	59528033	59531337	636	53	44	12.49	10.544	-0.22	0.478198	0.615162	no	NA
AC205502.4_FG004	Refgen1	1	-	59532663	59535162	1614	25	9	2.322	0.85	NA	NA	NA	NA	hypothetical protein LOC100273678
AC205502.4_FG005	Refgen1	1	-	59570982	59573684	1065	18	19	2.533	2.719	NA	NA	NA	NA	NA
AC205521.3_FG003	Refgen1	4	+	76667670	76670254	1287	208	200	24.223	23.685	-0.01	0.960541	0.989011	no	hypothetical protein LOC100274397
AC205536.3_FG003	Refgen1	5	-	99998854	100000233	1380	552	429	59.952	47.38	-0.32	0.000704229	0.00307223	no	NA
AC205562.3_FG002	Refgen1	4	+	80672237	80673199	963	11	5	1.712	0.791	NA	NA	NA	NA	WRKY69 - superfamily of TFs having WRKY and zinc finger domains
AC205564.3_FG001	Refgen1	3	+	195563653	195565089	474	2	9	0.632	2.894	NA	NA	NA	NA	NA
AC205568.3_FG007	Refgen1	9	+	134104504	134107667	945	134	113	21.253	18.225	-0.2	0.30858	0.446364	no	NA
AC205574.3_FG006	Refgen1	3	+	3430538	3433199	1698	48	40	4.237	3.59	-0.21	0.523102	0.654651	no	mutant cincinnata
AC205605.3_FG002	Refgen1	6	+	56456252	56456959	708	0	0	0	0	NA	NA	NA	NA	NA
AC205608.4_FG004	Refgen1	2	-	207517330	207519335	1545	763	537	74.018	52.974	-0.46	1.42539e-08	1.80069e-07	no	LOC100283453
AC205615.4_FG002	Refgen1	4	-	82061466	82076590	477	0	0	0	0	NA	NA	NA	NA	NA
AC205620.3_FG003	Refgen1	9	-	89725126	89726338	792	0	0	0	0	NA	NA	NA	NA	NA
AC205674.4_FG001	Refgen1	1	-	78848117	78848662	546	0	0	0	0	NA	NA	NA	NA	NA
AC205677.3_FG001	Refgen1	6	+	4889277	4895564	3429	191	256	8.348	11.379	0.47	0.000647748	0.00286436	no	NA
AC205677.3_FG002	Refgen1	6	-	4898960	4899653	423	171	134	60.589	48.282	-0.3	0.0671333	0.137472	no	NA
AC205677.3_FG005	Refgen1	6	+	4842492	4848967	2445	544	407	33.347	25.371	-0.37	8.53715e-05	0.000488513	no	NA
AC205703.4_FG001	Refgen1	5	+	180230755	180232478	498	2	5	0.602	1.53	NA	NA	NA	NA	BCL-2 binding anthanogene-1
AC205703.4_FG005	Refgen1	5	+	180409847	180412871	1542	24	25	2.333	2.471	0.1	0.886618	0.940423	no	NA
AC205703.4_FG007	Refgen1	5	-	180415454	180416110	657	236	236	53.838	54.748	0.05	0.747318	0.840312	no	NA
AC205703.4_FG008	Refgen1	5	-	180417992	180420743	2154	11	22	0.765	1.557	NA	NA	NA	NA	NA
AC205703.4_FG010	Refgen1	5	+	180422803	180426489	3462	143	130	6.191	5.723	-0.09	0.628438	0.744898	no	NA
AC205709.3_FG001	Refgen1	9	+	130445084	130446352	1155	0	0	0	0	NA	NA	NA	NA	NA
AC205713.4_FG004	Refgen1	1	+	228321710	228322030	321	0	0	0	0	NA	NA	NA	NA	NA
AC205725.3_FG010	Refgen1	1	-	23642724	23646208	1092	45	84	6.176	11.724	0.93	0.000287183	0.00141777	no	NA
AC205730.3_FG001	Refgen1	1	-	166219506	166222077	2001	1	3	0.075	0.229	NA	NA	NA	NA	NA
AC205730.3_FG002	Refgen1	1	-	166195680	166212199	1602	75	117	7.017	11.131	0.68	0.00113442	0.00460431	no	NA
AC205735.3_FG006	Refgen1	4	-	210942287	210943675	1389	16	26	1.726	2.853	0.71	0.122174	0.220109	no	hypothetical protein LOC100384682
AC205791.3_FG005	Refgen1	1	-	215412335	215420733	1455	1	0	0.103	0	NA	NA	NA	NA	NA
AC205814.3_FG003	Refgen1	1	+	194627511	194632279	858	6	15	1.048	2.665	NA	NA	NA	NA	NA
AC205820.3_FG002	Refgen1	4	-	210835226	210837075	1116	31	43	4.163	5.873	0.51	0.131726	0.233117	no	NA
AC205834.3_FG003	Refgen1	4	+	228575354	228577976	2481	0	0	0	0	NA	NA	NA	NA	NA
AC205853.3_FG014	Refgen1	4	+	244835654	244838614	2694	0	0	0	0	NA	NA	NA	NA	NA
AC205886.3_FG001	Refgen1	6	+	89704319	89713047	1011	34	37	5.04	5.578	0.17	0.636851	0.752205	no	NA
AC205888.4_FG004	Refgen1	1	+	59203116	59206541	2421	0	0	0	0	NA	NA	NA	NA	NA
AC205976.3_FG004	Refgen1	3	-	149667942	149668742	801	0	0	0	0	NA	NA	NA	NA	NA
AC206030.4_FG001	Refgen1	1	-	197315854	197317446	1593	51	27	4.798	2.583	-0.85	0.0122631	0.0342597	no	hypothetical protein LOC100382626
AC206031.3_FG005	Refgen1	1	+	199607494	199609189	1074	53	32	7.396	4.541	-0.66	0.0388336	0.0880122	no	NA
AC206060.3_FG001	Refgen1	9	+	1850464	1853760	2784	180	220	9.69	12.044	0.34	0.021346	0.0541206	no	NA
AC206165.3_FG007	Refgen1	6	-	159738867	159740525	1410	5	0	0.531	0	NA	NA	NA	NA	NA
AC206165.3_FG009	Refgen1	6	-	159753809	159754186	378	0	0	0	0	NA	NA	NA	NA	NA
AC206168.2_FG003	Refgen1	9	+	108176308	108180745	1083	0	0	0	0	NA	NA	NA	NA	NA
AC206184.4_FG002	Refgen1	6	-	41664277	41664858	582	0	0	0	0	NA	NA	NA	NA	NA
AC206185.3_FG002	Refgen1	6	-	116496563	116497744	1182	0	0	0	0	NA	NA	NA	NA	NA
AC206201.3_FG009	Refgen1	1	-	293835565	293839948	2196	1	1	0.068	0.069	NA	NA	NA	NA	NA
AC206217.2_FG006	Refgen1	6	+	151964335	151964895	561	0	0	0	0	NA	NA	NA	NA	NA
AC206223.3_FG001	Refgen1	9	-	133013063	133015460	1263	28	14	3.323	1.689	-0.9	0.0447344	0.0991686	no	pherophorin like protein
AC206223.3_FG002	Refgen1	9	-	133022267	133028784	2103	56	52	3.991	3.769	-0.06	0.84791	0.912739	no	NA
AC206223.3_FG004	Refgen1	9	-	132852376	132859535	1842	0	0	0	0	NA	NA	NA	NA	NA
AC206223.3_FG006	Refgen1	9	+	132938663	132941223	1785	13	15	1.092	1.281	NA	NA	NA	NA	hypothetical protein LOC100280156 (LOC100280156), mRNA
AC206223.3_FG007	Refgen1	9	+	132961167	132961922	756	0	1	0	0.202	NA	NA	NA	NA	NA
AC206223.3_FG008	Refgen1	9	+	132963684	132967103	2916	2	4	0.103	0.209	NA	NA	NA	NA	hypothetical protein LOC100273523
AC206223.3_FG010	Refgen1	9	+	132973245	132973689	321	70	48	32.684	22.791	-0.49	0.0661019	0.135742	no	NA
AC206259.3_FG002	Refgen1	1	+	291606304	291609171	2721	3	4	0.165	0.224	NA	NA	NA	NA	NA
AC206259.3_FG003	Refgen1	1	-	291602003	291605691	2301	324	454	21.104	30.072	0.53	3.30652e-07	3.30426e-06	no	NA
AC206266.3_FG001	Refgen1	9	+	17807930	17811014	1560	0	0	0	0	NA	NA	NA	NA	NA
AC206283.3_FG003	Refgen1	10	+	36607154	36614590	1614	19	33	1.764	3.116	0.81	0.0511681	0.110445	no	NA
AC206319.2_FG004	Refgen1	6	-	87033174	87033611	438	0	0	0	0	NA	NA	NA	NA	NA
AC206325.3_FG003	Refgen1	4	+	5805081	5808646	1551	0	0	0	0	NA	NA	NA	NA	NA
AC206326.3_FG004	Refgen1	1	+	76055675	76057771	2097	10	15	0.715	1.09	NA	NA	NA	NA	NA
AC206332.3_FG005	Refgen1	4	+	124319500	124322333	1773	0	0	0	0	NA	NA	NA	NA	NA
AC206344.3_FG004	Refgen1	2	+	153087417	153090058	2391	1	0	0.063	0	NA	NA	NA	NA	NA
AC206349.2_FG002	Refgen1	6	+	7461430	7462212	783	0	0	0	0	NA	NA	NA	NA	NA
AC206350.3_FG005	Refgen1	3	+	15229115	15230203	1089	0	0	0	0	NA	NA	NA	NA	dirigent-like protein
AC206392.3_FG004	Refgen1	2	+	82094087	82094433	285	0	0	0	0	NA	NA	NA	NA	NA
AC206425.3_FG002	Refgen1	3	-	128227996	128228741	648	15	3	3.469	0.706	NA	NA	NA	NA	LOC100283929
AC206425.3_FG004	Refgen1	3	+	128157367	128158855	657	1	0	0.228	0	NA	NA	NA	NA	NA
AC206514.2_FG001	Refgen1	6	+	82617384	82621261	1962	255	101	19.48	7.846	-1.28	1.7072e-15	4.59817e-14	yes	NA
AC206586.2_FG007	Refgen1	2	+	213996036	213998626	705	3	8	0.638	1.729	NA	NA	NA	NA	NA
AC206611.3_FG003	Refgen1	2	-	142256095	142257649	1095	2	0	0.274	0	NA	NA	NA	NA	NA
AC206634.3_FG004	Refgen1	5	+	63394064	63395326	456	0	0	0	0	NA	NA	NA	NA	NA
AC206638.3_FG007	Refgen1	2	+	3072477	3072896	420	1	0	0.357	0	NA	NA	NA	NA	VQ motif family protein
AC206638.3_FG015	Refgen1	2	-	3178042	3178305	189	0	0	0	0	NA	NA	NA	NA	NA
AC206642.4_FG001	Refgen1	2	+	77511838	77513617	372	369	297	148.671	121.684	-0.26	0.0180787	0.0471223	no	60S ribosomal protein L35
AC206761.3_FG002	Refgen1	2	+	179964385	179972880	1227	452	617	55.212	76.641	0.5	2.41093e-08	2.9011e-07	no	NA
AC206763.3_FG002	Refgen1	2	-	179514868	179518056	1296	0	0	0	0	NA	NA	NA	NA	NA
AC206764.4_FG001	Refgen1	3	-	690875	692941	2067	7	7	0.508	0.516	NA	NA	NA	NA	NA
AC206764.4_FG003	Refgen1	3	-	654965	655642	678	0	1	0	0.225	NA	NA	NA	NA	hypothetical protein LOC100278164
AC206764.4_FG005	Refgen1	3	-	737538	741529	729	0	0	0	0	NA	NA	NA	NA	NA
AC206768.3_FG005	Refgen1	3	-	106633179	106633634	456	2	3	0.657	1.003	NA	NA	NA	NA	NA
AC206780.3_FG004	Refgen1	4	-	244709919	244712629	2604	2	7	0.115	0.41	NA	NA	NA	NA	NA
AC206788.3_FG015	Refgen1	6	+	160010851	160012345	1446	162	104	16.791	10.962	-0.59	0.00111663	0.00454311	no	hypothetical protein LOC100191664
AC206832.3_FG004	Refgen1	4	-	153150315	153151022	708	0	0	0	0	NA	NA	NA	NA	NA
AC206840.3_FG002	Refgen1	1	+	57387951	57388271	321	28	33	13.074	15.669	0.28	0.446173	0.586136	no	hypothetical protein LOC100278758
AC206898.3_FG006	Refgen1	5	-	31749680	31752603	1143	5	2	0.656	0.267	NA	NA	NA	NA	NA
AC206901.3_FG005	Refgen1	10	-	130350484	130352048	834	8	1	1.438	0.183	NA	NA	NA	NA	hypothetical protein LOC100272967
AC206941.2_FG002	Refgen1	5	-	12245824	12246384	561	0	0	0	0	NA	NA	NA	NA	Oleosin Zm-II (Oleosin 18 kDa)(Lipid body-associated protein L2)
AC206951.3_FG016	Refgen1	1	-	17453852	17454667	816	6	2	1.102	0.374	NA	NA	NA	NA	Putative uncharacterized protein
AC206951.3_FG017	Refgen1	1	-	17460600	17461520	921	160	74	26.038	12.246	-1.05	6.26805e-08	7.08375e-07	yes	ethylene-responsive element binding protein 2
AC206968.3_FG003	Refgen1	2	-	46761404	46762684	1281	196	223	22.932	26.532	0.23	0.106771	0.198097	no	LOC100284700
AC206980.3_FG007	Refgen1	2	-	5147621	5148196	576	0	0	0	0	NA	NA	NA	NA	NA
AC207001.3_FG001	Refgen1	5	-	117201611	117202491	852	7	5	1.231	0.894	NA	NA	NA	NA	NA
AC207019.3_FG003	Refgen1	1	+	249755095	249755896	669	0	0	0	0	NA	NA	NA	NA	NA
AC207043.3_FG002	Refgen1	5	+	85296281	85296964	684	3	2	0.657	0.446	NA	NA	NA	NA	VQ motif family protein
AC207043.3_FG004	Refgen1	5	-	85217652	85219727	963	0	0	0	0	NA	NA	NA	NA	NA
AC207080.3_FG005	Refgen1	5	+	186658277	186660884	1590	0	0	0	0	NA	NA	NA	NA	NA
AC207107.4_FG002	Refgen1	5	+	61252168	61255789	780	1	0	0.192	0	NA	NA	NA	NA	NA
AC207225.3_FG003	Refgen1	1	+	123529398	123531121	1368	27	15	2.958	1.671	-0.76	0.0902186	0.173747	no	NA
AC207265.3_FG002	Refgen1	9	+	14722492	14728735	1674	260	207	23.279	18.847	-0.28	0.0372529	0.0852033	no	NA
AC207309.3_FG010	Refgen1	9	+	121610838	121611278	441	0	0	0	0	NA	NA	NA	NA	NA
AC207321.3_FG003	Refgen1	3	+	173494211	173495752	1542	0	0	0	0	NA	NA	NA	NA	NA
AC207342.3_FG001	Refgen1	8	+	135064066	135065591	1185	0	0	0	0	NA	NA	NA	NA	NA
AC207342.3_FG004	Refgen1	8	+	135079859	135081151	729	6	3	1.234	0.627	NA	NA	NA	NA	NA
AC207342.3_FG007	Refgen1	8	-	135099297	135102570	855	33	38	5.785	6.774	0.25	0.478712	0.61535	no	hypothetical protein LOC100193373
AC207342.3_FG008	Refgen1	8	+	135096547	135098597	1029	633	396	92.2	58.654	-0.63	5.81176e-12	1.14767e-10	no	Putative uncharacterized protein
AC207347.3_FG005	Refgen1	1	-	249488566	249495217	1485	167	195	16.855	20.014	0.27	0.0826535	0.162394	no	NA
AC207394.3_FG004	Refgen1	5	-	131820119	131821977	1080	126	147	17.486	20.745	0.27	0.130247	0.231146	no	NA
AC207397.3_FG001	Refgen1	4	-	107658489	107661234	2133	0	0	0	0	NA	NA	NA	NA	NA
AC207415.3_FG001	Refgen1	3	-	113500221	113500786	477	15	6	4.713	1.917	NA	NA	NA	NA	NA
AC207454.3_FG004	Refgen1	9	-	128948391	128948936	546	0	0	0	0	NA	NA	NA	NA	NA
AC207466.3_FG003	Refgen1	5	-	106408906	106409724	597	775	667	194.567	170.283	-0.17	0.0269192	0.0652821	no	NA
AC207533.2_FG002	Refgen1	2	+	149391836	149392198	363	6	6	2.477	2.519	NA	NA	NA	NA	NA
AC207546.3_FG004	Refgen1	1	+	296845553	296846833	669	0	0	0	0	NA	NA	NA	NA	NA
AC207559.3_FG004	Refgen1	7	-	47023402	47024259	858	90	67	15.722	11.902	-0.37	0.110483	0.203451	no	NA
AC207565.2_FG004	Refgen1	2	-	154695094	154697877	1770	3	0	0.254	0	NA	NA	NA	NA	NA
AC207619.3_FG001	Refgen1	1	+	192727237	192728496	513	0	0	0	0	NA	NA	NA	NA	NA
AC207628.4_FG002	Refgen1	3	-	201070744	201071574	831	0	0	0	0	NA	NA	NA	NA	NA
AC207628.4_FG003	Refgen1	3	-	201108521	201119035	5469	25	13	0.685	0.362	NA	NA	NA	NA	hypothetical protein LOC100192486
AC207628.4_FG004	Refgen1	3	+	201141450	201144081	906	0	0	0	0	NA	NA	NA	NA	NA
AC207628.4_FG005	Refgen1	3	+	201151131	201153586	834	1	0	0.18	0	NA	NA	NA	NA	outer mitochondrial membrane protein porin
AC207628.4_FG006	Refgen1	3	-	201154392	201165880	1725	723	1024	62.819	90.475	0.55	2.90179e-15	7.65541e-14	no	NA
AC207628.4_FG009	Refgen1	3	-	201037870	201044286	2163	138	188	9.562	13.247	0.49	0.00228179	0.00844097	no	NA
AC207628.4_FG010	Refgen1	3	-	201048156	201049054	828	39	24	7.06	4.418	-0.63	0.100647	0.189001	no	hypothetical protein LOC100191711
AC207628.4_FG011	Refgen1	3	+	201055697	201059621	1728	149	137	12.924	12.084	-0.07	0.679224	0.785936	no	NA
AC207652.3_FG001	Refgen1	3	-	37841407	37847584	2889	69	75	3.58	3.957	0.17	0.505642	0.640273	no	NA
AC207652.3_FG002	Refgen1	3	-	37908321	37910500	447	80	74	26.824	25.232	-0.06	0.809223	0.884024	no	NA
AC207652.3_FG003	Refgen1	3	-	37918171	37921430	717	257	252	53.722	53.567	0.02	0.894258	0.944876	no	NA
AC207655.2_FG003	Refgen1	7	+	131183466	131188059	699	1	0	0.214	0	NA	NA	NA	NA	NA
AC207656.3_FG002	Refgen1	5	+	48559282	48561684	2151	243	97	16.932	6.873	-1.27	1.30417e-14	3.24606e-13	yes	hypothetical protein LOC100280136
AC207722.2_FG009	Refgen1	7	-	141484579	141485352	774	32998	10324	6389.81	2032.95	-1.63	0	0	yes	Chlorophyll a-b binding protein 1, chloroplastic Precursor (LHCII type I CAB-1)(LHCP)
AC207732.3_FG009	Refgen1	2	+	183773746	183777324	1026	36	88	5.259	13.072	1.31	1.33531e-06	1.17735e-05	yes	NA
AC207733.3_FG007	Refgen1	2	-	123622049	123622929	738	0	0	0	0	NA	NA	NA	NA	NA
AC207755.3_FG005	Refgen1	10	-	5690971	5692981	879	428	155	72.979	26.876	-1.41	9.1483e-29	5.29462e-27	yes	NA
AC207755.3_FG006	Refgen1	10	+	5597566	5598563	843	8	4	1.422	0.723	NA	NA	NA	NA	NA
AC207756.3_FG001	Refgen1	4	-	143559433	143561585	387	3	4	1.162	1.575	NA	NA	NA	NA	NA
AC207767.2_FG001	Refgen1	3	+	190665709	190666896	1188	0	0	0	0	NA	NA	NA	NA	NA
AC207798.2_FG003	Refgen1	6	+	128724676	128725986	657	14	14	3.194	3.248	NA	NA	NA	NA	NA
AC207814.3_FG002	Refgen1	3	+	58209005	58210150	1146	0	0	0	0	NA	NA	NA	NA	NA
AC207814.3_FG003	Refgen1	3	-	58205290	58208278	2058	0	0	0	0	NA	NA	NA	NA	NA
AC207888.3_FG009	Refgen1	2	+	231242566	231244617	2052	0	2	0	0.149	NA	NA	NA	NA	NA
AC207890.3_FG002	Refgen1	4	+	101810090	101815586	2961	368	501	18.627	25.788	0.49	5.82976e-07	5.58254e-06	no	hypothetical protein LOC100280237
AC208023.3_FG001	Refgen1	9	+	105613603	105613918	276	139	55	75.483	30.372	-1.27	5.58344e-09	7.51317e-08	yes	protein transport protein SEC61 gamma subunit
AC208026.3_FG005	Refgen1	1	-	196511761	196513569	867	0	0	0	0	NA	NA	NA	NA	NA
AC208031.3_FG002	Refgen1	7	+	124114412	124115353	594	9	3	2.271	0.77	NA	NA	NA	NA	hypothetical protein LOC100278455
AC208031.3_FG005	Refgen1	7	+	124124520	124127682	477	1	6	0.314	1.917	NA	NA	NA	NA	NA
AC208082.3_FG008	Refgen1	5	-	13911766	13914819	606	0	0	0	0	NA	NA	NA	NA	NA
AC208110.2_FG001	Refgen1	10	+	140307691	140310563	1584	1	0	0.095	0	NA	NA	NA	NA	NA
AC208110.2_FG005	Refgen1	10	+	140373096	140374454	1116	0	0	0	0	NA	NA	NA	NA	NA
AC208110.2_FG006	Refgen1	10	+	140378142	140379916	1680	56	22	4.996	1.996	-1.26	0.000240052	0.00121376	no	NA
AC208110.2_FG007	Refgen1	10	-	140380714	140381349	315	45	34	21.411	16.451	-0.35	0.311475	0.449153	no	seed specific protein Bn15D1B
AC208110.2_FG008	Refgen1	10	+	140385328	140385828	444	17	10	5.739	3.433	NA	NA	NA	NA	NA
AC208110.2_FG009	Refgen1	10	+	140392871	140395265	885	0	0	0	0	NA	NA	NA	NA	NA
AC208110.2_FG010	Refgen1	10	+	140399928	140402310	873	0	0	0	0	NA	NA	NA	NA	NA
AC208110.2_FG011	Refgen1	10	+	140277915	140279985	1734	0	0	0	0	NA	NA	NA	NA	NA
AC208113.3_FG005	Refgen1	1	+	262136703	262137857	1155	21	17	2.725	2.243	NA	NA	NA	NA	hypothetical protein LOC100275787
AC208113.3_FG006	Refgen1	1	-	262138227	262141579	1452	1569	1426	161.956	149.683	-0.09	0.0891537	0.172252	no	NA
AC208125.3_FG008	Refgen1	1	+	191385368	191389635	1746	34	41	2.919	3.579	0.31	0.357472	0.49809	no	NA
AC208126.3_FG001	Refgen1	4	-	241358324	241358746	306	0	0	0	0	NA	NA	NA	NA	gamma-thionins family protein
AC208201.3_FG001	Refgen1	1	+	45562003	45564147	1101	108	82	14.702	11.351	-0.35	0.110198	0.203082	no	hypothetical protein LOC100191274
AC208201.3_FG002	Refgen1	1	+	45527914	45529352	1167	25	38	3.211	4.963	0.63	0.0791123	0.15695	no	hypothetical protein LOC100383423
AC208201.3_FG003	Refgen1	1	+	45499745	45502318	1668	207	116	18.6	10.599	-0.78	1.96754e-06	1.67476e-05	no	NA
AC208204.3_FG006	Refgen1	1	+	38695180	38695656	477	26	10	8.17	3.195	NA	NA	NA	NA	hypothetical protein LOC100274593
AC208217.3_FG001	Refgen1	5	-	83804055	83804282	228	0	0	0	0	NA	NA	NA	NA	NA
AC208221.3_FG002	Refgen1	2	+	38386809	38389415	744	268	242	53.989	49.575	-0.1	0.45161	0.591282	no	NA
AC208327.4_FG002	Refgen1	8	+	125114496	125124171	1287	2	3	0.233	0.355	NA	NA	NA	NA	NA
AC208327.4_FG003	Refgen1	8	+	125162934	125170175	1134	40	78	5.287	10.483	0.99	0.000292422	0.00143994	no	hypothetical protein LOC100217083
AC208327.4_FG006	Refgen1	8	+	125228446	125230506	1125	102	99	13.589	13.412	0	1	1	no	hypothetical protein LOC100191451
AC208337.2_FG003	Refgen1	7	-	10669838	10675968	1296	0	0	0	0	NA	NA	NA	NA	NA
AC208338.3_FG010	Refgen1	6	+	81620242	81623819	984	0	0	0	0	NA	NA	NA	NA	NA
AC208341.4_FG005	Refgen1	8	-	95147821	95148321	501	91	51	27.224	15.515	-0.78	0.0018048	0.00689518	no	pleckstrin homology domain-containing protein 1
AC208341.4_FG006	Refgen1	8	-	95155701	95161786	912	30	31	4.93	5.181	0.09	0.799672	0.876838	no	NA
AC208341.4_FG007	Refgen1	8	-	95054641	95055732	855	0	0	0	0	NA	NA	NA	NA	NA
AC208341.4_FG009	Refgen1	8	+	95069653	95070896	1017	21	5	3.095	0.749	NA	NA	NA	NA	NA
AC208346.3_FG004	Refgen1	3	-	181829193	181831136	1944	50	47	3.855	3.685	-0.04	0.919336	0.959192	no	hypothetical protein LOC100381723
AC208348.3_FG005	Refgen1	5	+	215801364	215803969	1131	215	249	28.492	33.555	0.26	0.0568789	0.120151	no	NA
AC208348.3_FG012	Refgen1	5	+	215758253	215759827	1575	38	28	3.616	2.71	-0.38	0.324751	0.463423	no	NA
AC208358.3_FG005	Refgen1	4	-	67317184	67318616	1293	44	18	5.1	2.122	-1.2	0.0014186	0.00560402	no	NA
AC208363.3_FG004	Refgen1	5	+	68081398	68087909	1248	25	30	3.002	3.664	0.3	0.500524	0.635283	no	NA
AC208411.3_FG013	Refgen1	5	-	147160498	147162362	756	0	0	0	0	NA	NA	NA	NA	NA
AC208415.3_FG003	Refgen1	5	-	38257572	38261795	1347	203	193	22.588	21.838	-0.03	0.880213	0.937139	no	NA
AC208418.3_FG009	Refgen1	4	+	225119860	225121438	1155	0	0	0	0	NA	NA	NA	NA	NA
AC208422.3_FG001	Refgen1	2	-	146223407	146224319	552	0	0	0	0	NA	NA	NA	NA	NA
AC208434.3_FG001	Refgen1	1	-	203804953	203808481	993	0	0	0	0	NA	NA	NA	NA	NA
AC208436.3_FG007	Refgen1	1	+	45260787	45267412	3042	16	17	0.788	0.852	NA	NA	NA	NA	NA
AC208440.3_FG002	Refgen1	1	-	226658785	226661566	909	34	53	5.606	8.887	0.67	0.031732	0.0745645	no	NA
AC208440.3_FG003	Refgen1	1	-	226789957	226796457	2184	52	92	3.569	6.42	0.86	0.000434853	0.00202544	no	NA
AC208521.3_FG002	Refgen1	6	+	55663088	55665687	648	0	1	0	0.235	NA	NA	NA	NA	NA
AC208559.3_FG003	Refgen1	4	-	123935396	123938084	912	5	1	0.822	0.167	NA	NA	NA	NA	NA
AC208564.3_FG004	Refgen1	1	+	186581868	186583154	384	0	0	0	0	NA	NA	NA	NA	NA
AC208571.4_FG001	Refgen1	1	+	50801064	50812843	714	228	244	47.861	52.085	0.14	0.289703	0.425312	no	NA
AC208576.3_FG001	Refgen1	1	-	63612132	63613499	1368	3	2	0.329	0.223	NA	NA	NA	NA	NA
AC208625.3_FG004	Refgen1	10	-	94778707	94779373	309	0	0	0	0	NA	NA	NA	NA	NA
AC208649.4_FG003	Refgen1	10	+	19421296	19424687	1053	0	0	0	0	NA	NA	NA	NA	NA
AC208663.3_FG002	Refgen1	2	+	30359463	30360551	1089	0	0	0	0	NA	NA	NA	NA	NA
AC208680.3_FG001	Refgen1	1	+	95081004	95081633	630	0	0	0	0	NA	NA	NA	NA	NA
AC208791.3_FG003	Refgen1	1	-	230216283	230221561	720	21	15	4.371	3.175	NA	NA	NA	NA	NA
AC208803.3_FG002	Refgen1	2	-	2332856	2333492	336	25	20	11.152	9.072	-0.26	0.553897	0.681737	no	NA
AC208829.4_FG001	Refgen1	9	+	5014266	5017162	462	6	10	1.946	3.299	NA	NA	NA	NA	NA
AC208833.3_FG005	Refgen1	4	+	154959366	154965479	1887	60	74	4.766	5.977	0.35	0.167624	0.280986	no	NA
AC208860.3_FG002	Refgen1	9	+	136343294	136346256	861	0	0	0	0	NA	NA	NA	NA	NA
AC208892.3_FG005	Refgen1	2	+	213307249	213308390	780	3	0	0.576	0	NA	NA	NA	NA	NA
AC208897.3_FG001	Refgen1	1	-	27339896	27343996	1212	0	0	0	0	NA	NA	NA	NA	NA
AC208897.3_FG002	Refgen1	1	-	27354348	27357095	1236	54	50	6.548	6.166	-0.06	0.844998	0.910484	no	NA
AC208897.3_FG003	Refgen1	1	+	27221305	27225550	1881	10	16	0.797	1.296	NA	NA	NA	NA	hypothetical protein LOC100383408
AC208897.3_FG004	Refgen1	1	-	27227006	27232497	1617	183	320	16.962	30.162	0.85	7.76842e-11	1.34927e-09	yes	NA
AC208902.3_FG003	Refgen1	6	-	139618400	139620073	711	13	11	2.74	2.358	NA	NA	NA	NA	NA
AC208912.2_FG002	Refgen1	6	-	151056585	151058677	420	52	46	18.556	16.693	-0.13	0.686923	0.791068	no	NA
AC208915.3_FG010	Refgen1	3	+	221875711	221876490	780	0	0	0	0	NA	NA	NA	NA	NA
AC208920.3_FG001	Refgen1	4	+	85560500	85561182	516	0	0	0	0	NA	NA	NA	NA	NA
AC209015.3_FG004	Refgen1	6	-	102477936	102478472	537	0	0	0	0	NA	NA	NA	NA	NA
AC209016.3_FG010	Refgen1	1	-	296135825	296139853	939	1	3	0.16	0.487	NA	NA	NA	NA	NA
AC209029.2_FG002	Refgen1	4	+	20835815	20838553	879	0	0	0	0	NA	NA	NA	NA	NA
AC209050.3_FG001	Refgen1	6	-	96610464	96614318	2775	0	0	0	0	NA	NA	NA	NA	NA
AC209050.3_FG002	Refgen1	6	+	96526063	96529811	1476	397	471	40.313	48.636	0.29	0.00280281	0.00999783	no	NA
AC209050.3_FG003	Refgen1	6	+	96519666	96521226	1398	2	7	0.214	0.763	NA	NA	NA	NA	NA
AC209057.2_FG004	Refgen1	1	+	18341001	18344482	1299	26	30	3	3.52	0.25	0.593351	0.715787	no	NA
AC209073.3_FG002	Refgen1	8	-	160014144	160017211	1203	0	0	0	0	NA	NA	NA	NA	NA
AC209206.3_FG004	Refgen1	10	+	137209047	137209751	705	0	0	0	0	NA	NA	NA	NA	NA
AC209206.3_FG008	Refgen1	10	-	137132416	137136558	1797	200	188	16.681	15.945	-0.04	0.799667	0.876838	no	NA
AC209206.3_FG011	Refgen1	10	+	137113643	137120181	3279	83	102	3.794	4.741	0.34	0.106354	0.197456	no	NA
AC209206.3_FG014	Refgen1	10	-	137090376	137092756	1641	0	0	0	0	NA	NA	NA	NA	NA
AC209208.3_FG001	Refgen1	5	-	192787112	192795390	2967	200	180	10.103	9.246	-0.1	0.504866	0.639436	no	NA
AC209208.3_FG002	Refgen1	5	+	192783771	192786620	870	1544	1084	265.993	189.902	-0.46	3.5654e-16	1.02115e-14	no	Aquaporin PIP1-2 (Plasma membrane intrinsic protein 1-2)(ZmPIP1-2)(ZmPIP1;2)(ZmPIP1b)
AC209208.3_FG003	Refgen1	5	+	192776580	192778931	2352	22	5	1.402	0.324	NA	NA	NA	NA	NA
AC209208.3_FG005	Refgen1	5	-	192714051	192717563	756	70	104	13.878	20.967	0.61	0.006184	0.0194351	no	hypothetical protein LOC100278464
AC209212.3_FG005	Refgen1	1	-	298568563	298571223	2661	0	1	0	0.057	NA	NA	NA	NA	NA
AC209215.4_FG004	Refgen1	1	-	98857781	98865879	1428	0	0	0	0	NA	NA	NA	NA	NA
AC209215.4_FG006	Refgen1	1	+	98869940	98871761	342	0	0	0	0	NA	NA	NA	NA	NA
AC209242.3_FG002	Refgen1	4	-	237747351	237766361	1044	35	74	5.025	10.803	1.11	0.000107708	0.000598914	yes	NA
AC209242.3_FG003	Refgen1	4	-	237738826	237743084	1248	35	45	4.203	5.496	0.4	0.219788	0.345408	no	NA
AC209243.2_FG002	Refgen1	3	-	64373780	64374980	810	0	0	0	0	NA	NA	NA	NA	NA
AC209257.4_FG003	Refgen1	6	+	153377259	153378438	963	11	3	1.712	0.475	NA	NA	NA	NA	NA
AC209257.4_FG004	Refgen1	6	+	153382907	153383327	291	0	0	0	0	NA	NA	NA	NA	NA
AC209257.4_FG006	Refgen1	6	+	153385623	153386087	465	5	6	1.612	1.967	NA	NA	NA	NA	NA
AC209257.4_FG007	Refgen1	6	-	153389961	153391928	1743	48	42	4.127	3.673	-0.14	0.673894	0.780795	no	NA
AC209257.4_FG008	Refgen1	6	+	153392629	153393282	654	157	76	35.98	17.711	-0.99	3.66329e-07	3.63417e-06	yes	hypothetical protein LOC100273220
AC209259.3_FG005	Refgen1	1	+	61201002	61203308	1431	125	77	13.092	8.201	-0.64	0.00189097	0.00716871	no	NA
AC209332.3_FG011	Refgen1	5	-	20924457	20927316	1593	15	11	1.411	1.052	NA	NA	NA	NA	NA
AC209364.3_FG004	Refgen1	3	+	224282078	224284795	2718	3	5	0.165	0.28	NA	NA	NA	NA	NA
AC209364.3_FG009	Refgen1	3	-	224177032	224177727	696	13	12	2.799	2.628	NA	NA	NA	NA	hypothetical protein LOC100278618
AC209374.4_FG001	Refgen1	5	+	195440946	195445978	2652	85	91	4.804	5.23	0.14	0.546571	0.675779	no	NA
AC209374.4_FG002	Refgen1	5	-	195446806	195448548	678	127	83	28.075	18.658	-0.56	0.00566009	0.0180256	no	hypothetical protein LOC100276918
AC209374.4_FG003	Refgen1	5	-	195451091	195462993	675	163	225	36.193	50.804	0.51	0.000542718	0.0024567	no	NA
AC209377.3_FG003	Refgen1	3	-	133775859	133776350	492	13	10	3.96	3.098	NA	NA	NA	NA	hypothetical protein LOC100277374
AC209381.3_FG002	Refgen1	3	-	149812029	149812859	831	0	0	0	0	NA	NA	NA	NA	NA
AC209381.3_FG007	Refgen1	3	-	149933572	149934372	801	0	0	0	0	NA	NA	NA	NA	NA
AC209462.3_FG003	Refgen1	1	+	38369855	38373384	1110	36	42	4.861	5.767	0.26	0.429621	0.57055	no	NA
AC209462.3_FG004	Refgen1	1	+	38374717	38375768	1017	7077	5264	1042.96	788.886	-0.38	7.64353e-48	8.58024e-46	no	NA
AC209463.4_FG013	Refgen1	5	-	215568072	215569109	1038	5	2	0.722	0.294	NA	NA	NA	NA	NA
AC209629.2_FG003	Refgen1	6	-	118889537	118890031	495	0	0	0	0	NA	NA	NA	NA	NA
AC209636.2_FG003	Refgen1	6	+	146733372	146734451	1080	3	5	0.416	0.706	NA	NA	NA	NA	Hsr203J
AC209664.3_FG002	Refgen1	9	+	4595654	4598631	1506	156	118	15.525	11.942	-0.35	0.0460598	0.101448	no	NA
AC209704.3_FG003	Refgen1	2	+	48274009	48275149	948	0	0	0	0	NA	NA	NA	NA	NA
AC209705.3_FG003	Refgen1	9	-	67559206	67561481	1059	154	198	21.795	28.496	0.41	0.00891009	0.0264144	no	NA
AC209705.3_FG004	Refgen1	9	-	67570200	67573183	2721	416	454	22.914	25.43	0.17	0.0778902	0.154947	no	NA
AC209710.4_FG002	Refgen1	7	-	29308398	29309572	474	0	0	0	0	NA	NA	NA	NA	NA
AC209718.1_FG009	Refgen1	3	+	5372110	5374035	1926	5	8	0.389	0.633	NA	NA	NA	NA	NA
AC209729.3_FG003	Refgen1	3	+	218295477	218298452	2913	3	0	0.154	0	NA	NA	NA	NA	NA
AC209732.3_FG001	Refgen1	4	-	92718787	92725402	1026	0	0	0	0	NA	NA	NA	NA	NA
AC209738.3_FG005	Refgen1	3	-	217531422	217532273	852	0	0	0	0	NA	NA	NA	NA	NA
AC209739.3_FG003	Refgen1	2	-	107633313	107634389	1077	0	1	0	0.142	NA	NA	NA	NA	NA
AC209744.3_FG001	Refgen1	3	+	126547751	126548353	525	0	0	0	0	NA	NA	NA	NA	hypothetical protein LOC100304266
AC209755.3_FG001	Refgen1	3	+	210907458	210908298	783	0	0	0	0	NA	NA	NA	NA	NA
AC209755.3_FG002	Refgen1	3	+	210856541	210858699	447	39	37	13.077	12.616	-0.03	1	1	no	NA
AC209755.3_FG003	Refgen1	3	+	210877811	210881369	708	437	419	92.51	90.199	-0.01	0.918324	0.958738	no	NA
AC209768.3_FG005	Refgen1	2	+	230737709	230739208	1500	0	0	0	0	NA	NA	NA	NA	NA
AC209768.3_FG016	Refgen1	2	-	230576087	230576530	444	0	0	0	0	NA	NA	NA	NA	NA
AC209784.3_FG007	Refgen1	3	-	179348763	179351949	1947	1	1	0.077	0.078	NA	NA	NA	NA	NA
AC209784.3_FG011	Refgen1	3	+	179215220	179218017	2049	13	9	0.951	0.669	NA	NA	NA	NA	NA
AC209784.3_FG012	Refgen1	3	+	179209009	179213511	1251	14	11	1.677	1.34	NA	NA	NA	NA	NA
AC209810.3_FG002	Refgen1	3	-	163875307	163876413	1107	0	0	0	0	NA	NA	NA	NA	hypothetical protein LOC100191670
AC209819.3_FG003	Refgen1	8	-	121617969	121621642	594	0	0	0	0	NA	NA	NA	NA	heat- and acid-stable phosphoprotein
AC209819.3_FG005	Refgen1	8	+	121655852	121658012	1095	3	1	0.411	0.139	NA	NA	NA	NA	NA
AC209819.3_FG006	Refgen1	8	-	121668968	121670933	1311	9	6	1.029	0.698	NA	NA	NA	NA	NA
AC209819.3_FG008	Refgen1	8	-	121689407	121690103	552	0	0	0	0	NA	NA	NA	NA	NA
AC209819.3_FG009	Refgen1	8	+	121691516	121692136	621	15	11	3.62	2.7	NA	NA	NA	NA	NA
AC209819.3_FG010	Refgen1	8	+	121581934	121584672	1692	0	0	0	0	NA	NA	NA	NA	NA
AC209819.3_FG011	Refgen1	8	-	121578960	121581483	738	460	449	93.421	92.728	0.01	0.920732	0.96023	no	NA
AC209819.3_FG012	Refgen1	8	+	121576269	121578017	861	25	21	4.352	3.717	-0.19	0.66072	0.77044	no	Rho-related protein from plants 7
AC209835.4_FG004	Refgen1	5	-	21760226	21765442	1398	11	1	1.179	0.109	NA	NA	NA	NA	NA
AC209845.4_FG010	Refgen1	1	-	200341308	200342192	885	15	9	2.54	1.55	NA	NA	NA	NA	NA
AC209858.4_FG002	Refgen1	1	+	11364037	11369698	2769	43	55	2.327	3.027	0.4	0.189123	0.308009	no	NA
AC209858.4_FG003	Refgen1	1	-	11332425	11335280	1482	0	2	0	0.206	NA	NA	NA	NA	NA
AC209858.4_FG004	Refgen1	1	-	11273866	11274549	684	38	25	8.327	5.571	-0.54	0.165223	0.278216	no	hypothetical protein LOC100216560
AC209859.2_FG006	Refgen1	6	+	128227092	128228583	933	0	0	0	0	NA	NA	NA	NA	NA
AC209860.3_FG004	Refgen1	8	-	106152869	106153955	639	0	0	0	0	NA	NA	NA	NA	NA
AC209877.3_FG002	Refgen1	9	-	88842556	88853256	2493	21	30	1.263	1.834	0.54	0.207201	0.330219	no	NA
AC209884.3_FG007	Refgen1	3	-	138083292	138086291	753	0	0	0	0	NA	NA	NA	NA	NA
AC209898.2_FG004	Refgen1	5	+	59051207	59054020	1026	46	40	6.72	5.942	-0.15	0.666763	0.775056	no	NA
AC209919.3_FG002	Refgen1	9	+	24090716	24094924	1764	388	410	32.967	35.425	0.13	0.215489	0.340311	no	NA
AC209946.4_FG001	Refgen1	6	+	72826339	72842057	1353	0	0	0	0	NA	NA	NA	NA	NA
AC209962.3_FG004	Refgen1	8	-	106781873	106782193	321	0	0	0	0	NA	NA	NA	NA	NA
AC209971.4_FG003	Refgen1	4	+	207555114	207555317	204	0	0	0	0	NA	NA	NA	NA	NA
AC209974.4_FG002	Refgen1	5	+	52071544	52072485	942	51	77	8.114	12.458	0.63	0.0133114	0.0367169	no	NA
AC209987.4_FG002	Refgen1	5	-	46091592	46093980	1503	197	121	19.645	12.27	-0.65	8.11589e-05	0.000468091	no	hypothetical protein LOC100273592
AC209987.4_FG005	Refgen1	5	-	46140867	46143535	1362	1	0	0.11	0	NA	NA	NA	NA	NA
AC209987.4_FG009	Refgen1	5	+	46256519	46258289	423	2	12	0.709	4.324	NA	NA	NA	NA	NA
AC209987.4_FG010	Refgen1	5	-	46258759	46259675	810	25	48	4.626	9.032	0.96	0.00482432	0.0157539	no	hypothetical protein LOC100273206
AC209992.3_FG001	Refgen1	3	-	65076081	65077191	1071	57	63	7.977	8.965	0.19	0.522933	0.654635	no	NA
AC210003.2_FG004	Refgen1	2	+	4198666	4200965	999	22	28	3.301	4.272	0.38	0.396454	0.53706	no	hypothetical protein LOC100274427
AC210003.2_FG015	Refgen1	2	-	4180528	4180874	207	140	65	101.368	47.859	-1.05	5.48229e-07	5.28817e-06	yes	Putative uncharacterized protein
AC210009.3_FG008	Refgen1	5	-	169556286	169556615	330	0	0	0	0	NA	NA	NA	NA	NA
AC210013.4_FG001	Refgen1	5	+	3498040	3500498	813	11	11	2.028	2.062	NA	NA	NA	NA	NA
AC210013.4_FG002	Refgen1	5	-	3481766	3482624	720	18	1	3.747	0.212	NA	NA	NA	NA	NA
AC210013.4_FG003	Refgen1	5	+	3474854	3477672	975	7	9	1.076	1.407	NA	NA	NA	NA	cycloartenol-C-24-methyltransferase 1
AC210013.4_FG005	Refgen1	5	-	3319633	3320646	1014	1	6	0.148	0.902	NA	NA	NA	NA	isopentenyl transferase IPT5
AC210013.4_FG006	Refgen1	5	-	3322309	3324687	1053	172	202	24.482	29.238	0.28	0.0627558	0.130279	no	hypothetical protein LOC100217017
AC210013.4_FG007	Refgen1	5	-	3326805	3327998	1194	2	1	0.251	0.128	NA	NA	NA	NA	NA
AC210013.4_FG008	Refgen1	5	+	3329968	3338964	1890	85	124	6.741	10	0.59	0.00359379	0.0123581	no	NA
AC210013.4_FG009	Refgen1	5	+	3342073	3344455	906	23	22	3.805	3.701	-0.01	1	1	no	NA
AC210013.4_FG011	Refgen1	5	+	3373220	3376763	1209	473	540	58.638	68.075	0.24	0.00907349	0.0268133	no	NA
AC210013.4_FG012	Refgen1	5	-	3379793	3380563	771	16	19	3.11	3.756	NA	NA	NA	NA	hypothetical protein LOC100274425
AC210013.4_FG013	Refgen1	5	+	3382931	3387191	1569	92	82	8.788	7.965	-0.12	0.596515	0.718774	no	NA
AC210013.4_FG014	Refgen1	5	-	3388057	3391734	1617	109	72	10.103	6.786	-0.54	0.0114854	0.0325712	no	hypothetical protein LOC100193514
AC210013.4_FG016	Refgen1	5	-	3402214	3403154	252	125	73	74.345	44.151	-0.72	0.000610364	0.00272602	no	Putative uncharacterized protein
AC210013.4_FG017	Refgen1	5	+	3405206	3406822	1422	1	0	0.105	0	NA	NA	NA	NA	hypothetical protein LOC100274254
AC210013.4_FG018	Refgen1	5	-	3407317	3409046	708	17	34	3.599	7.319	1.01	0.0164452	0.0436745	no	hypothetical protein LOC100277775
AC210013.4_FG019	Refgen1	5	-	3410399	3411980	825	443	330	80.481	60.965	-0.38	0.000316846	0.00154281	no	NA
AC210050.3_FG006	Refgen1	10	-	16544984	16551598	3363	9	21	0.401	0.952	NA	NA	NA	NA	NA
AC210050.3_FG007	Refgen1	10	+	16552326	16556449	1371	39	73	4.264	8.115	0.93	0.000861195	0.00363746	no	NA
AC210160.3_FG008	Refgen1	4	-	184531638	184533143	1506	0	0	0	0	NA	NA	NA	NA	NA
AC210163.3_FG005	Refgen1	3	-	168094959	168095303	345	1	0	0.434	0	NA	NA	NA	NA	auxin-inducible protein
AC210168.4_FG003	Refgen1	3	+	122708543	122710089	561	7	5	1.87	1.358	NA	NA	NA	NA	NA
AC210169.3_FG002	Refgen1	5	+	28304331	28306733	2403	107	116	6.674	7.357	0.16	0.421751	0.562651	no	NA
AC210173.4_FG004	Refgen1	1	+	223454616	223458737	1872	0	0	0	0	NA	NA	NA	NA	NA
AC210173.4_FG005	Refgen1	1	+	223425233	223428388	1557	80	39	7.701	3.818	-0.97	0.000325914	0.00157879	no	Cytochrome P450 CYP84A33v1
AC210191.2_FG011	Refgen1	1	-	255509584	255522412	4377	144	135	4.931	4.701	-0.05	0.810879	0.885258	no	NA
AC210193.4_FG002	Refgen1	3	-	194763739	194764578	840	238	114	42.466	20.684	-1.01	2.19165e-10	3.56629e-09	yes	hypothetical protein LOC100276953
AC210202.3_FG008	Refgen1	3	+	208952890	208956119	2862	0	0	0	0	NA	NA	NA	NA	NA
AC210204.3_FG002	Refgen1	2	-	161834439	161835626	921	682	607	110.985	100.45	-0.12	0.139785	0.244029	no	hypothetical protein LOC100274244
AC210413.3_FG005	Refgen1	8	-	125071881	125072765	885	0	0	0	0	NA	NA	NA	NA	NA
AC210422.3_FG009	Refgen1	3	-	220337921	220338676	390	0	0	0	0	NA	NA	NA	NA	NA
AC210517.3_FG003	Refgen1	1	+	120891292	120892054	696	138	103	29.717	22.555	-0.37	0.0459838	0.101347	no	hypothetical protein LOC100193370
AC210528.3_FG003	Refgen1	8	-	123553391	123555962	714	54	35	11.335	7.471	-0.56	0.0712421	0.144034	no	NA
AC210529.3_FG004	Refgen1	3	+	189622121	189622909	582	44	63	11.331	16.498	0.56	0.0527046	0.113134	no	hypothetical protein LOC100191830
AC210595.3_FG004	Refgen1	9	+	42537129	42539896	465	4	9	1.289	2.95	NA	NA	NA	NA	NA
AC210596.3_FG003	Refgen1	6	+	76402098	76404059	1404	4	4	0.427	0.434	NA	NA	NA	NA	NA
AC210596.3_FG004	Refgen1	6	+	76413561	76415716	912	0	0	0	0	NA	NA	NA	NA	NA
AC210598.3_FG003	Refgen1	5	+	176466691	176469541	2229	6	6	0.403	0.41	NA	NA	NA	NA	NA
AC210616.4_FG003	Refgen1	4	+	122986318	122987727	1410	0	0	0	0	NA	NA	NA	NA	NA
AC210616.4_FG005	Refgen1	4	+	123095502	123096827	1326	0	0	0	0	NA	NA	NA	NA	NA
AC210669.3_FG001	Refgen1	8	+	49802495	49803378	834	358	84	64.337	15.351	-2.03	1.7682e-39	1.54842e-37	yes	NA
AC210670.4_FG006	Refgen1	7	+	82808657	82812759	831	1	0	0.18	0	NA	NA	NA	NA	NA
AC210691.2_FG003	Refgen1	7	-	135367606	135368647	714	93	115	19.522	24.548	0.35	0.0829854	0.162893	no	NA
AC210721.4_FG014	Refgen1	5	+	208928184	208929299	1116	1	0	0.134	0	NA	NA	NA	NA	NA
AC210724.2_FG007	Refgen1	2	+	189035521	189036466	693	0	0	0	0	NA	NA	NA	NA	NA
AC210727.4_FG002	Refgen1	10	+	35335127	35337529	813	0	0	0	0	NA	NA	NA	NA	NA
AC210731.3_FG002	Refgen1	6	+	164419143	164419424	282	1	1	0.531	0.54	NA	NA	NA	NA	NA
AC210780.3_FG006	Refgen1	1	+	114907159	114916819	1626	244	243	22.491	22.777	0.04	0.785711	0.866849	no	NA
AC210792.5_FG003	Refgen1	8	+	124823999	124826047	429	0	0	0	0	NA	NA	NA	NA	NA
AC210816.3_FG006	Refgen1	1	-	156198967	156199230	264	4	1	2.271	0.577	NA	NA	NA	NA	Putative uncharacterized protein
AC210848.3_FG004	Refgen1	5	+	89005202	89010578	2277	13	20	0.856	1.339	NA	NA	NA	NA	NA
AC210892.4_FG006	Refgen1	3	+	28285883	28286476	594	0	0	0	0	NA	NA	NA	NA	NA
AC210949.4_FG003	Refgen1	5	-	122259907	122261520	771	0	0	0	0	NA	NA	NA	NA	NA
AC210961.3_FG002	Refgen1	5	+	12105777	12106436	660	0	0	0	0	NA	NA	NA	NA	NA
AC210961.3_FG005	Refgen1	5	-	12159788	12164875	1323	0	1	0	0.115	NA	NA	NA	NA	NA
AC210973.2_FG001	Refgen1	7	+	51227554	51228246	693	0	0	0	0	NA	NA	NA	NA	NA
AC210976.4_FG017	Refgen1	2	-	228367472	228369160	300	0	0	0	0	NA	NA	NA	NA	NA
AC210993.3_FG005	Refgen1	6	+	124923710	124928044	1566	129	141	12.346	13.723	0.17	0.330414	0.4701	no	NA
AC211152.4_FG007	Refgen1	9	-	17373613	17374986	1047	0	0	0	0	NA	NA	NA	NA	NA
AC211164.5_FG003	Refgen1	2	+	189404380	189404745	366	64	29	26.208	12.076	-1.07	0.000555536	0.0025059	no	hypothetical protein LOC100275214
AC211164.5_FG004	Refgen1	2	-	189435768	189437671	1008	26	6	3.866	0.907	NA	NA	NA	NA	hypothetical protein LOC100191304
AC211175.3_FG003	Refgen1	3	-	198114125	198121603	1911	18	24	1.412	1.914	0.44	0.355152	0.495808	no	NA
AC211175.3_FG005	Refgen1	3	-	198031908	198035593	1503	81	104	8.077	10.546	0.4	0.0562321	0.118995	no	Putative uncharacterized protein
AC211178.3_FG004	Refgen1	9	-	141649494	141650306	813	0	0	0	0	NA	NA	NA	NA	NA
AC211181.2_FG006	Refgen1	8	+	127097962	127099614	1089	0	0	0	0	NA	NA	NA	NA	NA
AC211186.3_FG004	Refgen1	8	-	110289473	110290111	639	19	15	4.457	3.578	NA	NA	NA	NA	NA
AC211190.4_FG004	Refgen1	5	+	143787640	143791310	987	0	1	0	0.154	NA	NA	NA	NA	NA
AC211192.3_FG003	Refgen1	3	-	159612740	159615304	717	0	0	0	0	NA	NA	NA	NA	NA
AC211250.4_FG003	Refgen1	6	+	81972377	81973434	912	0	0	0	0	NA	NA	NA	NA	NA
AC211268.3_FG003	Refgen1	9	+	24011591	24014611	2622	0	0	0	0	NA	NA	NA	NA	NA
AC211276.4_FG008	Refgen1	5	+	16303945	16305027	1083	76	71	10.518	9.992	-0.05	0.869111	0.928985	no	hypothetical protein LOC100280421
AC211319.3_FG001	Refgen1	3	-	213792501	213796309	1149	12	5	1.565	0.663	NA	NA	NA	NA	NA
AC211370.4_FG004	Refgen1	6	-	30710811	30711215	195	5	1	3.843	0.782	NA	NA	NA	NA	NA
AC211390.3_FG001	Refgen1	1	-	95897213	95902316	1842	77	86	6.265	7.116	0.2	0.389058	0.529572	no	NA
AC211394.4_FG004	Refgen1	9	+	91308751	91313235	1305	220	344	25.267	40.176	0.69	1.88107e-08	2.32197e-07	no	purple acid phosphatase
AC211401.4_FG003	Refgen1	1	+	270222051	270223283	1233	100	87	12.156	10.754	-0.15	0.5105	0.644181	no	hypothetical protein LOC100193318
AC211401.4_FG004	Refgen1	1	-	270252744	270259704	1602	536	421	50.147	40.053	-0.3	0.00136165	0.00541614	no	NA
AC211403.4_FG005	Refgen1	3	+	47198756	47202456	1068	0	0	0	0	NA	NA	NA	NA	NA
AC211408.2_FG002	Refgen1	1	+	267505350	267507076	570	0	0	0	0	NA	NA	NA	NA	NA
AC211411.4_FG004	Refgen1	5	-	157572065	157573503	1224	0	0	0	0	NA	NA	NA	NA	NA
AC211413.4_FG001	Refgen1	9	-	87827776	87829340	624	2	0	0.48	0	NA	NA	NA	NA	NA
AC211467.4_FG002	Refgen1	1	-	125015271	125015684	414	0	0	0	0	NA	NA	NA	NA	NA
AC211471.3_FG003	Refgen1	7	+	165905295	165919170	1233	0	0	0	0	NA	NA	NA	NA	NA
AC211474.3_FG006	Refgen1	8	+	16790093	16797549	1497	51	53	5.106	5.396	0.1	0.768844	0.854862	no	NA
AC211477.3_FG021	Refgen1	5	+	2291338	2292214	654	0	0	0	0	NA	NA	NA	NA	NA
AC211478.3_FG004	Refgen1	3	+	137728629	137729093	465	6	3	1.934	0.983	NA	NA	NA	NA	NA
AC211503.4_FG005	Refgen1	1	-	251965204	251968185	897	15	8	2.506	1.359	NA	NA	NA	NA	NA
AC211504.4_FG003	Refgen1	7	+	163870571	163873580	1560	0	0	0	0	NA	NA	NA	NA	NA
AC211532.3_FG001	Refgen1	6	+	357137	358406	1074	8	3	1.116	0.426	NA	NA	NA	NA	hypothetical protein LOC100381470
AC211651.4_FG001	Refgen1	7	+	11068677	11074736	1653	0	0	0	0	NA	NA	NA	NA	NA
AC211652.4_FG001	Refgen1	4	+	20263092	20263592	399	18	4	6.761	1.528	NA	NA	NA	NA	hypothetical protein LOC100276375
AC211652.4_FG002	Refgen1	4	-	20270684	20275589	903	22	11	3.652	1.857	NA	NA	NA	NA	hypothetical protein LOC100274561
AC211652.4_FG003	Refgen1	4	-	20312390	20313861	1365	0	0	0	0	NA	NA	NA	NA	hypothetical protein LOC100191620
AC211669.4_FG003	Refgen1	3	+	174306765	174307483	444	0	0	0	0	NA	NA	NA	NA	NA
AC211689.3_FG003	Refgen1	3	-	211456353	211457923	849	109	90	19.242	16.157	-0.23	0.287631	0.422641	no	NA
AC211702.2_FG002	Refgen1	2	+	205725844	205727409	774	0	0	0	0	NA	NA	NA	NA	NA
AC211707.4_FG003	Refgen1	10	+	24446865	24447161	297	0	0	0	0	NA	NA	NA	NA	NA
AC211734.3_FG001	Refgen1	1	-	36030832	36035070	657	8	4	1.825	0.928	NA	NA	NA	NA	NA
AC211737.3_FG012	Refgen1	5	+	192635006	192642717	2115	506	566	35.858	40.787	0.21	0.0186331	0.0483563	no	NA
AC211749.4_FG007	Refgen1	3	+	111155094	111155390	297	0	0	0	0	NA	NA	NA	NA	hypothetical protein LOC100274980
AC211756.4_FG001	Refgen1	2	-	145621664	145622779	1116	0	0	0	0	NA	NA	NA	NA	NA
AC211762.4_FG004	Refgen1	3	-	155586273	155591502	1056	17	21	2.413	3.031	NA	NA	NA	NA	NA
AC211762.4_FG005	Refgen1	3	-	155577232	155582932	1119	22	42	2.947	5.721	0.95	0.00863309	0.0257576	no	NA
AC211785.2_FG004	Refgen1	2	+	122977314	122980286	2622	0	0	0	0	NA	NA	NA	NA	NA
AC211887.3_FG004	Refgen1	1	-	186862202	186862615	414	0	0	0	0	NA	NA	NA	NA	NA
AC211887.3_FG006	Refgen1	1	-	186922431	186923097	315	0	0	0	0	NA	NA	NA	NA	NA
AC211887.3_FG007	Refgen1	1	+	186924198	186924620	423	0	0	0	0	NA	NA	NA	NA	NA
AC211891.4_FG001	Refgen1	2	-	145448726	145452543	1233	0	0	0	0	NA	NA	NA	NA	NA
AC211891.4_FG003	Refgen1	2	-	145463257	145464578	1035	0	0	0	0	NA	NA	NA	NA	NA
AC211892.4_FG002	Refgen1	1	+	293806538	293810296	3246	28	32	1.293	1.503	0.23	0.605906	0.726115	no	Putative uncharacterized protein
AC211933.4_FG001	Refgen1	9	-	97821203	97823713	2511	0	0	0	0	NA	NA	NA	NA	NA
AC211955.4_FG013	Refgen1	2	-	11488617	11490832	735	368	341	75.042	70.711	-0.06	0.573282	0.698796	no	NA
AC211976.4_FG002	Refgen1	2	+	85979651	85982476	2826	0	0	0	0	NA	NA	NA	NA	NA
AC211996.4_FG001	Refgen1	1	+	83413538	83414246	534	0	0	0	0	NA	NA	NA	NA	NA
AC212023.4_FG004	Refgen1	1	+	224157565	224158224	660	31	34	7.04	7.852	0.18	0.622347	0.739933	no	NA
AC212023.4_FG006	Refgen1	1	+	224162811	224165458	1980	3	4	0.227	0.308	NA	NA	NA	NA	NA
AC212040.2_FG002	Refgen1	1	-	168446235	168446888	654	0	0	0	0	NA	NA	NA	NA	NA
AC212068.4_FG005	Refgen1	6	+	145366424	145369150	1152	240	297	31.225	39.294	0.35	0.00498089	0.016173	no	hypothetical protein LOC100273453
AC212112.4_FG002	Refgen1	5	-	205110426	205115894	1734	118	176	10.199	15.47	0.62	0.000284881	0.00140733	no	hypothetical protein LOC100381831
AC212145.4_FG002	Refgen1	3	-	196860698	196863662	825	0	0	0	0	NA	NA	NA	NA	NA
AC212187.4_FG001	Refgen1	0	-	3455891	3456214	324	2	0	0.925	0	NA	NA	NA	NA	NA
AC212190.4_FG010	Refgen1	3	+	145420816	145428215	2019	75	118	5.568	8.908	0.69	0.000902214	0.0037736	no	NA
AC212190.4_FG011	Refgen1	3	+	145414659	145415159	501	36	80	10.77	24.337	1.18	2.33255e-05	0.00015488	yes	NA
AC212216.4_FG003	Refgen1	7	+	147307341	147310136	2796	0	0	0	0	NA	NA	NA	NA	NA
AC212219.3_FG005	Refgen1	1	-	45115960	45122273	1284	75	101	8.755	11.989	0.47	0.0344924	0.0798505	no	hypothetical protein LOC100273620
AC212227.3_FG006	Refgen1	4	+	31001244	31002830	717	1	0	0.209	0	NA	NA	NA	NA	NA
AC212231.3_FG003	Refgen1	1	-	71946821	71948659	864	0	0	0	0	NA	NA	NA	NA	NA
AC212244.4_FG004	Refgen1	1	+	204628112	204629062	951	4	3	0.63	0.481	NA	NA	NA	NA	NA
AC212290.3_FG005	Refgen1	8	-	15785695	15786115	342	3	2	1.315	0.891	NA	NA	NA	NA	NA
AC212323.4_FG005	Refgen1	1	-	179780391	179780807	417	0	0	0	0	NA	NA	NA	NA	NA
AC212323.4_FG010	Refgen1	1	+	179851103	179851618	516	4	2	1.162	0.591	NA	NA	NA	NA	NA
AC212343.3_FG002	Refgen1	4	-	215668466	215669112	354	0	0	0	0	NA	NA	NA	NA	NA
AC212350.3_FG005	Refgen1	3	-	187164294	187166148	1692	1	0	0.089	0	NA	NA	NA	NA	NA
AC212353.4_FG004	Refgen1	9	-	3413014	3414249	1236	43	26	5.214	3.206	-0.66	0.0701716	0.142162	no	hypothetical protein LOC100304207
AC212361.3_FG007	Refgen1	6	+	144583260	144584120	861	3	2	0.522	0.354	NA	NA	NA	NA	NA
AC212361.3_FG010	Refgen1	6	-	144605219	144606199	981	0	0	0	0	NA	NA	NA	NA	NA
AC212369.5_FG008	Refgen1	7	-	143031978	143036132	2160	6	5	0.416	0.353	NA	NA	NA	NA	NA
AC212390.3_FG005	Refgen1	1	+	237635506	237640040	1704	98	155	8.62	13.864	0.7	0.000119697	0.000655548	no	NA
AC212394.4_FG006	Refgen1	6	+	153337222	153337503	282	0	0	0	0	NA	NA	NA	NA	NA
AC212394.4_FG010	Refgen1	6	+	153369513	153374160	1299	0	0	0	0	NA	NA	NA	NA	NA
AC212414.3_FG001	Refgen1	8	-	90276210	90278222	894	216	225	36.212	38.359	0.11	0.446381	0.586221	no	NA
AC212447.3_FG001	Refgen1	2	+	87135060	87138568	1287	0	0	0	0	NA	NA	NA	NA	NA
AC212449.4_FG001	Refgen1	5	+	174103610	174105240	1203	0	0	0	0	NA	NA	NA	NA	NA
AC212449.4_FG002	Refgen1	5	-	174093986	174095017	1032	0	0	0	0	NA	NA	NA	NA	NA
AC212449.4_FG004	Refgen1	5	-	174120315	174121169	855	0	0	0	0	NA	NA	NA	NA	NA
AC212449.4_FG005	Refgen1	5	-	174164475	174166739	1326	35	18	3.956	2.069	-0.87	0.0280894	0.0675908	no	NA
AC212449.4_FG006	Refgen1	5	-	174023146	174024177	1032	0	0	0	0	NA	NA	NA	NA	NA
AC212454.4_FG002	Refgen1	8	-	15291973	15292485	513	0	0	0	0	NA	NA	NA	NA	NA
AC212465.3_FG002	Refgen1	6	-	115460380	115460664	285	0	0	0	0	NA	NA	NA	NA	NA
AC212565.3_FG001	Refgen1	8	-	16208595	16209260	666	96	37	21.604	8.467	-1.3	8.22242e-07	7.58149e-06	yes	Histone H4
AC212567.3_FG003	Refgen1	4	+	206948490	206950301	1812	1	2	0.083	0.168	NA	NA	NA	NA	NA
AC212570.3_FG004	Refgen1	7	-	20553559	20562131	1758	3	0	0.256	0	NA	NA	NA	NA	NA
AC212570.3_FG006	Refgen1	7	-	20667583	20669196	1614	52	61	4.829	5.76	0.27	0.346865	0.487085	no	small nucleolar ribonucleoprotein complex subunit
AC212575.3_FG002	Refgen1	8	-	10773091	10774845	1710	5	3	0.438	0.267	NA	NA	NA	NA	NA
AC212579.3_FG002	Refgen1	5	+	76567662	76568697	477	30	31	9.426	9.905	0.09	0.799672	0.876838	no	NA
AC212582.3_FG006	Refgen1	9	+	102186257	102188931	900	57	34	9.492	5.758	-0.68	0.0273324	0.0661787	no	NA
AC212583.3_FG002	Refgen1	7	+	165473906	165475653	909	13	19	2.143	3.186	NA	NA	NA	NA	NA
AC212667.3_FG005	Refgen1	5	-	200642790	200643911	1122	0	0	0	0	NA	NA	NA	NA	NA
AC212668.2_FG010	Refgen1	7	+	73655059	73667328	654	29	63	6.646	14.682	1.14	0.00022776	0.00116002	no	NA
AC212684.3_FG012	Refgen1	7	-	166655104	166657368	2265	43	19	2.845	1.279	-1.09	0.00340453	0.011851	no	NA
AC212728.3_FG001	Refgen1	5	+	2179669	2180860	519	3	8	0.866	2.349	NA	NA	NA	NA	Putative uncharacterized protein
AC212754.3_FG004	Refgen1	7	-	94964515	94965552	1038	4	2	0.578	0.294	NA	NA	NA	NA	NA
AC212779.3_FG002	Refgen1	2	+	62634418	62636004	1587	0	0	0	0	NA	NA	NA	NA	NA
AC212823.4_FG003	Refgen1	5	+	166736894	166742361	1170	0	0	0	0	NA	NA	NA	NA	NA
AC212827.3_FG003	Refgen1	9	+	96451256	96454283	882	160	75	27.189	12.96	-1.04	9.74702e-08	1.06585e-06	yes	NA
AC212827.3_FG005	Refgen1	9	+	96504359	96507220	849	0	0	0	0	NA	NA	NA	NA	NA
AC212835.3_FG001	Refgen1	2	-	20773438	20775087	1650	3	4	0.273	0.369	NA	NA	NA	NA	NA
AC212835.3_FG002	Refgen1	2	+	20776450	20777213	567	91	55	24.055	14.784	-0.67	0.00613559	0.0193083	no	blue copper protein
AC212835.3_FG003	Refgen1	2	+	20842665	20843517	573	49	42	12.817	11.172	-0.17	0.600886	0.722298	no	NA
AC212835.3_FG004	Refgen1	2	+	20876598	20877059	462	92	64	29.846	21.113	-0.47	0.0451601	0.0999271	no	NA
AC212835.3_FG007	Refgen1	2	+	20925318	20928168	1422	500	519	52.7	55.627	0.1	0.272818	0.406735	no	endonuclease, polyU-specific
AC212835.3_FG008	Refgen1	2	-	20929915	20931626	1380	0	0	0	0	NA	NA	NA	NA	NA
AC212835.3_FG010	Refgen1	2	+	20944284	20950087	1479	0	0	0	0	NA	NA	NA	NA	NA
AC212835.3_FG011	Refgen1	2	-	20954601	20958708	753	37	46	7.365	9.311	0.35	0.273347	0.407305	no	NA
AC212859.3_FG007	Refgen1	2	+	25648929	25661319	5346	96	114	2.691	3.25	0.29	0.14736	0.254371	no	NA
AC212859.3_FG008	Refgen1	2	-	25664066	25665294	987	26	45	3.948	6.949	0.82	0.0175608	0.0460234	no	hypothetical protein LOC100192643
AC212873.3_FG002	Refgen1	7	+	139602656	139604055	465	1473	1161	474.779	380.539	-0.3	1.7182e-07	1.81453e-06	no	NA
AC212873.3_FG006	Refgen1	7	+	139514301	139518948	1065	1	2	0.141	0.286	NA	NA	NA	NA	NA
AC212873.3_FG008	Refgen1	7	+	139572619	139575777	591	710	790	180.058	203.732	0.2	0.00721948	0.0222218	no	NA
AC212886.3_FG006	Refgen1	9	+	30616453	30620812	1074	0	0	0	0	NA	NA	NA	NA	NA
AC212887.3_FG005	Refgen1	6	+	117221370	117222918	1053	1	0	0.142	0	NA	NA	NA	NA	NA
AC212976.3_FG003	Refgen1	1	+	175156991	175157401	411	0	0	0	0	NA	NA	NA	NA	NA
AC212979.2_FG006	Refgen1	1	+	79881021	79885150	1368	0	0	0	0	NA	NA	NA	NA	NA
AC213050.3_FG001	Refgen1	6	+	95029863	95032085	2223	25	36	1.686	2.468	0.56	0.126761	0.226385	no	NA
AC213050.3_FG002	Refgen1	6	+	95168979	95169956	294	5	7	2.549	3.629	NA	NA	NA	NA	hypothetical protein LOC100278675
AC213099.3_FG001	Refgen1	1	-	62995052	62995778	571	52	46	13.649	12.278	-0.13	0.686923	0.791068	no	hypothetical protein LOC100278751
AC213099.3_FG002	Refgen1	1	+	62975348	62978164	1374	38	24	4.145	2.662	-0.59	0.126782	0.226385	no	hypothetical protein LOC100216588
AC213373.3_FG001	Refgen1	9	+	395735	406020	1911	92	125	7.216	9.969	0.49	0.0143773	0.0390888	no	NA
AC213395.3_FG007	Refgen1	5	-	56162487	56163713	420	0	0	0	0	NA	NA	NA	NA	NA
AC213398.3_FG004	Refgen1	3	+	134543408	134546239	714	1	0	0.21	0	NA	NA	NA	NA	NA
AC213398.3_FG005	Refgen1	3	-	134547007	134548179	1173	0	0	0	0	NA	NA	NA	NA	NA
AC213398.3_FG007	Refgen1	3	+	134577360	134579646	720	0	0	0	0	NA	NA	NA	NA	NA
AC213431.4_FG005	Refgen1	7	-	40828849	40831320	2472	2	0	0.121	0	NA	NA	NA	NA	NA
AC213432.2_FG004	Refgen1	4	+	185336346	185336903	558	0	0	0	0	NA	NA	NA	NA	PME/invertase inhibitor-like protein
AC213455.3_FG008	Refgen1	7	-	152464715	152466528	948	0	1	0	0.161	NA	NA	NA	NA	NA
AC213463.3_FG002	Refgen1	5	-	13107593	13114182	1269	61	64	7.205	7.687	0.12	0.655975	0.766904	no	hypothetical protein LOC100191143
AC213463.3_FG003	Refgen1	5	+	13100404	13101034	534	160	86	44.908	24.546	-0.84	7.2933e-06	5.52109e-05	yes	NA
AC213463.3_FG007	Refgen1	5	+	12969340	12972512	624	76	80	18.255	19.54	0.12	0.631248	0.747439	no	hypothetical protein LOC100276944
AC213463.3_FG009	Refgen1	5	+	12995948	13000667	1899	3	0	0.237	0	NA	NA	NA	NA	NA
AC213464.3_FG012	Refgen1	6	+	169038503	169039483	816	457	218	83.94	40.718	-1.02	7.98174e-19	2.72454e-17	yes	NA
AC213521.3_FG003	Refgen1	1	+	225523002	225524429	831	41	38	7.395	6.97	-0.06	0.910556	0.954139	no	NA
AC213521.3_FG004	Refgen1	1	+	225559629	225567791	1554	1184	879	114.194	86.21	-0.38	2.29219e-09	3.2272e-08	no	NA
AC213521.3_FG005	Refgen1	1	+	225605216	225607744	1467	570	639	58.235	66.388	0.21	0.0113339	0.0321905	no	hypothetical protein LOC100193466
AC213524.3_FG003	Refgen1	1	-	193381580	193383072	831	0	0	0	0	NA	NA	NA	NA	NA
AC213600.3_FG002	Refgen1	3	-	43944039	43948032	1059	26	22	3.68	3.166	-0.18	0.667497	0.775586	no	hypothetical protein LOC100279534
AC213600.3_FG004	Refgen1	3	-	43982196	43982465	270	0	0	0	0	NA	NA	NA	NA	NA
AC213608.3_FG003	Refgen1	4	+	56458504	56460129	1464	0	0	0	0	NA	NA	NA	NA	NA
AC213612.3_FG001	Refgen1	9	+	43511608	43512258	456	338	253	111.095	84.562	-0.37	0.00201375	0.0075707	no	glycine-rich cell wall structural protein
AC213612.3_FG002	Refgen1	9	+	43492807	43510375	699	34	34	7.29	7.413	0.05	0.904111	0.950555	no	NA
AC213621.5_FG002	Refgen1	6	+	151736529	151737041	513	0	0	0	0	NA	NA	NA	NA	NA
AC213621.5_FG004	Refgen1	6	+	151746294	151747586	1293	43	9	4.984	1.061	-2.09	2.35557e-06	1.97887e-05	yes	NA
AC213621.5_FG005	Refgen1	6	+	151804672	151806169	426	593	490	208.635	175.31	-0.23	0.00977072	0.0284862	no	NA
AC213642.3_FG003	Refgen1	10	-	49137206	49138267	363	17	11	7.019	4.619	NA	NA	NA	NA	NA
AC213654.3_FG001	Refgen1	3	+	186178394	186179371	978	238	317	36.474	49.401	0.46	0.000183909	0.000959472	no	hypothetical protein LOC100194242
AC213654.3_FG002	Refgen1	3	+	186181994	186186954	1203	519	473	64.661	59.926	-0.09	0.35712	0.497974	no	NA
AC213654.3_FG003	Refgen1	3	-	186207074	186207616	543	22	8	6.072	2.245	NA	NA	NA	NA	hypothetical protein LOC100278035
AC213654.3_FG004	Refgen1	3	+	186211316	186212404	1089	0	0	0	0	NA	NA	NA	NA	NA
AC213654.3_FG005	Refgen1	3	+	186281515	186284725	549	14	13	3.822	3.609	NA	NA	NA	NA	hypothetical protein LOC100278457
AC213654.3_FG006	Refgen1	3	-	186277329	186280301	774	1	2	0.194	0.394	NA	NA	NA	NA	NA
AC213666.3_FG003	Refgen1	4	+	23966832	23967323	492	0	0	0	0	NA	NA	NA	NA	NA
AC213670.4_FG004	Refgen1	1	+	184809070	184809597	528	1	0	0.284	0	NA	NA	NA	NA	NA
AC213769.3_FG001	Refgen1	3	+	200434462	200436030	1569	0	0	0	0	NA	NA	NA	NA	NA
AC213851.3_FG002	Refgen1	8	+	79319606	79321211	657	0	0	0	0	NA	NA	NA	NA	NA
AC213857.4_FG003	Refgen1	1	-	187203407	187203739	333	7	5	3.151	2.288	NA	NA	NA	NA	NA
AC213884.3_FG001	Refgen1	6	-	140772734	140776131	558	119	103	31.963	28.133	-0.16	0.421035	0.561984	no	ran-binding protein 1
AC213884.3_FG002	Refgen1	6	-	140674404	140675513	1110	4	1	0.54	0.137	NA	NA	NA	NA	NA
AC213890.4_FG004	Refgen1	1	+	251688887	251690474	888	0	0	0	0	NA	NA	NA	NA	NA
AC213896.2_FG005	Refgen1	9	-	9321654	9323691	573	0	0	0	0	NA	NA	NA	NA	NA
AC214040.3_FG009	Refgen1	1	+	36198328	36200312	1695	6	12	0.531	1.079	NA	NA	NA	NA	NA
AC214046.4_FG005	Refgen1	10	+	148507721	148508344	624	2	0	0.48	0	NA	NA	NA	NA	NA
AC214119.3_FG009	Refgen1	7	+	9420883	9423310	1416	12	7	1.27	0.753	NA	NA	NA	NA	hypothetical protein LOC100217039
AC214132.2_FG008	Refgen1	9	-	5347086	5351376	564	0	0	0	0	NA	NA	NA	NA	NA
AC214144.3_FG002	Refgen1	7	-	45331087	45333414	2328	0	0	0	0	NA	NA	NA	NA	NA
AC214147.3_FG005	Refgen1	4	-	207930333	207930965	633	0	0	0	0	NA	NA	NA	NA	NA
AC214168.3_FG001	Refgen1	2	+	55638547	55642535	1041	0	1	0	0.146	NA	NA	NA	NA	NA
AC214227.4_FG013	Refgen1	3	-	150731609	150732439	831	0	0	0	0	NA	NA	NA	NA	NA
AC214244.4_FG002	Refgen1	5	+	95679178	95681614	657	115	157	26.235	36.421	0.49	0.0052102	0.0167829	no	NA
AC214266.3_FG002	Refgen1	10	+	51704817	51707246	966	3	12	0.465	1.893	NA	NA	NA	NA	UDP-galactose translocator
AC214267.3_FG010	Refgen1	1	-	238709044	238711714	2118	2	1	0.142	0.072	NA	NA	NA	NA	NA
AC214350.3_FG007	Refgen1	5	+	165805384	165808348	819	441	468	80.704	87.093	0.13	0.173762	0.288757	no	hypothetical protein LOC100192468
AC214352.2_FG012	Refgen1	8	-	172391214	172394735	1170	0	0	0	0	NA	NA	NA	NA	NA
AC214353.3_FG003	Refgen1	3	-	92721958	92722600	459	0	0	0	0	NA	NA	NA	NA	NA
AC214359.3_FG003	Refgen1	3	-	85552779	85556176	2682	0	0	0	0	NA	NA	NA	NA	NA
AC214360.3_FG001	Refgen1	3	+	85049846	85053254	2358	21	3	1.335	0.194	NA	NA	NA	NA	hypothetical protein LOC100279558
AC214360.3_FG006	Refgen1	3	+	84997215	85001542	939	34	54	5.427	8.765	0.7	0.0248724	0.0612148	no	NA
AC214360.3_FG007	Refgen1	3	+	84989855	84991673	624	28	15	6.725	3.664	-0.81	0.0675488	0.138069	no	NA
AC214363.3_FG002	Refgen1	5	+	204253164	204258177	3456	0	0	0	0	NA	NA	NA	NA	NA
AC214429.2_FG002	Refgen1	4	-	210241379	210241897	519	0	0	0	0	NA	NA	NA	NA	NA
AC214432.4_FG005	Refgen1	4	-	239498893	239499955	777	7	10	1.35	1.962	NA	NA	NA	NA	NA
AC214433.3_FG002	Refgen1	5	+	4979473	4982769	843	16	14	2.845	2.531	NA	NA	NA	NA	NA
AC214437.4_FG004	Refgen1	5	+	134063662	134065029	432	78	90	27.062	31.753	0.25	0.280061	0.414503	no	NA
AC214446.3_FG002	Refgen1	10	+	7643070	7646365	1167	94	133	12.073	17.37	0.54	0.00519846	0.0167597	no	NA
AC214448.3_FG007	Refgen1	3	+	180042578	180043930	1353	402	401	44.532	45.172	0.04	0.672057	0.779326	no	hypothetical protein LOC100272830
AC214478.4_FG010	Refgen1	6	-	92074681	92076027	909	0	0	0	0	NA	NA	NA	NA	NA
AC214479.2_FG001	Refgen1	5	+	216428436	216431477	1953	359	485	27.551	37.849	0.48	1.62178e-06	1.40549e-05	no	NA
AC214507.3_FG001	Refgen1	10	-	125599703	125601054	1017	132	120	19.453	17.984	-0.09	0.659296	0.769316	no	LOC732768
AC214508.3_FG003	Refgen1	4	-	218831019	218831750	732	0	0	0	0	NA	NA	NA	NA	NA
AC214524.3_FG002	Refgen1	1	-	76772661	76774711	1593	0	0	0	0	NA	NA	NA	NA	NA
AC214531.3_FG004	Refgen1	4	-	75968054	75971724	1500	5	0	0.5	0	NA	NA	NA	NA	NA
AC214534.3_FG010	Refgen1	3	+	161374531	161376135	1605	7	19	0.654	1.804	NA	NA	NA	NA	NA
AC214602.3_FG012	Refgen1	2	-	229487316	229489868	2553	39	36	2.29	2.149	-0.07	0.908199	0.953161	no	NA
AC214635.3_FG002	Refgen1	4	+	123174214	123175584	1371	61	57	6.669	6.337	-0.05	0.854551	0.917526	no	LOC100281539
AC214635.3_FG005	Refgen1	4	-	123289696	123293131	564	0	0	0	0	NA	NA	NA	NA	NA
AC214635.3_FG006	Refgen1	4	-	123294183	123294440	258	6	2	3.486	1.181	NA	NA	NA	NA	Putative uncharacterized protein
AC214640.3_FG004	Refgen1	7	-	139883557	139884843	1071	76	76	10.636	10.815	0.05	0.871284	0.930712	no	NA
AC214641.2_FG002	Refgen1	4	+	244562538	244564143	1020	0	0	0	0	NA	NA	NA	NA	NA
AC214648.3_FG001	Refgen1	8	+	130589863	130591398	1536	0	0	0	0	NA	NA	NA	NA	NA
AC214648.3_FG003	Refgen1	8	-	130485936	130489881	1062	258	210	36.411	30.138	-0.25	0.0644288	0.133074	no	senescence-associated protein
AC214648.3_FG005	Refgen1	8	+	130468957	130469749	639	0	0	0	0	NA	NA	NA	NA	NA
AC214743.3_FG001	Refgen1	3	-	167879073	167879783	711	0	0	0	0	NA	NA	NA	NA	NA
AC214743.3_FG002	Refgen1	3	+	167899604	167900551	786	0	0	0	0	NA	NA	NA	NA	NA
AC214744.3_FG004	Refgen1	3	-	146464545	146464949	405	0	0	0	0	NA	NA	NA	NA	NA
AC214765.3_FG001	Refgen1	6	+	119554497	119554820	324	0	0	0	0	NA	NA	NA	NA	NA
AC214771.3_FG002	Refgen1	5	-	140531815	140532447	633	0	0	0	0	NA	NA	NA	NA	NA
AC214777.4_FG003	Refgen1	5	+	163926654	163927132	291	17	9	8.756	4.714	NA	NA	NA	NA	NA
AC214791.2_FG002	Refgen1	10	-	45542424	45542867	267	1	0	0.561	0	NA	NA	NA	NA	ZCN20
AC214817.3_FG004	Refgen1	6	-	154469739	154472655	1905	118	230	9.284	18.401	1	2.44399e-10	3.94197e-09	yes	NA
AC215181.3_FG004	Refgen1	5	+	10451985	10452965	981	1	0	0.153	0	NA	NA	NA	NA	NA
AC215198.3_FG002	Refgen1	9	+	12602132	12604495	2364	16	32	1.014	2.063	1	0.0199936	0.0512118	no	NA
AC215201.3_FG005	Refgen1	6	-	142282680	142286751	1782	4999	5510	420.452	471.263	0.19	2.7606e-11	5.06332e-10	no	Putative uncharacterized protein
AC215201.3_FG008	Refgen1	6	+	142271147	142272271	507	2	2	0.591	0.601	NA	NA	NA	NA	Putative uncharacterized protein
AC215232.3_FG004	Refgen1	8	-	150603946	150604887	942	18	10	2.864	1.618	NA	NA	NA	NA	NA
AC215256.3_FG002	Refgen1	6	+	22681595	22684844	888	40	51	6.751	8.753	0.39	0.208739	0.332194	no	NA
AC215260.3_FG001	Refgen1	3	+	16868015	16868542	528	613	522	174.008	150.68	-0.18	0.0325359	0.0761539	no	LOC100285709
AC215260.3_FG003	Refgen1	3	+	16772460	16773344	885	112	123	18.968	21.183	0.18	0.361085	0.501871	no	NA
AC215260.3_FG004	Refgen1	3	-	16807295	16807801	507	187	192	55.281	57.718	0.09	0.572356	0.698215	no	regulator of ribonuclease activity A
AC215264.2_FG005	Refgen1	9	+	95535690	95537120	1122	356	193	47.555	26.217	-0.83	3.75977e-11	6.79847e-10	yes	NA
AC215290.3_FG002	Refgen1	2	-	39492440	39493894	1455	0	0	0	0	NA	NA	NA	NA	NA
AC215309.3_FG001	Refgen1	1	-	202692510	202695645	981	1	1	0.153	0.155	NA	NA	NA	NA	NA
AC215309.3_FG004	Refgen1	1	-	202782039	202785892	1197	19	50	2.379	6.366	1.4	9.77487e-05	0.000548455	yes	NA
AC215313.3_FG003	Refgen1	10	-	9128705	9130346	798	3	2	0.563	0.382	NA	NA	NA	NA	NA
AC215605.2_FG007	Refgen1	9	+	8136271	8138789	2286	4	0	0.262	0	NA	NA	NA	NA	NA
AC215639.3_FG002	Refgen1	10	-	36402116	36406008	1116	1	0	0.134	0	NA	NA	NA	NA	NA
AC215678.3_FG008	Refgen1	2	+	10651755	10653027	450	0	0	0	0	NA	NA	NA	NA	NA
AC215690.3_FG002	Refgen1	10	+	106616770	106620167	1179	123	140	15.636	18.098	0.23	0.195585	0.316523	no	acyl-desaturase
AC215811.3_FG003	Refgen1	5	+	67713726	67717998	915	0	0	0	0	NA	NA	NA	NA	NA
AC215858.2_FG002	Refgen1	6	-	141667892	141668156	219	11	11	7.528	7.655	NA	NA	NA	NA	NA
AC215871.3_FG002	Refgen1	7	-	62066142	62070203	786	0	0	0	0	NA	NA	NA	NA	NA
AC215874.3_FG003	Refgen1	10	-	71184749	71186994	459	3	0	0.98	0	NA	NA	NA	NA	NA
AC215909.3_FG001	Refgen1	5	+	62244730	62246463	1509	0	0	0	0	NA	NA	NA	NA	NA
AC215914.3_FG004	Refgen1	3	-	220482488	220484818	1194	33	26	4.142	3.319	-0.29	0.438634	0.578722	no	NA
AC215994.3_FG003	Refgen1	2	-	10302889	10306621	1143	0	0	0	0	NA	NA	NA	NA	NA
AC216010.3_FG001	Refgen1	3	+	135257156	135264483	1332	25	19	2.813	2.174	-0.33	0.454062	0.592684	no	Pseudouridylate synthase (EC 5.4.99.-)
AC216067.3_FG002	Refgen1	4	-	209983562	209985559	498	533	525	160.413	160.675	0.03	0.782035	0.864186	no	V-type proton ATPase 16 kDa proteolipid subunit Fragment (V-ATPase 16 kDa proteolipid subunit)(Vacuolar proton pump 16 kDa proteolipid subunit)
AC216203.3_FG003	Refgen1	4	+	183506834	183508596	1215	1	0	0.123	0	NA	NA	NA	NA	NA
AC216229.3_FG002	Refgen1	10	+	127635224	127636164	711	0	0	0	0	NA	NA	NA	NA	NA
AC216235.2_FG010	Refgen1	4	-	13587801	13589069	1269	0	0	0	0	NA	NA	NA	NA	NA
AC216247.3_FG001	Refgen1	1	-	63557750	63560253	903	0	0	0	0	NA	NA	NA	NA	NA
AC216247.3_FG003	Refgen1	1	+	63519820	63522521	1182	9	14	1.141	1.805	NA	NA	NA	NA	NA
AC216256.3_FG006	Refgen1	9	+	73749703	73750266	564	17	18	4.518	4.864	NA	NA	NA	NA	NA
AC216264.3_FG001	Refgen1	5	-	45183313	45186222	1272	1	3	0.118	0.359	NA	NA	NA	NA	NA
AC216357.3_FG001	Refgen1	7	+	29196382	29196720	339	16	3	7.074	1.349	NA	NA	NA	NA	NA
AC216369.3_FG002	Refgen1	10	-	77925162	77929141	2490	2	2	0.12	0.122	NA	NA	NA	NA	NA
AC216705.3_FG002	Refgen1	2	-	127773133	127773573	441	0	0	0	0	NA	NA	NA	NA	NA
AC216722.2_FG003	Refgen1	6	-	13582731	13585037	540	0	0	0	0	NA	NA	NA	NA	NA
AC216731.3_FG001	Refgen1	5	+	201012621	201013822	888	0	0	0	0	NA	NA	NA	NA	NA
AC216731.3_FG002	Refgen1	5	+	201015503	201018102	2484	0	0	0	0	NA	NA	NA	NA	hypothetical protein LOC100272337
AC216793.3_FG008	Refgen1	8	+	149750013	149751170	1158	1	0	0.129	0	NA	NA	NA	NA	NA
AC216801.3_FG003	Refgen1	5	+	179393007	179397473	1446	0	0	0	0	NA	NA	NA	NA	NA
AC216828.3_FG007	Refgen1	4	+	181353648	181354208	384	16	16	6.245	6.351	NA	NA	NA	NA	NA
AC216855.2_FG002	Refgen1	3	+	153992359	153995507	1401	12	17	1.284	1.849	NA	NA	NA	NA	NA
AC216870.3_FG005	Refgen1	6	-	105525780	105527548	1380	17	20	1.846	2.209	NA	NA	NA	NA	NA
AC216871.3_FG001	Refgen1	8	-	10081130	10084550	1356	0	0	0	0	NA	NA	NA	NA	NA
AC216871.3_FG003	Refgen1	8	-	10116607	10119140	1296	114	33	13.184	3.881	-1.71	4.15702e-11	7.44435e-10	yes	NA
AC216871.3_FG004	Refgen1	8	-	10128480	10130103	1431	75	57	7.855	6.071	-0.34	0.191485	0.31098	no	hypothetical protein LOC100274284 (LOC100274284), mRNA
AC216886.3_FG001	Refgen1	9	+	33750210	33751463	1254	0	0	0	0	NA	NA	NA	NA	NA
AC216886.3_FG002	Refgen1	9	-	33729471	33730910	1323	1	0	0.113	0	NA	NA	NA	NA	hypothetical protein LOC100381960
AC216886.3_FG003	Refgen1	9	-	33687475	33688662	1188	0	0	0	0	NA	NA	NA	NA	NA
AC217050.4_FG001	Refgen1	1	+	214247189	214251525	1410	223	209	23.704	22.592	-0.05	0.772838	0.857425	no	NA
AC217050.4_FG004	Refgen1	1	-	214180910	214187052	2667	109	134	6.126	7.658	0.34	0.0722031	0.145643	no	NA
AC217050.4_FG006	Refgen1	1	-	214304837	214306592	771	370	559	71.926	110.504	0.64	2.26649e-11	4.20281e-10	no	14-3-3-like protein
AC217050.4_FG007	Refgen1	1	-	214291546	214293776	1536	260	415	25.37	41.179	0.72	1.73288e-10	2.87541e-09	no	LOC542156
AC217051.3_FG002	Refgen1	10	+	113723181	113724924	1380	68	38	7.385	4.197	-0.78	0.00638532	0.0199777	no	NA
AC217051.3_FG005	Refgen1	10	+	113780054	113780371	318	0	0	0	0	NA	NA	NA	NA	hypothetical protein LOC100276735
AC217051.3_FG006	Refgen1	10	-	113828938	113830021	522	0	0	0	0	NA	NA	NA	NA	ZCN5 protein
AC217121.3_FG006	Refgen1	4	+	86380964	86418483	3252	170	207	7.835	9.702	0.33	0.0267722	0.0650063	no	NA
AC217121.3_FG007	Refgen1	4	-	86419323	86421686	2364	38	32	2.409	2.063	-0.19	0.632923	0.748728	no	hypothetical protein LOC100381425
AC217123.2_FG004	Refgen1	6	-	89447808	89451908	1857	87	80	7.022	6.566	-0.07	0.75739	0.84732	no	NA
AC217263.3_FG007	Refgen1	3	+	173874480	173878091	954	0	0	0	0	NA	NA	NA	NA	NA
AC217264.3_FG001	Refgen1	1	+	245054686	245060437	963	0	0	0	0	NA	NA	NA	NA	NA
AC217264.3_FG002	Refgen1	1	-	245154295	245159447	1821	0	0	0	0	NA	NA	NA	NA	NA
AC217264.3_FG005	Refgen1	1	+	245136067	245138533	1365	1	2	0.11	0.223	NA	NA	NA	NA	NA
AC217271.3_FG001	Refgen1	4	+	193406834	193409099	405	11	25	4.071	9.408	NA	NA	NA	NA	hypothetical protein LOC100276056
AC217271.3_FG002	Refgen1	4	-	193411651	193415471	1491	127	104	12.766	10.631	-0.24	0.211725	0.335669	no	NA
AC217274.3_FG006	Refgen1	4	-	244373300	244374010	459	30	24	9.796	7.969	-0.26	0.499744	0.63491	no	NA
AC217283.2_FG004	Refgen1	2	-	5348817	5349398	582	0	0	0	0	NA	NA	NA	NA	NA
AC217293.3_FG005	Refgen1	2	-	228677158	228679074	1734	5	0	0.432	0	NA	NA	NA	NA	NA
AC217293.3_FG007	Refgen1	2	-	228698303	228704518	2196	979	1074	66.818	74.54	0.18	0.00470896	0.0154617	no	hypothetical protein LOC100304375
AC217300.3_FG004	Refgen1	1	-	43555992	43561665	1287	0	0	0	0	NA	NA	NA	NA	NA
AC217300.3_FG005	Refgen1	1	+	43587722	43588390	669	1201	843	269.066	192.053	-0.46	6.83098e-13	1.48576e-11	no	hypothetical protein LOC100274533
AC217358.3_FG003	Refgen1	1	-	295783887	295787649	1545	34	42	3.298	4.143	0.34	0.30356	0.440971	no	hypothetical protein LOC100279605
AC217358.3_FG004	Refgen1	1	+	295774746	295782312	2334	102	117	6.55	7.64	0.24	0.223881	0.350622	no	NA
AC217358.3_FG005	Refgen1	1	-	295770883	295773161	870	89	137	15.332	24.001	0.66	0.000660554	0.00290901	no	prohibitin4
AC217358.3_FG007	Refgen1	1	-	295840694	295841692	780	0	0	0	0	NA	NA	NA	NA	hypothetical protein LOC100279063
AC217358.3_FG008	Refgen1	1	-	295848751	295849523	705	1	0	0.213	0	NA	NA	NA	NA	NA
AC217358.3_FG009	Refgen1	1	-	295851007	295851837	705	1	1	0.213	0.216	NA	NA	NA	NA	NA
AC217358.3_FG010	Refgen1	1	+	295865315	295871210	975	17	43	2.613	6.722	1.34	0.000653509	0.00288406	no	hypothetical protein LOC100217107
AC217358.3_FG011	Refgen1	1	-	295871903	295876245	990	114	175	17.259	26.942	0.66	0.000123706	0.000674417	no	LOC100286182
AC217358.3_FG012	Refgen1	1	+	295826240	295828850	747	52	52	10.433	10.61	0.05	0.921967	0.961158	no	NA
AC217358.3_FG013	Refgen1	1	-	295835963	295837786	690	0	0	0	0	NA	NA	NA	NA	NA
AC217374.3_FG001	Refgen1	1	+	296346966	296347346	381	0	0	0	0	NA	NA	NA	NA	hypothetical protein LOC100272462
AC217374.3_FG006	Refgen1	1	-	296313073	296316488	963	0	0	0	0	NA	NA	NA	NA	NA
AC217401.3_FG001	Refgen1	1	-	263955828	263958836	1521	125	140	12.317	14.029	0.21	0.243397	0.371889	no	LOC100285372
AC217401.3_FG002	Refgen1	1	-	263960570	263969067	1689	134	187	11.891	16.875	0.53	0.00118414	0.00478835	no	LOC100284659
AC217401.3_FG003	Refgen1	1	-	263970156	263974309	1932	301	343	23.351	27.059	0.24	0.0403703	0.0909529	no	Putative uncharacterized protein
AC217415.3_FG001	Refgen1	2	+	227024310	227025113	804	0	0	0	0	NA	NA	NA	NA	NA
AC217415.3_FG004	Refgen1	2	+	226955001	226955522	522	0	0	0	0	NA	NA	NA	NA	NA
AC217499.3_FG001	Refgen1	3	+	219582031	219586745	1122	153	263	20.438	35.726	0.82	1.03953e-08	1.3416e-07	yes	hypothetical protein LOC100191271
AC217499.3_FG002	Refgen1	3	+	219587844	219588263	420	0	0	0	0	NA	NA	NA	NA	NA
AC217499.3_FG003	Refgen1	3	-	219609044	219612701	1764	1082	745	91.933	64.369	-0.49	6.03288e-13	1.31903e-11	no	NA
AC217550.3_FG006	Refgen1	5	-	15612047	15612564	474	0	0	0	0	NA	NA	NA	NA	NA
AC217554.3_FG001	Refgen1	2	+	198038107	198040944	2838	1	5	0.053	0.269	NA	NA	NA	NA	NA
AC217556.3_FG003	Refgen1	5	-	37241399	37246892	1380	130	184	14.119	20.322	0.55	0.000853775	0.00361007	no	NA
AC217653.3_FG004	Refgen1	1	+	146977568	146979711	405	10	14	3.701	5.269	NA	NA	NA	NA	NA
AC217665.3_FG005	Refgen1	4	+	116216963	116219105	996	208	337	31.3	51.569	0.74	3.64045e-09	4.99099e-08	no	hypothetical protein LOC100193122
AC217669.3_FG003	Refgen1	1	-	202142602	202143522	411	0	0	0	0	NA	NA	NA	NA	NA
AC217679.3_FG004	Refgen1	4	+	81766524	81768434	894	216	195	36.212	33.244	-0.1	0.490113	0.626054	no	NA
AC217792.3_FG005	Refgen1	7	-	126466912	126468699	1788	23	24	1.928	2.046	0.11	0.884273	0.939189	no	NA
AC217811.3_FG003	Refgen1	4	+	111425250	111427214	1221	78	56	9.575	6.99	-0.42	0.100368	0.18874	no	NA
AC217814.2_FG001	Refgen1	2	-	227028806	227029324	519	0	1	0	0.294	NA	NA	NA	NA	NA
AC217814.2_FG019	Refgen1	2	+	227160191	227160961	771	0	0	0	0	NA	NA	NA	NA	NA
AC217823.3_FG002	Refgen1	5	-	69953873	69957481	717	0	0	0	0	NA	NA	NA	NA	NA
AC217840.3_FG001	Refgen1	5	+	162299931	162300862	687	0	0	0	0	NA	NA	NA	NA	hypothetical protein LOC100275206
AC217842.3_FG001	Refgen1	2	+	152999978	153004607	1719	138	231	12.032	20.481	0.79	2.8667e-07	2.9042e-06	no	Putative uncharacterized protein
AC217887.3_FG001	Refgen1	9	-	117694585	117695535	951	0	0	0	0	NA	NA	NA	NA	NA
AC217887.3_FG003	Refgen1	9	-	117714592	117715038	447	4	3	1.341	1.023	NA	NA	NA	NA	NA
AC217887.3_FG004	Refgen1	9	-	117588700	117590208	1509	35	22	3.476	2.222	-0.6	0.11389	0.20812	no	glucan endo-1,3-beta-glucosidase 5
AC217887.3_FG005	Refgen1	9	-	117591163	117594404	1914	85	76	6.656	6.052	-0.11	0.636844	0.752205	no	pre-mRNA-splicing factor PRP17
AC217896.2_FG001	Refgen1	7	+	104464527	104465669	585	0	0	0	0	NA	NA	NA	NA	NA
AC217897.3_FG010	Refgen1	1	+	38606909	38607316	408	15	2	5.51	0.747	NA	NA	NA	NA	hypothetical protein LOC100277295
AC217908.2_FG003	Refgen1	1	+	208944690	208948356	1215	34	63	4.194	7.903	0.92	0.00217201	0.0080929	no	NA
AC217910.3_FG001	Refgen1	1	-	216726843	216727127	285	34	11	17.88	5.883	-1.5	0.00088248	0.00370677	no	metal ion binding protein
AC217910.3_FG003	Refgen1	1	-	216740397	216741013	219	16	3	10.95	2.088	NA	NA	NA	NA	NA
AC217910.3_FG004	Refgen1	1	+	216692102	216692884	783	6	2	1.148	0.389	NA	NA	NA	NA	hypothetical protein LOC100276545
AC217910.3_FG006	Refgen1	1	+	216686009	216687268	1260	0	0	0	0	NA	NA	NA	NA	hypothetical protein LOC100276588 (LOC100276588), mRNA
AC217941.2_FG002	Refgen1	1	-	154980560	154982515	918	0	0	0	0	NA	NA	NA	NA	NA
AC217950.3_FG001	Refgen1	1	+	229707949	229711483	1554	170	193	16.396	18.929	0.23	0.141501	0.246561	no	NA
AC217962.3_FG005	Refgen1	7	+	133660959	133669646	2124	83	106	5.857	7.606	0.4	0.0588207	0.123566	no	hypothetical protein LOC100381477
AC217965.2_FG012	Refgen1	8	-	15153186	15153977	792	96	45	18.167	8.66	-1.03	4.4967e-05	0.000278047	yes	thylakoid assembly8
AC217966.3_FG007	Refgen1	7	+	4091899	4095087	1044	3	2	0.431	0.292	NA	NA	NA	NA	NA
AC217975.3_FG001	Refgen1	7	-	162876705	162880725	1293	239	187	27.704	22.043	-0.31	0.0292743	0.069909	no	pyruvate dehydrogenase kinase isoform 2
AC217977.3_FG001	Refgen1	1	-	219919276	219920013	738	3	1	0.609	0.207	NA	NA	NA	NA	NA
AC217977.3_FG003	Refgen1	1	+	219900802	219902165	465	40	28	12.893	9.178	-0.45	0.224981	0.351423	no	protein aq_1857
AC217977.3_FG004	Refgen1	1	-	219992906	219995989	525	835	597	238.379	173.314	-0.44	1.45907e-08	1.84045e-07	no	NA
AC217978.3_FG001	Refgen1	10	-	142671364	142671765	402	0	0	0	0	NA	NA	NA	NA	NA
AC218002.3_FG001	Refgen1	6	-	48118646	48119545	900	0	0	0	0	NA	NA	NA	NA	NA
AC218148.2_FG008	Refgen1	6	+	159500776	159502776	2001	150	93	11.235	7.084	-0.64	0.000657404	0.00289972	no	hypothetical protein LOC100279827
AC218457.2_FG013	Refgen1	8	+	15642363	15648738	3057	248	308	12.159	15.356	0.36	0.00341353	0.0118725	no	NA
AC218900.3_FG001	Refgen1	1	+	199722968	199723951	984	16	10	2.437	1.549	NA	NA	NA	NA	gibberellin receptor GID1L2
AC218932.3_FG009	Refgen1	10	-	4645389	4646426	1038	0	0	0	0	NA	NA	NA	NA	NA
AC218957.3_FG003	Refgen1	8	-	19857505	19858942	528	0	0	0	0	NA	NA	NA	NA	NA
AC218972.3_FG001	Refgen1	8	+	169319888	169340216	2598	125	171	7.211	10.032	0.5	0.00358416	0.0123376	no	NA
AC218972.3_FG002	Refgen1	8	-	169342173	169343661	1368	2	0	0.219	0	NA	NA	NA	NA	hypothetical protein LOC100384715
AC218972.3_FG004	Refgen1	8	-	169360872	169363688	1914	136	145	10.65	11.546	0.14	0.438142	0.578248	no	hypothetical protein LOC100191484
AC218972.3_FG005	Refgen1	8	-	169416234	169422523	1392	7	0	0.754	0	NA	NA	NA	NA	NA
AC218972.3_FG007	Refgen1	8	-	169460275	169462950	729	1	2	0.206	0.418	NA	NA	NA	NA	NA
AC218973.3_FG003	Refgen1	3	+	101337246	101338073	828	0	0	0	0	NA	NA	NA	NA	NA
AC218988.3_FG003	Refgen1	9	+	139374717	139375894	873	0	0	0	0	NA	NA	NA	NA	NA
AC218998.2_FG001	Refgen1	4	-	6033189	6034778	1509	17	19	1.689	1.919	NA	NA	NA	NA	hypothetical protein LOC100384011
AC218998.2_FG003	Refgen1	4	-	6101335	6102384	1050	10	10	1.427	1.452	NA	NA	NA	NA	NA
AC218998.2_FG004	Refgen1	4	+	6094234	6098094	1746	64	78	5.494	6.809	0.33	0.179788	0.296503	no	NA
AC218998.2_FG007	Refgen1	4	+	6062869	6066730	1905	408	389	32.1	31.122	-0.02	0.859414	0.921446	no	NA
AC218998.2_FG011	Refgen1	4	+	6006652	6010404	2337	1	0	0.064	0	NA	NA	NA	NA	NA
AC219002.2_FG004	Refgen1	10	+	115517178	115518278	1101	0	0	0	0	NA	NA	NA	NA	NA
AC219006.2_FG006	Refgen1	8	-	130678392	130679682	1020	11	4	1.616	0.598	NA	NA	NA	NA	LOC100286283
AC219006.2_FG007	Refgen1	8	-	130666319	130676426	1173	1	5	0.128	0.65	NA	NA	NA	NA	hypothetical protein LOC100193464
AC219020.4_FG002	Refgen1	6	+	105906015	105908311	1665	14	7	1.26	0.641	NA	NA	NA	NA	NA
AC219043.3_FG003	Refgen1	3	+	16934259	16934669	411	1	0	0.365	0	NA	NA	NA	NA	NA
AC219056.2_FG004	Refgen1	2	-	198275002	198276370	1332	2	8	0.225	0.915	NA	NA	NA	NA	NA
AC219061.2_FG007	Refgen1	10	-	126915505	126917505	2001	74	78	5.543	5.941	0.12	0.626869	0.743671	no	hypothetical protein LOC100274892
AC219079.3_FG005	Refgen1	3	+	110738529	110739293	765	0	0	0	0	NA	NA	NA	NA	NA
AC219159.3_FG002	Refgen1	5	+	150917312	150917611	300	0	0	0	0	NA	NA	NA	NA	NA
AC219190.3_FG002	Refgen1	9	-	97168335	97170581	798	3	3	0.563	0.573	NA	NA	NA	NA	LOC100283615
AC220924.2_FG004	Refgen1	9	-	35458082	35461755	2025	6	0	0.444	0	NA	NA	NA	NA	NA
AC220927.3_FG001	Refgen1	5	-	208082678	208083229	552	0	0	0	0	NA	NA	NA	NA	NA
AC220927.3_FG004	Refgen1	5	-	207926859	207931928	852	93	101	16.36	18.068	0.17	0.430456	0.571418	no	NA
AC220927.3_FG007	Refgen1	5	+	207869737	207870681	945	146	44	23.156	7.096	-1.66	2.04112e-13	4.61348e-12	yes	Putative uncharacterized protein
AC220927.3_FG008	Refgen1	5	-	207883853	207888658	1200	0	0	0	0	NA	NA	NA	NA	NA
AC220927.3_FG011	Refgen1	5	-	208041319	208046340	1566	62	77	5.934	7.494	0.36	0.149758	0.257622	no	NA
AC220970.4_FG001	Refgen1	5	-	434384	446046	3555	0	0	0	0	NA	NA	NA	NA	NA
AC220970.4_FG002	Refgen1	5	-	534150	536159	1665	115	79	10.352	7.232	-0.49	0.0213414	0.054117	no	hypothetical protein LOC100274864
AC220972.3_FG001	Refgen1	3	+	55133915	55134679	765	3	4	0.588	0.797	NA	NA	NA	NA	RING-H2 finger protein ATL2L
AC220999.3_FG006	Refgen1	6	+	160802477	160809754	2145	29	54	2.026	3.837	0.92	0.00413754	0.0138714	no	NA
AC225127.3_FG003	Refgen1	4	-	200806623	200806982	360	1	0	0.416	0	NA	NA	NA	NA	LTP-like protein
AC225147.4_FG002	Refgen1	1	-	291821868	291822758	471	113	127	35.958	41.096	0.21	0.272391	0.406207	no	hypothetical protein LOC100192600
AC225147.4_FG003	Refgen1	1	-	291817648	291821080	747	45	45	9.029	9.181	0.05	0.916236	0.957631	no	hypothetical protein LOC100192747
AC225147.4_FG004	Refgen1	1	+	291832078	291835577	1233	227	214	27.593	26.453	-0.04	0.811824	0.885636	no	NA
AC225176.2_FG006	Refgen1	10	-	122466326	122467861	1536	0	0	0	0	NA	NA	NA	NA	NA
AC225179.3_FG003	Refgen1	3	-	80252577	80253290	615	0	0	0	0	NA	NA	NA	NA	NA
AC225185.3_FG004	Refgen1	3	+	84565349	84568853	2001	102	126	7.64	9.597	0.35	0.0735276	0.147851	no	Putative uncharacterized protein
AC225191.2_FG009	Refgen1	10	+	126528000	126531661	987	41	41	6.226	6.331	0.05	0.912361	0.955312	no	NA
AC225193.3_FG003	Refgen1	9	+	109545199	109548250	1290	54	31	6.274	3.663	-0.73	0.0222753	0.0560519	no	Putative uncharacterized protein
AC225193.3_FG004	Refgen1	9	+	109550328	109551802	1269	19	33	2.244	3.963	0.81	0.0511681	0.110445	no	NA
AC225308.2_FG003	Refgen1	7	+	153010767	153012737	1296	15	1	1.735	0.118	NA	NA	NA	NA	NA
AC225308.2_FG005	Refgen1	7	-	152936509	152941300	3084	1	0	0.049	0	NA	NA	NA	NA	hypothetical protein LOC100279470
AC225308.2_FG006	Refgen1	7	+	152932448	152934878	978	6	16	0.92	2.493	NA	NA	NA	NA	NA
AC225309.2_FG003	Refgen1	1	+	126998982	127002392	1143	0	0	0	0	NA	NA	NA	NA	NA
AC225346.3_FG001	Refgen1	8	+	127007976	127008446	471	0	0	0	0	NA	NA	NA	NA	NA
AC225555.3_FG005	Refgen1	7	-	96975666	96976790	1125	0	0	0	0	NA	NA	NA	NA	NA
AC225555.3_FG007	Refgen1	7	-	96870934	96871683	750	0	0	0	0	NA	NA	NA	NA	hypothetical protein LOC100193792
AC225563.3_FG003	Refgen1	2	-	64620828	64622916	306	12	18	5.878	8.965	NA	NA	NA	NA	NA
AC225564.3_FG003	Refgen1	7	-	29527377	29527841	465	0	0	0	0	NA	NA	NA	NA	NA
AC225716.2_FG003	Refgen1	9	+	33387400	33388524	1023	0	0	0	0	NA	NA	NA	NA	NA
AC225716.2_FG006	Refgen1	9	+	33300370	33301493	945	0	0	0	0	NA	NA	NA	NA	NA
AC225718.2_FG004	Refgen1	5	+	47890795	47891451	657	3	7	0.684	1.624	NA	NA	NA	NA	NA
AC225718.2_FG006	Refgen1	5	+	47807806	47808204	399	100	46	37.564	17.571	-1.06	2.02287e-05	0.000136155	yes	EF-hand Ca2+-binding protein CCD1
AC225718.2_FG009	Refgen1	5	-	47935758	47936069	312	1	1	0.48	0.489	NA	NA	NA	NA	hypothetical protein LOC100276384
AC225790.2_FG003	Refgen1	7	-	131888165	131888548	384	3	2	1.171	0.794	NA	NA	NA	NA	NA
AC226221.2_FG011	Refgen1	5	+	135582709	135583323	615	0	0	0	0	NA	NA	NA	NA	NA
AC226227.2_FG003	Refgen1	10	+	128611981	128613627	1647	1	0	0.091	0	NA	NA	NA	NA	NA
AC226227.2_FG004	Refgen1	10	-	128614515	128624676	2550	0	0	0	0	NA	NA	NA	NA	NA
AC226227.2_FG005	Refgen1	10	-	128634280	128635908	1629	28	18	2.576	1.684	-0.56	0.186632	0.305411	no	hypothetical protein LOC100191886
AC226227.2_FG006	Refgen1	10	-	128657303	128658868	1566	43	27	4.115	2.628	-0.6	0.0935631	0.178679	no	NA
AC226230.2_FG002	Refgen1	7	-	62495449	62501175	3171	373	559	17.63	26.868	0.63	3.91572e-11	7.06519e-10	no	NA
AC226235.2_FG001	Refgen1	3	+	30665746	30666894	930	295	111	47.542	18.191	-1.35	4.14898e-19	1.45484e-17	yes	Isoflavone reductase homolog IRL (EC 1.3.1.-)
AC226235.2_FG002	Refgen1	3	+	30617086	30619912	1005	64	89	9.545	13.497	0.52	0.0288281	0.0690009	no	hypothetical protein LOC100277939
AC226235.2_FG003	Refgen1	3	+	30591597	30592724	1128	123	101	16.343	13.647	-0.23	0.229438	0.356686	no	hypothetical protein LOC100192465
AC226243.1_FG003	Refgen1	1	+	16240406	16241050	645	0	1	0	0.236	NA	NA	NA	NA	NA
AC226248.1_FG002	Refgen1	8	-	101802245	101804182	1872	42	24	3.363	1.954	-0.74	0.0480498	0.105172	no	protein kinase
AC226368.2_FG002	Refgen1	1	-	63125129	63129968	720	0	0	0	0	NA	NA	NA	NA	NA
AC226368.2_FG006	Refgen1	1	-	63061269	63062909	1641	11	16	1.005	1.486	NA	NA	NA	NA	transferase, transferring glycosyl groups
AC226373.2_FG009	Refgen1	6	+	156549849	156550169	216	0	0	0	0	NA	NA	NA	NA	NA
AC226373.2_FG010	Refgen1	6	-	156562782	156566834	2103	87	116	6.2	8.407	0.46	0.0246127	0.0607455	no	NA
AC226536.2_FG001	Refgen1	2	-	137530100	137530782	270	0	0	0	0	NA	NA	NA	NA	NA
AC226552.2_FG001	Refgen1	4	+	233827259	233827624	366	0	0	0	0	NA	NA	NA	NA	NA
AC226552.2_FG002	Refgen1	4	+	233830549	233830965	417	0	0	0	0	NA	NA	NA	NA	NA
AC226553.2_FG003	Refgen1	9	-	100695526	100696095	570	3	0	0.789	0	NA	NA	NA	NA	NA
AC226566.1_FG002	Refgen1	2	-	97643527	97648872	1245	0	0	0	0	NA	NA	NA	NA	NA
AC226606.2_FG006	Refgen1	3	+	176581253	176581906	654	0	0	0	0	NA	NA	NA	NA	NA
AC226723.2_FG001	Refgen1	6	+	102225242	102229211	1077	0	0	0	0	NA	NA	NA	NA	NA
AC229673.2_FG006	Refgen1	3	+	147474461	147478392	1032	99	127	14.378	18.756	0.4	0.0389749	0.0882966	no	NA
AC229979.1_FG006	Refgen1	9	+	95685710	95689373	618	0	0	0	0	NA	NA	NA	NA	NA
AC229993.1_FG009	Refgen1	3	-	207356541	207357929	609	0	0	0	0	NA	NA	NA	NA	NA
AC230011.2_FG002	Refgen1	3	-	110176267	110182574	4422	698	936	23.658	32.261	0.47	5.91363e-11	1.03719e-09	no	Rust resistance protein rp3-1
AC230013.2_FG002	Refgen1	3	-	209110807	209113636	1119	29	37	3.884	5.04	0.39	0.27073	0.404246	no	NA
AC230013.2_FG003	Refgen1	3	+	209136112	209140295	561	30	41	8.015	11.139	0.49	0.155866	0.265777	no	NA
AC230013.2_FG007	Refgen1	3	+	209154421	209155804	537	274	245	76.475	69.536	-0.11	0.380063	0.52008	no	LOC100283101
AC230017.2_FG008	Refgen1	4	-	207789699	207790946	1167	0	0	0	0	NA	NA	NA	NA	NA
AC230017.2_FG009	Refgen1	4	-	207791644	207792887	1161	0	0	0	0	NA	NA	NA	NA	NA
AC230020.1_FG006	Refgen1	2	+	164983682	164986012	342	0	0	0	0	NA	NA	NA	NA	NA
AC230020.1_FG009	Refgen1	2	+	164992058	164994709	1515	19	20	1.88	2.012	NA	NA	NA	NA	NA
AC230021.2_FG002	Refgen1	2	-	187495892	187496686	795	0	0	0	0	NA	NA	NA	NA	NA
AC230023.2_FG002	Refgen1	1	-	265623911	265624633	723	0	0	0	0	NA	NA	NA	NA	NA
AC230023.2_FG003	Refgen1	1	-	265595814	265596536	723	0	0	0	0	NA	NA	NA	NA	NA
AC230023.2_FG004	Refgen1	1	-	265597451	265598173	723	0	0	0	0	NA	NA	NA	NA	NA
AC230023.2_FG006	Refgen1	1	-	265678581	265678881	301	0	0	0	0	NA	NA	NA	NA	NA
AC231180.2_FG001	Refgen1	8	+	74865393	74874348	3297	56	44	2.546	2.034	-0.29	0.318268	0.456391	no	NA
AC231180.2_FG006	Refgen1	8	+	74957960	74959587	1377	36	11	3.918	1.218	-1.58	0.000374992	0.00178439	no	LOC100283011 (pco140658), mRNA
AC231411.1_FG011	Refgen1	6	+	165718997	165720199	1203	0	0	0	0	NA	NA	NA	NA	triacylglycerol lipase
AC231485.1_FG008	Refgen1	9	-	130605439	130609108	2988	195	191	9.781	9.743	0.02	0.918968	0.958988	no	NA
AC231528.1_FG003	Refgen1	9	+	21433510	21434704	660	0	0	0	0	NA	NA	NA	NA	NA
AC231544.1_FG003	Refgen1	2	-	207159474	207161478	849	0	0	0	0	NA	NA	NA	NA	NA
AC231604.1_FG001	Refgen1	6	-	121384145	121384998	627	0	0	0	0	NA	NA	NA	NA	NA
AC231745.1_FG003	Refgen1	9	+	18207657	18209577	1152	1030	491	134.007	64.96	-1.02	1.45817e-40	1.32551e-38	yes	NA
AC231745.1_FG004	Refgen1	9	+	18129302	18137697	2796	103	101	5.521	5.506	0.02	0.944253	0.975876	no	NA
AC231747.1_FG001	Refgen1	10	-	108295682	108302324	2913	134	161	6.895	8.424	0.31	0.0708834	0.143396	no	hypothetical protein LOC100217064
AC231747.1_FG004	Refgen1	10	-	108240546	108246168	1557	15	13	1.444	1.273	NA	NA	NA	NA	NA
AC232238.2_FG004	Refgen1	8	+	165509455	165513975	1374	5	5	0.545	0.555	NA	NA	NA	NA	Liguleless2-like protein
AC232238.2_FG005	Refgen1	8	-	165503666	165504112	447	0	0	0	0	NA	NA	NA	NA	hypothetical protein LOC100382495
AC232238.2_FG006	Refgen1	8	-	165497057	165499756	1428	425	138	44.607	14.729	-1.57	4.74232e-33	3.21134e-31	yes	NA
AC232238.2_FG007	Refgen1	8	+	165463807	165464632	747	5	0	1.003	0	NA	NA	NA	NA	NA
AC232238.2_FG008	Refgen1	8	-	165430796	165460345	1125	5	4	0.666	0.542	NA	NA	NA	NA	NA
AC232289.2_FG002	Refgen1	3	+	8408113	8408766	654	8	7	1.833	1.631	NA	NA	NA	NA	NA
AC232289.2_FG009	Refgen1	3	+	8429836	8430273	438	0	0	0	0	NA	NA	NA	NA	NA
AC232321.1_FG008	Refgen1	4	+	102318170	102318899	612	0	0	0	0	NA	NA	NA	NA	NA
AC232393.1_FG009	Refgen1	5	-	214948382	214950112	1731	31	25	2.684	2.201	-0.25	0.507613	0.641749	no	NA
AC233751.1_FG001	Refgen1	4	+	44591975	44598777	585	88	87	22.546	22.666	0.03	0.939765	0.973102	no	NA
AC233751.1_FG002	Refgen1	4	-	44599234	44603560	1767	9	11	0.763	0.949	NA	NA	NA	NA	NA
AC233785.2_FG005	Refgen1	1	-	265758759	265759523	765	0	0	0	0	NA	NA	NA	NA	NA
AC233788.2_FG003	Refgen1	8	+	168094853	168095098	246	1	0	0.609	0	NA	NA	NA	NA	NA
AC233788.2_FG005	Refgen1	8	+	168102714	168110662	2391	1	2	0.063	0.127	NA	NA	NA	NA	NA
AC233788.2_FG006	Refgen1	8	-	168196494	168207458	2421	91	76	5.634	4.785	-0.21	0.353876	0.494429	no	NA
AC233788.2_FG007	Refgen1	8	+	168222865	168226544	1494	44	12	4.414	1.224	-1.74	2.37653e-05	0.000157301	yes	NA
AC233788.2_FG008	Refgen1	8	+	168130729	168132046	963	6	2	0.934	0.317	NA	NA	NA	NA	NA
AC233850.1_FG001	Refgen1	5	+	169108718	169109170	453	1	0	0.331	0	NA	NA	NA	NA	NA
AC233850.1_FG002	Refgen1	5	+	169111634	169112173	540	11	8	3.053	2.258	NA	NA	NA	NA	pectinesterase inhibitor domain containing protein
AC233850.1_FG003	Refgen1	5	+	169113905	169114450	546	16	0	4.392	0	NA	NA	NA	NA	NA
AC233850.1_FG004	Refgen1	5	+	169119517	169126532	2217	1	0	0.068	0	NA	NA	NA	NA	NA
AC233850.1_FG005	Refgen1	5	-	169128040	169131970	1440	4	12	0.416	1.27	NA	NA	NA	NA	NA
AC233850.1_FG006	Refgen1	5	+	169133411	169137087	783	4512	4478	863.672	871.649	0.04	0.233121	0.360768	no	NA
AC233850.1_FG009	Refgen1	5	+	169181335	169184314	1944	1	0	0.077	0	NA	NA	NA	NA	hypothetical protein LOC100273545
AC233851.1_FG008	Refgen1	3	+	187708521	187708886	366	11	4	4.505	1.666	NA	NA	NA	NA	NA
AC233851.1_FG009	Refgen1	3	+	187712287	187712598	312	3	0	1.441	0	NA	NA	NA	NA	hypothetical protein LOC100277429
AC233851.1_FG010	Refgen1	3	+	187716388	187716777	390	3	0	1.153	0	NA	NA	NA	NA	hypothetical protein LOC100191569
AC233851.1_FG011	Refgen1	3	+	187717442	187719276	1281	3	0	0.351	0	NA	NA	NA	NA	Putative uncharacterized protein
AC233851.1_FG012	Refgen1	3	-	187721122	187721473	276	7	7	3.801	3.866	NA	NA	NA	NA	NA
AC233851.1_FG013	Refgen1	3	+	187721949	187725490	567	57	50	15.067	13.44	-0.14	0.629936	0.746251	no	NA
AC233851.1_FG014	Refgen1	3	-	187749149	187750330	1182	145	140	18.386	18.052	0	1	1	no	hypothetical protein LOC100273462
AC233851.1_FG017	Refgen1	3	+	187787528	187789449	1794	0	0	0	0	NA	NA	NA	NA	NA
AC233853.1_FG002	Refgen1	3	+	3769559	3770786	867	4	0	0.691	0	NA	NA	NA	NA	Putative uncharacterized protein
AC233853.1_FG003	Refgen1	3	+	3779236	3780786	1551	51	19	4.928	1.867	-1.33	0.00027233	0.00135364	no	NA
AC233854.1_FG001	Refgen1	8	+	75766433	75770699	1659	1	4	0.09	0.367	NA	NA	NA	NA	NA
AC233854.1_FG002	Refgen1	8	-	75773546	75775073	1299	1	1	0.115	0.117	NA	NA	NA	NA	NA
AC233855.1_FG003	Refgen1	9	+	100541623	100552569	1683	0	0	0	0	NA	NA	NA	NA	NA
AC233856.1_FG003	Refgen1	1	+	225394016	225399247	1275	59	99	6.936	11.834	0.78	0.000785291	0.00337222	no	NA
AC233859.1_FG002	Refgen1	1	-	32627583	32630723	1938	186	143	14.385	11.246	-0.33	0.0412155	0.092477	no	NA
AC233859.1_FG003	Refgen1	1	+	32565597	32567196	420	82	89	29.262	32.297	0.16	0.491391	0.627161	no	NA
AC233859.1_FG004	Refgen1	1	+	32568336	32572646	660	55	55	12.49	12.701	0.05	0.924098	0.96278	no	NA
AC233859.1_FG005	Refgen1	1	+	32580192	32583461	1065	136	178	19.14	25.474	0.43	0.0079598	0.0241064	no	NA
AC233861.1_FG001	Refgen1	2	-	186133900	186136761	2862	0	0	0	0	NA	NA	NA	NA	NA
AC233863.1_FG001	Refgen1	9	+	94989436	94989795	360	3	1	1.249	0.423	NA	NA	NA	NA	hypothetical protein LOC100278341
AC233863.1_FG002	Refgen1	9	-	94991540	94991887	348	1	0	0.431	0	NA	NA	NA	NA	hypothetical protein LOC100279119
AC233864.1_FG004	Refgen1	8	+	122598157	122602761	1467	0	0	0	0	NA	NA	NA	NA	NA
AC233864.1_FG006	Refgen1	8	+	122615137	122622992	1284	1	1	0.117	0.119	NA	NA	NA	NA	NA
AC233864.1_FG014	Refgen1	8	-	122713069	122716556	1422	0	0	0	0	NA	NA	NA	NA	Putative uncharacterized protein
AC233865.1_FG001	Refgen1	7	-	141034023	141034334	312	363	113	174.379	55.201	-1.63	6.90207e-30	4.22082e-28	yes	Histone H4
AC233865.1_FG002	Refgen1	7	+	141027777	141031956	1143	5	6	0.656	0.8	NA	NA	NA	NA	NA
AC233865.1_FG003	Refgen1	7	+	141023510	141025201	738	8	0	1.625	0	NA	NA	NA	NA	NA
AC233865.1_FG004	Refgen1	7	+	141013942	141016824	2448	0	0	0	0	NA	NA	NA	NA	NA
AC233865.1_FG006	Refgen1	7	-	140975270	140978720	1176	33	31	4.206	4.018	-0.04	1	1	no	NA
AC233866.1_FG003	Refgen1	6	-	137557811	137559070	1260	0	0	0	0	NA	NA	NA	NA	NA
AC233866.1_FG005	Refgen1	6	-	137582579	137584879	933	7	2	1.124	0.327	NA	NA	NA	NA	NA
AC233866.1_FG006	Refgen1	6	+	137602711	137604538	1344	2455	2630	273.775	298.247	0.15	0.000294817	0.00144905	no	elongation factor 1 alpha
AC233866.1_FG007	Refgen1	6	-	137605935	137608135	768	0	0	0	0	NA	NA	NA	NA	NA
AC233866.1_FG009	Refgen1	6	-	137618878	137619282	405	4	6	1.48	2.258	NA	NA	NA	NA	NA
AC233869.1_FG002	Refgen1	7	+	124214007	124215674	1668	77	80	6.919	7.31	0.1	0.69011	0.79381	no	NA
AC233869.1_FG003	Refgen1	7	+	124221415	124223557	1221	19	29	2.332	3.62	0.63	0.148285	0.255667	no	NA
AC233869.1_FG004	Refgen1	7	-	124225194	124230814	2832	749	674	39.64	36.273	-0.1	0.176296	0.291925	no	NA
AC233870.1_FG001	Refgen1	6	-	167052321	167055356	843	0	0	0	0	NA	NA	NA	NA	NA
AC233870.1_FG003	Refgen1	6	-	167148273	167151048	1944	694	560	53.506	43.905	-0.26	0.0014069	0.00556833	no	NA
AC233870.1_FG004	Refgen1	6	+	167145082	167147833	1944	28	22	2.159	1.725	-0.29	0.482843	0.619185	no	hypothetical protein LOC100216954
AC233870.1_FG005	Refgen1	6	-	167120934	167123385	660	76	91	17.259	21.014	0.3	0.188206	0.3073	no	NA
AC233871.1_FG003	Refgen1	6	+	1796858	1799856	1620	0	0	0	0	NA	NA	NA	NA	calcium-dependent protein kinase, isoform AK1
AC233871.1_FG004	Refgen1	6	+	1808345	1813137	3042	0	0	0	0	NA	NA	NA	NA	hypothetical protein LOC100279470
AC233871.1_FG007	Refgen1	6	+	1849764	1860230	2064	15	19	1.089	1.403	NA	NA	NA	NA	NA
AC233871.1_FG012	Refgen1	6	-	1867667	1868785	1119	5	3	0.67	0.409	NA	NA	NA	NA	NA
AC233872.1_FG001	Refgen1	3	+	17951307	17955341	987	60	43	9.111	6.64	-0.42	0.1399	0.244076	no	NA
AC233872.1_FG003	Refgen1	3	+	17942886	17945004	795	117	173	22.058	33.166	0.61	0.000407738	0.00191729	no	mitochondrial glycoprotein
AC233875.1_FG001	Refgen1	9	-	52859138	52875426	861	0	0	0	0	NA	NA	NA	NA	NA
AC233878.1_FG004	Refgen1	1	-	271693620	271712479	2655	40	61	2.258	3.502	0.64	0.0281669	0.0677631	no	NA
AC233879.1_FG002	Refgen1	6	-	140617971	140618385	276	0	1	0	0.552	NA	NA	NA	NA	Late embryogenesis abundant protein EMB564
AC233880.1_FG005	Refgen1	3	+	1231476	1231856	381	0	3	0	1.2	NA	NA	NA	NA	DNA binding protein
AC233880.1_FG006	Refgen1	3	+	1232407	1233918	855	23	29	4.032	5.17	0.37	0.405649	0.546464	no	hypothetical protein LOC100272390
AC233880.1_FG007	Refgen1	3	+	1237346	1237813	420	20	12	7.137	4.355	NA	NA	NA	NA	NA
AC233880.1_FG008	Refgen1	3	+	1239854	1240591	331	37	79	16.754	36.376	1.12	5.39971e-05	0.000327467	yes	NA
AC233880.1_FG009	Refgen1	3	+	1290994	1293250	783	0	0	0	0	NA	NA	NA	NA	NA
AC233880.1_FG010	Refgen1	3	+	1296082	1303557	2220	18	17	1.215	1.167	NA	NA	NA	NA	NA
AC233881.1_FG006	Refgen1	5	+	199398070	199398832	705	0	0	0	0	NA	NA	NA	NA	NA
AC233882.1_FG002	Refgen1	3	+	204036153	204041781	3039	12	24	0.592	1.204	NA	NA	NA	NA	NA
AC233882.1_FG003	Refgen1	3	-	204112238	204121821	3921	17	35	0.65	1.36	1.05	0.0118147	0.0332828	no	NA
AC233882.1_FG004	Refgen1	3	-	204091279	204092858	699	34	41	7.29	8.94	0.31	0.357472	0.49809	no	NA
AC233882.1_FG005	Refgen1	3	+	204086183	204090720	2025	48	62	3.553	4.666	0.41	0.152349	0.261005	no	NA
AC233883.1_FG001	Refgen1	4	+	198870411	198871001	471	0	0	0	0	NA	NA	NA	NA	NA
AC233883.1_FG003	Refgen1	4	+	198853473	198857241	2079	69	87	4.974	6.378	0.38	0.10919	0.201735	no	NA
AC233883.1_FG006	Refgen1	4	+	198901208	198902254	1047	1	6	0.143	0.873	NA	NA	NA	NA	hypothetical protein LOC100278888
AC233884.1_FG001	Refgen1	3	-	51297591	51298928	564	0	0	0	0	NA	NA	NA	NA	NA
AC233885.1_FG001	Refgen1	5	-	15843589	15847458	1557	54	48	5.198	4.699	-0.12	0.692897	0.795541	no	hypothetical protein LOC100277588
AC233885.1_FG002	Refgen1	5	+	16010367	16011003	471	2	1	0.636	0.324	NA	NA	NA	NA	hypothetical protein LOC100382821
AC233885.1_FG004	Refgen1	5	+	15980592	15987387	2769	11	10	0.595	0.55	NA	NA	NA	NA	NA
AC233887.1_FG005	Refgen1	2	+	55385661	55387910	1395	0	0	0	0	NA	NA	NA	NA	aluminum-induced transporter
AC233887.1_FG006	Refgen1	2	-	55390376	55394767	2349	8	20	0.51	1.298	NA	NA	NA	NA	NA
AC233888.1_FG001	Refgen1	10	+	127589622	127592014	1284	4	7	0.467	0.831	NA	NA	NA	NA	Putative uncharacterized protein
AC233888.1_FG002	Refgen1	10	+	127573983	127575085	972	153	111	23.592	17.405	-0.41	0.0226004	0.0567248	no	NA
AC233889.1_FG001	Refgen1	4	-	13194469	13195344	597	0	0	0	0	NA	NA	NA	NA	NA
AC233892.1_FG001	Refgen1	1	-	231205820	231207568	1749	49	70	4.199	6.1	0.55	0.0432415	0.0962546	no	hypothetical protein LOC100381779
AC233893.1_FG001	Refgen1	9	+	141785786	141787201	819	276	269	50.509	50.06	0.01	0.965833	0.993207	no	Homocysteine S-methyltransferase 1 (EC 2.1.1.10)(S-methylmethionine:homocysteine methyltransferase 1)(SMM:Hcy S-methyltransferase 1)(ZmHMT-1)
AC233893.1_FG002	Refgen1	9	-	141787642	141789183	633	15	8	3.552	1.926	NA	NA	NA	NA	NA
AC233893.1_FG003	Refgen1	9	-	141801449	141802933	1485	249	114	25.131	11.7	-1.07	7.92296e-12	1.53913e-10	yes	NA
AC233893.1_FG004	Refgen1	9	-	141817144	141818888	1407	16	7	1.704	0.758	NA	NA	NA	NA	NA
AC233893.1_FG005	Refgen1	9	+	141828489	141834887	1614	10	23	0.929	2.172	NA	NA	NA	NA	NA
AC233893.1_FG006	Refgen1	9	+	141768918	141770577	1518	210	111	20.734	11.145	-0.87	1.71841e-07	1.81453e-06	yes	NA
AC233894.1_FG002	Refgen1	5	+	28167472	28167886	375	1	1	0.4	0.406	NA	NA	NA	NA	NA
AC233894.1_FG005	Refgen1	5	+	28193903	28195243	1341	32	54	3.577	6.137	0.78	0.012857	0.0356863	no	hypothetical protein LOC100277795
AC233895.1_FG001	Refgen1	6	-	140541217	140543799	1185	316	424	39.968	54.534	0.47	9.93969e-06	7.2346e-05	no	proliferation-associated protein 2G4
AC233898.1_FG003	Refgen1	10	-	9998504	9998866	363	1	0	0.413	0	NA	NA	NA	NA	hypothetical protein LOC100277541
AC233898.1_FG004	Refgen1	10	+	9945652	9949477	1572	33	38	3.146	3.684	0.25	0.478712	0.61535	no	hypothetical protein LOC100193539
AC233899.1_FG002	Refgen1	9	-	145279187	145280695	1074	1	0	0.14	0	NA	NA	NA	NA	hypothetical protein LOC100273916
AC233899.1_FG004	Refgen1	9	+	145262103	145263617	1134	1	0	0.132	0	NA	NA	NA	NA	homeodomain-leucine zipper transcription factor TaHDZipI-1
AC233899.1_FG005	Refgen1	9	+	145267931	145268488	558	4	5	1.074	1.366	NA	NA	NA	NA	hypothetical protein LOC100382983
AC233900.1_FG002	Refgen1	3	+	95228960	95235780	1371	0	0	0	0	NA	NA	NA	NA	NA
AC233901.1_FG001	Refgen1	9	-	148422279	148430553	1671	89	106	7.983	9.668	0.3	0.152508	0.261196	no	NA
AC233901.1_FG002	Refgen1	9	+	148433854	148435536	1227	3	1	0.366	0.124	NA	NA	NA	NA	NA
AC233901.1_FG003	Refgen1	9	+	148437390	148438594	969	1	0	0.155	0	NA	NA	NA	NA	NA
AC233901.1_FG005	Refgen1	9	+	148480341	148482259	1131	21	28	2.783	3.773	0.45	0.317435	0.455549	no	NA
AC233901.1_FG008	Refgen1	9	+	148469790	148470775	765	0	0	0	0	NA	NA	NA	NA	NA
AC233901.1_FG010	Refgen1	9	-	148383817	148386109	717	200	227	41.807	48.253	0.23	0.110108	0.203005	no	NA
AC233903.1_FG001	Refgen1	2	+	35401728	35402642	771	0	0	0	0	NA	NA	NA	NA	NA
AC233903.1_FG002	Refgen1	2	-	35411556	35412116	561	0	0	0	0	NA	NA	NA	NA	hypothetical protein LOC100276993 (LOC100276993), mRNA
AC233904.1_FG002	Refgen1	3	-	141396377	141402542	1230	1	1	0.122	0.124	NA	NA	NA	NA	NA
AC233909.1_FG001	Refgen1	8	+	158292834	158293349	516	0	0	0	0	NA	NA	NA	NA	NA
AC233910.1_FG001	Refgen1	2	-	194913817	194918323	1212	32	32	3.957	4.024	0.05	0.901305	0.94895	no	NA
AC233910.1_FG003	Refgen1	2	-	194924637	194925328	432	1	0	0.347	0	NA	NA	NA	NA	UBiQuitin family member
AC233910.1_FG006	Refgen1	2	-	194863981	194866342	654	45	28	10.313	6.525	-0.62	0.0784751	0.155869	no	NA
AC233910.1_FG007	Refgen1	2	+	194867473	194871981	1536	391	510	38.153	50.606	0.43	9.03497e-06	6.67782e-05	no	NA
AC233910.1_FG008	Refgen1	2	-	194872774	194873499	726	14	18	2.89	3.779	NA	NA	NA	NA	PRLI-interacting factor A
AC233910.1_FG010	Refgen1	2	-	194835350	194838089	1275	49	75	5.76	8.965	0.65	0.0119376	0.0335463	no	hypothetical protein LOC100274474
AC233912.1_FG001	Refgen1	7	-	19980787	19991887	1866	2	10	0.161	0.817	NA	NA	NA	NA	NA
AC233914.1_FG001	Refgen1	10	-	149097664	149098044	381	214	118	84.184	47.204	-0.81	6.72473e-07	6.33321e-06	yes	hypothetical protein LOC100277249
AC233914.1_FG002	Refgen1	10	+	149138600	149140492	870	49	45	8.441	7.883	-0.07	0.836949	0.904374	no	NA
AC233916.1_FG002	Refgen1	8	-	162616965	162617531	567	1	0	0.264	0	NA	NA	NA	NA	NA
AC233920.1_FG002	Refgen1	5	-	151312687	151323742	1632	111	102	10.194	9.526	-0.07	0.732111	0.827552	no	NA
AC233922.1_FG005	Refgen1	4	-	243671426	243674249	1110	253	182	34.162	24.99	-0.43	0.00247988	0.00902097	no	Putative uncharacterized protein
AC233922.1_FG008	Refgen1	4	+	243657546	243661106	942	77	82	12.251	13.267	0.14	0.579059	0.703374	no	Ubiquitin carrier protein (EC 6.3.2.-)
AC233926.1_FG002	Refgen1	7	+	33160569	33160880	312	0	0	0	0	NA	NA	NA	NA	PVR3-like protein
AC233926.1_FG003	Refgen1	7	-	33115641	33122643	2082	68	239	4.895	17.496	1.85	7.90475e-25	3.86593e-23	yes	NA
AC233928.1_FG001	Refgen1	5	+	125610179	125610688	510	0	0	0	0	NA	NA	NA	NA	NA
AC233928.1_FG004	Refgen1	5	-	125589528	125592185	2658	13	14	0.733	0.803	NA	NA	NA	NA	NA
AC233933.1_FG001	Refgen1	7	+	36673217	36674005	789	0	0	0	0	NA	NA	NA	NA	NA
AC233935.1_FG005	Refgen1	1	-	41092264	41093664	1164	440	504	56.655	65.993	0.24	0.0100955	0.0292749	no	Putative uncharacterized protein
AC233938.1_FG003	Refgen1	5	+	178702897	178703226	330	4	1	1.817	0.462	NA	NA	NA	NA	hypothetical protein LOC100275655
AC233939.1_FG002	Refgen1	9	+	134578520	134585688	4242	277	350	9.787	12.575	0.38	0.000906359	0.00378994	no	NA
AC233939.1_FG003	Refgen1	9	-	134587423	134589099	921	71	69	11.554	11.418	0.01	1	1	no	nitric oxide synthase interacting protein
AC233939.1_FG004	Refgen1	9	-	134547338	134547767	246	0	0	0	0	NA	NA	NA	NA	plant-specific domain TIGR01589 family protein
AC233942.1_FG001	Refgen1	6	+	137473672	137476613	711	92	89	19.394	19.078	0	1	1	no	hypothetical protein LOC100382855
AC233942.1_FG004	Refgen1	6	-	137449422	137451949	1164	48	40	6.181	5.238	-0.21	0.523102	0.654651	no	NA
AC233943.1_FG002	Refgen1	3	+	12640743	12641528	786	0	0	0	0	NA	NA	NA	NA	ramosa 2
AC233944.1_FG002	Refgen1	5	+	149990561	149991418	858	0	0	0	0	NA	NA	NA	NA	NA
AC233945.1_FG001	Refgen1	3	+	206276872	206279734	636	19	35	4.478	8.387	0.9	0.0285073	0.0683898	no	NA
AC233945.1_FG004	Refgen1	3	+	206333852	206335620	1188	10	12	1.262	1.54	NA	NA	NA	NA	NA
AC233946.1_FG004	Refgen1	3	+	204956691	204957461	639	0	0	0	0	NA	NA	NA	NA	NA
AC233948.1_FG007	Refgen1	10	-	149317639	149319600	1962	158	107	12.07	8.312	-0.51	0.00462712	0.0152289	no	NA
AC233948.1_FG008	Refgen1	10	-	149320157	149324748	1686	66	79	5.867	7.141	0.3	0.213272	0.337865	no	NA
AC233949.1_FG004	Refgen1	5	-	31403813	31408879	2538	1716	2307	101.337	138.54	0.47	3.46523e-25	1.73013e-23	no	hypothetical protein LOC100382799
AC233950.1_FG002	Refgen1	1	-	264847670	264848770	1101	0	0	0	0	NA	NA	NA	NA	Transcription factor TEOSINTE BRANCHED 1
AC233952.1_FG005	Refgen1	2	+	206552513	206554825	1107	62	87	8.394	11.978	0.53	0.0267822	0.0650063	no	NA
AC233952.1_FG008	Refgen1	2	+	206534738	206535886	1149	21	16	2.739	2.122	NA	NA	NA	NA	hypothetical protein LOC100280366
AC233953.1_FG004	Refgen1	8	+	158207786	158209550	1176	6	2	0.765	0.259	NA	NA	NA	NA	NA
AC233953.1_FG005	Refgen1	8	-	158212253	158216737	2199	321	472	21.879	32.714	0.6	6.27558e-09	8.37712e-08	no	NA
AC233954.1_FG004	Refgen1	7	+	13401083	13402821	603	0	1	0	0.253	NA	NA	NA	NA	NA
AC233955.1_FG002	Refgen1	9	-	130914513	130915226	714	0	0	0	0	NA	NA	NA	NA	hypothetical protein LOC100277228
AC233955.1_FG003	Refgen1	9	-	130911659	130912642	984	0	0	0	0	NA	NA	NA	NA	NA
AC233955.1_FG004	Refgen1	9	-	130907555	130908055	501	0	0	0	0	NA	NA	NA	NA	NA
AC233955.1_FG008	Refgen1	9	-	130895038	130897689	1146	9	8	1.177	1.064	NA	NA	NA	NA	NA
AC233955.1_FG009	Refgen1	9	-	130890242	130892935	2022	13	13	0.964	0.98	NA	NA	NA	NA	NA
AC233955.1_FG010	Refgen1	9	+	130886000	130889649	1881	82	66	6.534	5.348	-0.26	0.285457	0.420365	no	NA
AC233955.1_FG011	Refgen1	9	+	130875356	130880235	3105	40	38	1.931	1.865	-0.02	1	1	no	NA
AC233958.1_FG002	Refgen1	8	+	127362701	127365301	756	93	100	18.438	20.16	0.15	0.472446	0.610156	no	NA
AC233959.1_FG002	Refgen1	5	+	79660878	79662445	681	289	320	63.605	71.618	0.19	0.10491	0.195469	no	NA
AC233959.1_FG003	Refgen1	5	-	79684919	79685221	303	0	0	0	0	NA	NA	NA	NA	NA
AC233959.1_FG006	Refgen1	5	-	79782277	79783260	984	0	0	0	0	NA	NA	NA	NA	NA
AC233960.1_FG002	Refgen1	5	-	199136262	199136945	609	14	22	3.445	5.506	NA	NA	NA	NA	alternative oxidase AOX1 precursor
AC233960.1_FG003	Refgen1	5	+	199131210	199133682	840	16	14	2.855	2.54	NA	NA	NA	NA	Putative uncharacterized protein
AC233960.1_FG004	Refgen1	5	+	199125120	199127016	894	9	7	1.509	1.193	NA	NA	NA	NA	NA
AC233960.1_FG005	Refgen1	5	-	199119726	199121731	1476	0	0	0	0	NA	NA	NA	NA	NA
AC233961.1_FG001	Refgen1	7	+	20236784	20239354	2571	214	241	12.475	14.287	0.22	0.110908	0.204106	no	hypothetical protein LOC100280164
AC233966.1_FG007	Refgen1	2	+	150193905	150197776	1716	215	296	18.779	26.29	0.51	7.97088e-05	0.000460681	no	NA
AC233967.1_FG001	Refgen1	2	+	54565704	54567269	297	74	49	37.344	25.145	-0.54	0.0468191	0.102823	no	SWIb domain-containing protein
AC233967.1_FG002	Refgen1	2	+	54569473	54571459	708	0	0	0	0	NA	NA	NA	NA	NA
AC233967.1_FG003	Refgen1	2	+	54573058	54579451	1791	0	0	0	0	NA	NA	NA	NA	NA
AC233979.1_FG006	Refgen1	10	-	134693215	134694832	579	14	11	3.624	2.896	NA	NA	NA	NA	hypothetical protein LOC100273313
AC233979.1_FG007	Refgen1	10	-	134767362	134767652	291	40	16	20.602	8.38	-1.22	0.00198549	0.0074779	no	hypothetical protein LOC100304004
AC233979.1_FG008	Refgen1	10	-	134771975	134772289	315	20	4	9.516	1.935	NA	NA	NA	NA	hypothetical protein LOC100277093 (LOC100277093), mRNA
AC233979.1_FG009	Refgen1	10	+	134800893	134806017	1464	96	162	9.828	16.865	0.8	1.19652e-05	8.53065e-05	no	hypothetical protein LOC100384646
AC233979.1_FG010	Refgen1	10	+	134807799	134809396	279	4	17	2.149	9.287	NA	NA	NA	NA	hypothetical protein LOC100275350
AC233979.1_FG011	Refgen1	10	+	134811499	134812617	1119	3	0	0.402	0	NA	NA	NA	NA	hypothetical protein LOC100217173
AC234091.1_FG001	Refgen1	2	-	115875713	115879108	2328	102	47	6.567	3.077	-1.05	1.6967e-05	0.000116355	yes	NA
AC234108.1_FG001	Refgen1	9	+	98452892	98454859	1143	0	0	0	0	NA	NA	NA	NA	NA
AC234108.1_FG003	Refgen1	9	+	98458300	98463232	2724	339	346	18.652	19.359	0.08	0.491754	0.627198	no	NA
AC234148.1_FG001	Refgen1	5	-	124443184	124444410	1227	0	0	0	0	NA	NA	NA	NA	hypothetical protein LOC100382322
AC234149.1_FG002	Refgen1	8	+	121986193	121987044	852	0	0	0	0	NA	NA	NA	NA	NA
AC234150.1_FG001	Refgen1	6	+	32619066	32620579	477	0	0	0	0	NA	NA	NA	NA	NA
AC234150.1_FG007	Refgen1	6	-	32658150	32658618	369	201	174	81.642	71.869	-0.16	0.301636	0.438824	no	NA
AC234152.1_FG001	Refgen1	8	-	100911179	100913413	813	29	29	5.346	5.437	0.05	1	1	no	NA
AC234152.1_FG002	Refgen1	8	-	100932059	100936723	2310	113	52	7.332	3.431	-1.06	5.19048e-06	4.04171e-05	yes	Putative uncharacterized protein
AC234152.1_FG005	Refgen1	8	+	100954372	100960640	2013	1	0	0.074	0	NA	NA	NA	NA	NA
AC234154.1_FG002	Refgen1	7	+	133046237	133048458	909	364	454	60.018	76.122	0.37	0.000311674	0.00152118	no	NA
AC234154.1_FG007	Refgen1	7	-	133184811	133189650	1374	61	89	6.654	9.872	0.58	0.0141218	0.0386266	no	NA
AC234154.1_FG008	Refgen1	7	+	133161774	133165602	1332	50	33	5.626	3.776	-0.54	0.0993069	0.187177	no	NA
AC234154.1_FG011	Refgen1	7	-	133149916	133152714	402	2	0	0.746	0	NA	NA	NA	NA	NA
AC234154.1_FG012	Refgen1	7	+	133146767	133147174	318	119	125	56.087	59.91	0.12	0.522906	0.654635	no	NA
AC234155.1_FG002	Refgen1	8	+	118186711	118189653	1176	34	56	4.333	7.258	0.75	0.0150197	0.0404867	no	NA
AC234155.1_FG003	Refgen1	8	-	118191304	118191687	384	0	0	0	0	NA	NA	NA	NA	NA
AC234156.1_FG001	Refgen1	4	-	204226497	204228784	735	0	0	0	0	NA	NA	NA	NA	NA
AC234156.1_FG002	Refgen1	4	-	204230459	204234877	960	1	0	0.156	0	NA	NA	NA	NA	NA
[truncated: 30,559 more rows]
